# Supplementary material for: Natural products as Potential Inhibitors of APH(3')-IIIa of <em>Enterococcus faecalis</em>: An <em>In-silico</em> Perspective
Source: Preprints.org preprint supplement (doi:10.20944/preprints202211.0132.v1), 2022-11-08
Supplement: Supplementary file 3 [file supplementary]

## Sheet: Suppl._Table_1
Supplementary table 1. Molecular docking-basead virtual screening of 3,092 natural products on the nucleotide-binding pocket of 2BKK
Natural products	Vina score with 2BKK
ZINC000032123832	-11.1
ZINC000014793040	-10.7
ZINC000000952700	-10.6
ZINC000013629969	-10.6
ZINC000033267221	-10.5
ZINC000072325588	-10.4
ZINC000253395576	-10.4
ZINC000000895394	-10.3
ZINC000001193126	-10.3
ZINC000002995638	-10.3
ZINC000008764734	-10.3
ZINC000253395575	-10.3
ZINC000002219639	-10.2
ZINC000015498603	-10.2
ZINC000016985268	-10.2
ZINC000000629674	-10.1
ZINC000007646291	-10.1
ZINC000008765056	-10.1
ZINC000062001304	-10.1
ZINC000075155689	-10.1
ZINC000000526619	-10
ZINC000000649629	-10
ZINC000004041573	-10
ZINC000004081983	-10
ZINC000004314925	-10
ZINC000012896067	-10
ZINC000024973004	-10
ZINC000031205183	-10
ZINC000032124125	-10
ZINC000000062430	-9.9
ZINC000000129483	-9.9
ZINC000000645844	-9.9
ZINC000000669599	-9.9
ZINC000001000138	-9.9
ZINC000002295637	-9.9
ZINC000004327979	-9.9
ZINC000005186281	-9.9
ZINC000005186286	-9.9
ZINC000006285205	-9.9
ZINC000012296832	-9.9
ZINC000017295740	-9.9
ZINC000019626257	-9.9
ZINC000020573540	-9.9
ZINC000049543307	-9.9
ZINC000054219980	-9.9
ZINC000065248705	-9.9
ZINC000217666784	-9.9
ZINC000000036029	-9.8
ZINC000000299218	-9.8
ZINC000001774452	-9.8
ZINC000005186283	-9.8
ZINC000005252578	-9.8
ZINC000008856458	-9.8
ZINC000009355767	-9.8
ZINC000012900631	-9.8
ZINC000015634187	-9.8
ZINC000022638023	-9.8
ZINC000031034672	-9.8
ZINC000032124479	-9.8
ZINC000036370010	-9.8
ZINC000096116164	-9.8
ZINC000100787891	-9.8
ZINC000000076861	-9.7
ZINC000000252937	-9.7
ZINC000000361920	-9.7
ZINC000000645768	-9.7
ZINC000000705352	-9.7
ZINC000000726166	-9.7
ZINC000000881320	-9.7
ZINC000000945277	-9.7
ZINC000001056954	-9.7
ZINC000001081655	-9.7
ZINC000001181775	-9.7
ZINC000003598909	-9.7
ZINC000004018828	-9.7
ZINC000005350310	-9.7
ZINC000008765013	-9.7
ZINC000008765244	-9.7
ZINC000008879755	-9.7
ZINC000011689966	-9.7
ZINC000013593433	-9.7
ZINC000013653561	-9.7
ZINC000015616332	-9.7
ZINC000020761909	-9.7
ZINC000022766651	-9.7
ZINC000065248687	-9.7
ZINC000065248889	-9.7
ZINC000079189191	-9.7
ZINC000095479167	-9.7
ZINC000000465698	-9.6
ZINC000000485974	-9.6
ZINC000000497416	-9.6
ZINC000000547223	-9.6
ZINC000000716751	-9.6
ZINC000000938341	-9.6
ZINC000000947828	-9.6
ZINC000001183363	-9.6
ZINC000001431982	-9.6
ZINC000003070964	-9.6
ZINC000004325593	-9.6
ZINC000004743727	-9.6
ZINC000004941192	-9.6
ZINC000005265775	-9.6
ZINC000005556278	-9.6
ZINC000005630934	-9.6
ZINC000006188551	-9.6
ZINC000006945956	-9.6
ZINC000007309056	-9.6
ZINC000008764432	-9.6
ZINC000008764453	-9.6
ZINC000008765057	-9.6
ZINC000012296791	-9.6
ZINC000012901074	-9.6
ZINC000017295613	-9.6
ZINC000018074516	-9.6
ZINC000018074517	-9.6
ZINC000019626261	-9.6
ZINC000055027966	-9.6
ZINC000063829210	-9.6
ZINC000065248704	-9.6
ZINC000065248828	-9.6
ZINC000065248834	-9.6
ZINC000075155690	-9.6
ZINC000096222341	-9.6
ZINC000000348815	-9.5
ZINC000000612125	-9.5
ZINC000000970802	-9.5
ZINC000001782109	-9.5
ZINC000002313470	-9.5
ZINC000004089132	-9.5
ZINC000004520331	-9.5
ZINC000005034278	-9.5
ZINC000005163218	-9.5
ZINC000005163649	-9.5
ZINC000005252569	-9.5
ZINC000005252582	-9.5
ZINC000006659844	-9.5
ZINC000006659873	-9.5
ZINC000008764381	-9.5
ZINC000008765014	-9.5
ZINC000008765505	-9.5
ZINC000009135062	-9.5
ZINC000009184292	-9.5
ZINC000009419002	-9.5
ZINC000010691961	-9.5
ZINC000012296790	-9.5
ZINC000012458366	-9.5
ZINC000017845496	-9.5
ZINC000018203176	-9.5
ZINC000023573165	-9.5
ZINC000032124460	-9.5
ZINC000040312939	-9.5
ZINC000055441332	-9.5
ZINC000062001419	-9.5
ZINC000065248813	-9.5
ZINC000072324946	-9.5
ZINC000072324968	-9.5
ZINC000072325780	-9.5
ZINC000072326175	-9.5
ZINC000085879798	-9.5
ZINC000096222528	-9.5
ZINC000000037387	-9.4
ZINC000000064870	-9.4
ZINC000000082459	-9.4
ZINC000000139406	-9.4
ZINC000000204257	-9.4
ZINC000000252950	-9.4
ZINC000000263543	-9.4
ZINC000000490459	-9.4
ZINC000000646122	-9.4
ZINC000000715403	-9.4
ZINC000000727753	-9.4
ZINC000000940064	-9.4
ZINC000000940123	-9.4
ZINC000000985309	-9.4
ZINC000001428710	-9.4
ZINC000001812713	-9.4
ZINC000002432176	-9.4
ZINC000004056187	-9.4
ZINC000004171961	-9.4
ZINC000004538911	-9.4
ZINC000004743662	-9.4
ZINC000004941191	-9.4
ZINC000005960258	-9.4
ZINC000006659874	-9.4
ZINC000006875695	-9.4
ZINC000009095535	-9.4
ZINC000009418760	-9.4
ZINC000009420622	-9.4
ZINC000010220491	-9.4
ZINC000010220492	-9.4
ZINC000011867273	-9.4
ZINC000012902395	-9.4
ZINC000013593437	-9.4
ZINC000013655690	-9.4
ZINC000015513464	-9.4
ZINC000015514750	-9.4
ZINC000017370419	-9.4
ZINC000018074512	-9.4
ZINC000021897756	-9.4
ZINC000022636588	-9.4
ZINC000022766654	-9.4
ZINC000023573167	-9.4
ZINC000031205304	-9.4
ZINC000034786191	-9.4
ZINC000036370093	-9.4
ZINC000040309014	-9.4
ZINC000040309725	-9.4
ZINC000054219982	-9.4
ZINC000056451756	-9.4
ZINC000056452763	-9.4
ZINC000062001380	-9.4
ZINC000065248714	-9.4
ZINC000070666334	-9.4
ZINC000070666358	-9.4
ZINC000070666562	-9.4
ZINC000070666646	-9.4
ZINC000072324908	-9.4
ZINC000072324929	-9.4
ZINC000072325968	-9.4
ZINC000079190538	-9.4
ZINC000079191935	-9.4
ZINC000096114513	-9.4
ZINC000096116521	-9.4
ZINC000100447609	-9.4
ZINC000217836748	-9.4
ZINC000000041471	-9.3
ZINC000000048259	-9.3
ZINC000000086306	-9.3
ZINC000000129487	-9.3
ZINC000000252965	-9.3
ZINC000000277750	-9.3
ZINC000000420319	-9.3
ZINC000000488963	-9.3
ZINC000000547821	-9.3
ZINC000000715423	-9.3
ZINC000000846556	-9.3
ZINC000000851775	-9.3
ZINC000000864974	-9.3
ZINC000000980824	-9.3
ZINC000001056074	-9.3
ZINC000001103131	-9.3
ZINC000002663838	-9.3
ZINC000002816522	-9.3
ZINC000003033906	-9.3
ZINC000004023882	-9.3
ZINC000004435433	-9.3
ZINC000004487680	-9.3
ZINC000004815800	-9.3
ZINC000005140634	-9.3
ZINC000005221403	-9.3
ZINC000005266402	-9.3
ZINC000005304982	-9.3
ZINC000006945929	-9.3
ZINC000008671542	-9.3
ZINC000008764386	-9.3
ZINC000008765456	-9.3
ZINC000008843813	-9.3
ZINC000010691968	-9.3
ZINC000010692210	-9.3
ZINC000011865977	-9.3
ZINC000011866009	-9.3
ZINC000012364222	-9.3
ZINC000012897137	-9.3
ZINC000013625485	-9.3
ZINC000017295598	-9.3
ZINC000020745248	-9.3
ZINC000020762095	-9.3
ZINC000025094069	-9.3
ZINC000027403539	-9.3
ZINC000031034621	-9.3
ZINC000033171326	-9.3
ZINC000035376326	-9.3
ZINC000036369810	-9.3
ZINC000036370094	-9.3
ZINC000040309212	-9.3
ZINC000040309443	-9.3
ZINC000040309767	-9.3
ZINC000049679127	-9.3
ZINC000056452021	-9.3
ZINC000062001300	-9.3
ZINC000062001634	-9.3
ZINC000065248826	-9.3
ZINC000072324644	-9.3
ZINC000072324966	-9.3
ZINC000096116500	-9.3
ZINC000170625415	-9.3
ZINC000000077337	-9.2
ZINC000000139047	-9.2
ZINC000000176670	-9.2
ZINC000000181783	-9.2
ZINC000000252947	-9.2
ZINC000000351988	-9.2
ZINC000000488868	-9.2
ZINC000000519805	-9.2
ZINC000000797604	-9.2
ZINC000000811627	-9.2
ZINC000000851756	-9.2
ZINC000000851781	-9.2
ZINC000000881318	-9.2
ZINC000000946440	-9.2
ZINC000000952697	-9.2
ZINC000000970801	-9.2
ZINC000001033116	-9.2
ZINC000001061009	-9.2
ZINC000001812712	-9.2
ZINC000002137292	-9.2
ZINC000002213629	-9.2
ZINC000002927662	-9.2
ZINC000003567049	-9.2
ZINC000003833919	-9.2
ZINC000004074101	-9.2
ZINC000004487679	-9.2
ZINC000005141342	-9.2
ZINC000005442713	-9.2
ZINC000006624119	-9.2
ZINC000006719077	-9.2
ZINC000006759854	-9.2
ZINC000007767413	-9.2
ZINC000008764227	-9.2
ZINC000008764377	-9.2
ZINC000008764735	-9.2
ZINC000008764808	-9.2
ZINC000008764953	-9.2
ZINC000008878835	-9.2
ZINC000008879751	-9.2
ZINC000009486197	-9.2
ZINC000010692217	-9.2
ZINC000010896238	-9.2
ZINC000011865133	-9.2
ZINC000012895456	-9.2
ZINC000012899768	-9.2
ZINC000012901520	-9.2
ZINC000012902904	-9.2
ZINC000013548665	-9.2
ZINC000013572042	-9.2
ZINC000016740609	-9.2
ZINC000016985258	-9.2
ZINC000020533805	-9.2
ZINC000031840679	-9.2
ZINC000032124207	-9.2
ZINC000032124340	-9.2
ZINC000036099418	-9.2
ZINC000036370107	-9.2
ZINC000040309335	-9.2
ZINC000062001309	-9.2
ZINC000062001396	-9.2
ZINC000065248738	-9.2
ZINC000070666286	-9.2
ZINC000070666621	-9.2
ZINC000072324730	-9.2
ZINC000072324739	-9.2
ZINC000072325084	-9.2
ZINC000116692853	-9.2
ZINC000000037947	-9.1
ZINC000000049564	-9.1
ZINC000000053390	-9.1
ZINC000000085850	-9.1
ZINC000000100039	-9.1
ZINC000000121860	-9.1
ZINC000000129480	-9.1
ZINC000000195406	-9.1
ZINC000000429239	-9.1
ZINC000000488867	-9.1
ZINC000000535116	-9.1
ZINC000000616244	-9.1
ZINC000000622396	-9.1
ZINC000000626450	-9.1
ZINC000000626906	-9.1
ZINC000000727754	-9.1
ZINC000000729798	-9.1
ZINC000000947829	-9.1
ZINC000000995046	-9.1
ZINC000001056531	-9.1
ZINC000001056920	-9.1
ZINC000001076065	-9.1
ZINC000001177649	-9.1
ZINC000002241474	-9.1
ZINC000002273547	-9.1
ZINC000002479361	-9.1
ZINC000002927579	-9.1
ZINC000002932920	-9.1
ZINC000003048761	-9.1
ZINC000003532863	-9.1
ZINC000003567051	-9.1
ZINC000004038781	-9.1
ZINC000004046033	-9.1
ZINC000004112271	-9.1
ZINC000004314036	-9.1
ZINC000004487678	-9.1
ZINC000004487684	-9.1
ZINC000004520329	-9.1
ZINC000004563192	-9.1
ZINC000004593481	-9.1
ZINC000004722167	-9.1
ZINC000004834423	-9.1
ZINC000004857359	-9.1
ZINC000005123741	-9.1
ZINC000005177425	-9.1
ZINC000005221405	-9.1
ZINC000005221630	-9.1
ZINC000005222143	-9.1
ZINC000006228377	-9.1
ZINC000006702896	-9.1
ZINC000006724557	-9.1
ZINC000006727259	-9.1
ZINC000006732687	-9.1
ZINC000006756098	-9.1
ZINC000006947000	-9.1
ZINC000007608804	-9.1
ZINC000008115511	-9.1
ZINC000008764462	-9.1
ZINC000008765053	-9.1
ZINC000008879403	-9.1
ZINC000009668499	-9.1
ZINC000012296515	-9.1
ZINC000012296920	-9.1
ZINC000012895461	-9.1
ZINC000012900626	-9.1
ZINC000013655372	-9.1
ZINC000017911473	-9.1
ZINC000020573515	-9.1
ZINC000020623794	-9.1
ZINC000020760935	-9.1
ZINC000020762756	-9.1
ZINC000021095374	-9.1
ZINC000027747016	-9.1
ZINC000027747024	-9.1
ZINC000032123936	-9.1
ZINC000032124206	-9.1
ZINC000032124400	-9.1
ZINC000034689318	-9.1
ZINC000036139388	-9.1
ZINC000036370048	-9.1
ZINC000040309010	-9.1
ZINC000040310053	-9.1
ZINC000040312473	-9.1
ZINC000041127953	-9.1
ZINC000041428388	-9.1
ZINC000042025246	-9.1
ZINC000057268629	-9.1
ZINC000062090016	-9.1
ZINC000065248739	-9.1
ZINC000065248827	-9.1
ZINC000065248829	-9.1
ZINC000065248835	-9.1
ZINC000072324441	-9.1
ZINC000074715541	-9.1
ZINC000253414997	-9.1
ZINC000000030231	-9
ZINC000000036322	-9
ZINC000000075055	-9
ZINC000000075063	-9
ZINC000000077982	-9
ZINC000000084016	-9
ZINC000000088393	-9
ZINC000000117155	-9
ZINC000000117162	-9
ZINC000000117941	-9
ZINC000000214503	-9
ZINC000000273797	-9
ZINC000000287767	-9
ZINC000000407802	-9
ZINC000000457518	-9
ZINC000000619505	-9
ZINC000000626134	-9
ZINC000000626395	-9
ZINC000000671043	-9
ZINC000000797605	-9
ZINC000000846863	-9
ZINC000000851402	-9
ZINC000000851790	-9
ZINC000000858419	-9
ZINC000000940122	-9
ZINC000000940124	-9
ZINC000001009415	-9
ZINC000001056072	-9
ZINC000001079435	-9
ZINC000001156352	-9
ZINC000001230512	-9
ZINC000001318428	-9
ZINC000001459962	-9
ZINC000002117358	-9
ZINC000002118094	-9
ZINC000002120125	-9
ZINC000002156096	-9
ZINC000002440299	-9
ZINC000002954357	-9
ZINC000003087481	-9
ZINC000003117430	-9
ZINC000003117431	-9
ZINC000003634344	-9
ZINC000003958696	-9
ZINC000003984924	-9
ZINC000004041116	-9
ZINC000004090436	-9
ZINC000004151766	-9
ZINC000004580100	-9
ZINC000004687314	-9
ZINC000004743640	-9
ZINC000004743653	-9
ZINC000005140805	-9
ZINC000005163220	-9
ZINC000005164114	-9
ZINC000006750389	-9
ZINC000006760322	-9
ZINC000006847728	-9
ZINC000006947046	-9
ZINC000008156839	-9
ZINC000011764554	-9
ZINC000012383592	-9
ZINC000012893479	-9
ZINC000012894375	-9
ZINC000012895520	-9
ZINC000012898325	-9
ZINC000013688865	-9
ZINC000015634188	-9
ZINC000016645732	-9
ZINC000020193380	-9
ZINC000020589218	-9
ZINC000020721992	-9
ZINC000020745249	-9
ZINC000021114899	-9
ZINC000021932812	-9
ZINC000022752975	-9
ZINC000023142687	-9
ZINC000026524149	-9
ZINC000031035270	-9
ZINC000035485099	-9
ZINC000036369806	-9
ZINC000036370049	-9
ZINC000038541161	-9
ZINC000038746550	-9
ZINC000040313037	-9
ZINC000062001349	-9
ZINC000062001410	-9
ZINC000064568301	-9
ZINC000064678933	-9
ZINC000064818391	-9
ZINC000064818409	-9
ZINC000065248686	-9
ZINC000072324467	-9
ZINC000072324736	-9
ZINC000072324853	-9
ZINC000079191880	-9
ZINC000079193450	-9
ZINC000082138166	-9
ZINC000085877114	-9
ZINC000096115712	-9
ZINC000096116085	-9
ZINC000096116098	-9
ZINC000263585734	-9
ZINC000000050302	-8.9
ZINC000000054796	-8.9
ZINC000000093725	-8.9
ZINC000000121773	-8.9
ZINC000000122544	-8.9
ZINC000000214590	-8.9
ZINC000000263599	-8.9
ZINC000000263629	-8.9
ZINC000000287711	-8.9
ZINC000000287773	-8.9
ZINC000000307989	-8.9
ZINC000000339819	-8.9
ZINC000000340372	-8.9
ZINC000000407129	-8.9
ZINC000000457522	-8.9
ZINC000000459362	-8.9
ZINC000000464304	-8.9
ZINC000000490460	-8.9
ZINC000000567111	-8.9
ZINC000000633911	-8.9
ZINC000000790601	-8.9
ZINC000000811636	-8.9
ZINC000000846624	-8.9
ZINC000000851762	-8.9
ZINC000000851800	-8.9
ZINC000000872109	-8.9
ZINC000000898099	-8.9
ZINC000000952696	-8.9
ZINC000000978483	-8.9
ZINC000001180854	-8.9
ZINC000001230614	-8.9
ZINC000001388104	-8.9
ZINC000002097966	-8.9
ZINC000002332533	-8.9
ZINC000002340369	-8.9
ZINC000002623960	-8.9
ZINC000002927553	-8.9
ZINC000002954356	-8.9
ZINC000004084925	-8.9
ZINC000004185236	-8.9
ZINC000004511289	-8.9
ZINC000004710851	-8.9
ZINC000004710854	-8.9
ZINC000004821129	-8.9
ZINC000005034246	-8.9
ZINC000005163216	-8.9
ZINC000005163698	-8.9
ZINC000005184209	-8.9
ZINC000005203961	-8.9
ZINC000005347406	-8.9
ZINC000006719986	-8.9
ZINC000006724282	-8.9
ZINC000006727258	-8.9
ZINC000006732688	-8.9
ZINC000006736815	-8.9
ZINC000006759497	-8.9
ZINC000006760504	-8.9
ZINC000007966947	-8.9
ZINC000007968746	-8.9
ZINC000008764270	-8.9
ZINC000008765016	-8.9
ZINC000009224897	-8.9
ZINC000009485381	-8.9
ZINC000009532155	-8.9
ZINC000009970585	-8.9
ZINC000011867272	-8.9
ZINC000012390210	-8.9
ZINC000012420464	-8.9
ZINC000012896650	-8.9
ZINC000012900838	-8.9
ZINC000014891020	-8.9
ZINC000015511616	-8.9
ZINC000015511641	-8.9
ZINC000015721906	-8.9
ZINC000016469236	-8.9
ZINC000018074513	-8.9
ZINC000019897822	-8.9
ZINC000019938173	-8.9
ZINC000020412466	-8.9
ZINC000020436649	-8.9
ZINC000020733688	-8.9
ZINC000022609257	-8.9
ZINC000034717612	-8.9
ZINC000035485065	-8.9
ZINC000036369966	-8.9
ZINC000040309154	-8.9
ZINC000040310026	-8.9
ZINC000040312427	-8.9
ZINC000040313185	-8.9
ZINC000049420906	-8.9
ZINC000054105913	-8.9
ZINC000057419387	-8.9
ZINC000062001586	-8.9
ZINC000062005039	-8.9
ZINC000063829072	-8.9
ZINC000064384165	-8.9
ZINC000064568272	-8.9
ZINC000064568304	-8.9
ZINC000070666235	-8.9
ZINC000070666561	-8.9
ZINC000070666610	-8.9
ZINC000072325058	-8.9
ZINC000072326105	-8.9
ZINC000079192767	-8.9
ZINC000085875089	-8.9
ZINC000096115529	-8.9
ZINC000096221709	-8.9
ZINC000096221891	-8.9
ZINC000181014801	-8.9
ZINC000000047236	-8.8
ZINC000000060717	-8.8
ZINC000000084013	-8.8
ZINC000000091600	-8.8
ZINC000000129501	-8.8
ZINC000000139294	-8.8
ZINC000000181785	-8.8
ZINC000000185016	-8.8
ZINC000000200908	-8.8
ZINC000000205891	-8.8
ZINC000000224861	-8.8
ZINC000000252942	-8.8
ZINC000000253114	-8.8
ZINC000000268624	-8.8
ZINC000000274151	-8.8
ZINC000000319130	-8.8
ZINC000000388180	-8.8
ZINC000000433184	-8.8
ZINC000000434079	-8.8
ZINC000000451439	-8.8
ZINC000000455859	-8.8
ZINC000000488975	-8.8
ZINC000000528975	-8.8
ZINC000000545897	-8.8
ZINC000000626451	-8.8
ZINC000000674222	-8.8
ZINC000000725545	-8.8
ZINC000000779530	-8.8
ZINC000000779539	-8.8
ZINC000000784164	-8.8
ZINC000000790589	-8.8
ZINC000000796549	-8.8
ZINC000000800005	-8.8
ZINC000000811628	-8.8
ZINC000000860279	-8.8
ZINC000000869721	-8.8
ZINC000000872110	-8.8
ZINC000000882730	-8.8
ZINC000001043658	-8.8
ZINC000001115949	-8.8
ZINC000001182734	-8.8
ZINC000001183226	-8.8
ZINC000001383820	-8.8
ZINC000001414401	-8.8
ZINC000001431477	-8.8
ZINC000001801245	-8.8
ZINC000001831994	-8.8
ZINC000002125110	-8.8
ZINC000002314305	-8.8
ZINC000002350392	-8.8
ZINC000002442605	-8.8
ZINC000002760562	-8.8
ZINC000002851302	-8.8
ZINC000002901550	-8.8
ZINC000002927517	-8.8
ZINC000002960168	-8.8
ZINC000003532866	-8.8
ZINC000003598836	-8.8
ZINC000003662054	-8.8
ZINC000003898361	-8.8
ZINC000003899577	-8.8
ZINC000004000394	-8.8
ZINC000004028582	-8.8
ZINC000004062163	-8.8
ZINC000004166992	-8.8
ZINC000004487689	-8.8
ZINC000004511287	-8.8
ZINC000004933099	-8.8
ZINC000005063606	-8.8
ZINC000005179869	-8.8
ZINC000005194973	-8.8
ZINC000005205909	-8.8
ZINC000005267760	-8.8
ZINC000005324266	-8.8
ZINC000005442715	-8.8
ZINC000006421318	-8.8
ZINC000006658757	-8.8
ZINC000006736835	-8.8
ZINC000006751924	-8.8
ZINC000006942860	-8.8
ZINC000006948145	-8.8
ZINC000007941110	-8.8
ZINC000008613762	-8.8
ZINC000008765080	-8.8
ZINC000008843814	-8.8
ZINC000008917212	-8.8
ZINC000009085200	-8.8
ZINC000010434758	-8.8
ZINC000011866008	-8.8
ZINC000012296849	-8.8
ZINC000012296850	-8.8
ZINC000012894021	-8.8
ZINC000012894938	-8.8
ZINC000012896637	-8.8
ZINC000015627354	-8.8
ZINC000015632981	-8.8
ZINC000015658352	-8.8
ZINC000015739216	-8.8
ZINC000016705926	-8.8
ZINC000019720165	-8.8
ZINC000019897818	-8.8
ZINC000019897819	-8.8
ZINC000019902223	-8.8
ZINC000020427691	-8.8
ZINC000020622823	-8.8
ZINC000020731356	-8.8
ZINC000020761444	-8.8
ZINC000020889873	-8.8
ZINC000021095335	-8.8
ZINC000027662189	-8.8
ZINC000027667724	-8.8
ZINC000027667836	-8.8
ZINC000027749433	-8.8
ZINC000027793096	-8.8
ZINC000031238808	-8.8
ZINC000031239566	-8.8
ZINC000032091280	-8.8
ZINC000032123824	-8.8
ZINC000032123999	-8.8
ZINC000032124196	-8.8
ZINC000038031717	-8.8
ZINC000040309072	-8.8
ZINC000040310251	-8.8
ZINC000040310308	-8.8
ZINC000040312888	-8.8
ZINC000040313090	-8.8
ZINC000041146470	-8.8
ZINC000041146472	-8.8
ZINC000049513423	-8.8
ZINC000049543708	-8.8
ZINC000056452575	-8.8
ZINC000057419992	-8.8
ZINC000060349748	-8.8
ZINC000065248720	-8.8
ZINC000070666586	-8.8
ZINC000072324913	-8.8
ZINC000075550723	-8.8
ZINC000079190036	-8.8
ZINC000085875063	-8.8
ZINC000085879196	-8.8
ZINC000096115530	-8.8
ZINC000096221803	-8.8
ZINC000096834554	-8.8
ZINC000000029950	-8.7
ZINC000000075050	-8.7
ZINC000000077299	-8.7
ZINC000000082732	-8.7
ZINC000000084773	-8.7
ZINC000000117038	-8.7
ZINC000000139296	-8.7
ZINC000000168652	-8.7
ZINC000000183749	-8.7
ZINC000000185010	-8.7
ZINC000000253015	-8.7
ZINC000000263653	-8.7
ZINC000000301757	-8.7
ZINC000000303384	-8.7
ZINC000000303500	-8.7
ZINC000000389336	-8.7
ZINC000000422917	-8.7
ZINC000000434185	-8.7
ZINC000000457454	-8.7
ZINC000000464051	-8.7
ZINC000000663198	-8.7
ZINC000000674221	-8.7
ZINC000000718336	-8.7
ZINC000000779527	-8.7
ZINC000000782969	-8.7
ZINC000000790591	-8.7
ZINC000000790603	-8.7
ZINC000000834044	-8.7
ZINC000000846901	-8.7
ZINC000000851758	-8.7
ZINC000000851783	-8.7
ZINC000000862857	-8.7
ZINC000000898145	-8.7
ZINC000000970804	-8.7
ZINC000001635386	-8.7
ZINC000002027915	-8.7
ZINC000002120006	-8.7
ZINC000002137347	-8.7
ZINC000002146465	-8.7
ZINC000002223842	-8.7
ZINC000002708392	-8.7
ZINC000002847132	-8.7
ZINC000002927518	-8.7
ZINC000002927642	-8.7
ZINC000003019221	-8.7
ZINC000003598839	-8.7
ZINC000004084926	-8.7
ZINC000004089576	-8.7
ZINC000004162883	-8.7
ZINC000004171960	-8.7
ZINC000004487700	-8.7
ZINC000004661567	-8.7
ZINC000004783178	-8.7
ZINC000004826940	-8.7
ZINC000004880450	-8.7
ZINC000005347408	-8.7
ZINC000005347522	-8.7
ZINC000005395036	-8.7
ZINC000006428244	-8.7
ZINC000006660177	-8.7
ZINC000006942805	-8.7
ZINC000006945838	-8.7
ZINC000007608976	-8.7
ZINC000007609872	-8.7
ZINC000008331791	-8.7
ZINC000008487863	-8.7
ZINC000008764460	-8.7
ZINC000008764696	-8.7
ZINC000008765338	-8.7
ZINC000008917444	-8.7
ZINC000009184550	-8.7
ZINC000009614689	-8.7
ZINC000009776582	-8.7
ZINC000010146618	-8.7
ZINC000010434760	-8.7
ZINC000011689918	-8.7
ZINC000011865129	-8.7
ZINC000012893432	-8.7
ZINC000012895139	-8.7
ZINC000012901690	-8.7
ZINC000014890901	-8.7
ZINC000015511559	-8.7
ZINC000015634041	-8.7
ZINC000015721863	-8.7
ZINC000016626252	-8.7
ZINC000016850754	-8.7
ZINC000017911472	-8.7
ZINC000017911520	-8.7
ZINC000017911589	-8.7
ZINC000019781684	-8.7
ZINC000019781727	-8.7
ZINC000020348995	-8.7
ZINC000020427677	-8.7
ZINC000020610098	-8.7
ZINC000020761521	-8.7
ZINC000021175073	-8.7
ZINC000022468380	-8.7
ZINC000023973401	-8.7
ZINC000023973405	-8.7
ZINC000027662042	-8.7
ZINC000027662187	-8.7
ZINC000027749413	-8.7
ZINC000027793098	-8.7
ZINC000031239902	-8.7
ZINC000031775768	-8.7
ZINC000032124320	-8.7
ZINC000032124524	-8.7
ZINC000035485066	-8.7
ZINC000036369849	-8.7
ZINC000040310009	-8.7
ZINC000040310270	-8.7
ZINC000040313049	-8.7
ZINC000056452804	-8.7
ZINC000062001299	-8.7
ZINC000062001579	-8.7
ZINC000065248715	-8.7
ZINC000065248888	-8.7
ZINC000072324910	-8.7
ZINC000072325608	-8.7
ZINC000079189544	-8.7
ZINC000085876604	-8.7
ZINC000096221940	-8.7
ZINC000096222257	-8.7
ZINC000101453177	-8.7
ZINC000191005053	-8.7
ZINC000000025570	-8.6
ZINC000000029936	-8.6
ZINC000000030016	-8.6
ZINC000000037946	-8.6
ZINC000000048966	-8.6
ZINC000000053903	-8.6
ZINC000000073853	-8.6
ZINC000000093238	-8.6
ZINC000000121705	-8.6
ZINC000000123440	-8.6
ZINC000000129499	-8.6
ZINC000000139058	-8.6
ZINC000000176897	-8.6
ZINC000000200921	-8.6
ZINC000000203256	-8.6
ZINC000000204260	-8.6
ZINC000000206445	-8.6
ZINC000000212487	-8.6
ZINC000000235875	-8.6
ZINC000000252954	-8.6
ZINC000000253439	-8.6
ZINC000000258631	-8.6
ZINC000000261835	-8.6
ZINC000000263687	-8.6
ZINC000000265220	-8.6
ZINC000000265221	-8.6
ZINC000000265224	-8.6
ZINC000000312499	-8.6
ZINC000000451617	-8.6
ZINC000000457424	-8.6
ZINC000000466407	-8.6
ZINC000000488054	-8.6
ZINC000000526112	-8.6
ZINC000000526760	-8.6
ZINC000000636759	-8.6
ZINC000000640096	-8.6
ZINC000000645771	-8.6
ZINC000000815175	-8.6
ZINC000000839113	-8.6
ZINC000000851757	-8.6
ZINC000000851764	-8.6
ZINC000000852673	-8.6
ZINC000000893185	-8.6
ZINC000000893203	-8.6
ZINC000000940063	-8.6
ZINC000000947080	-8.6
ZINC000000953723	-8.6
ZINC000000973911	-8.6
ZINC000001043659	-8.6
ZINC000001061006	-8.6
ZINC000001061484	-8.6
ZINC000001156429	-8.6
ZINC000001326078	-8.6
ZINC000001459963	-8.6
ZINC000001774455	-8.6
ZINC000001776401	-8.6
ZINC000001831688	-8.6
ZINC000001831993	-8.6
ZINC000002112713	-8.6
ZINC000002150596	-8.6
ZINC000002219622	-8.6
ZINC000002361668	-8.6
ZINC000002494787	-8.6
ZINC000002534555	-8.6
ZINC000002708394	-8.6
ZINC000002723188	-8.6
ZINC000002898724	-8.6
ZINC000002902000	-8.6
ZINC000002989570	-8.6
ZINC000003038242	-8.6
ZINC000003117428	-8.6
ZINC000003493707	-8.6
ZINC000003897007	-8.6
ZINC000004487666	-8.6
ZINC000004681690	-8.6
ZINC000004743330	-8.6
ZINC000004743646	-8.6
ZINC000004754367	-8.6
ZINC000004880505	-8.6
ZINC000004933305	-8.6
ZINC000005034242	-8.6
ZINC000005184167	-8.6
ZINC000005307695	-8.6
ZINC000005322696	-8.6
ZINC000005346547	-8.6
ZINC000005378510	-8.6
ZINC000006624204	-8.6
ZINC000006658756	-8.6
ZINC000006661639	-8.6
ZINC000006756093	-8.6
ZINC000006766255	-8.6
ZINC000006767084	-8.6
ZINC000006767783	-8.6
ZINC000006917892	-8.6
ZINC000006947087	-8.6
ZINC000007971486	-8.6
ZINC000008014216	-8.6
ZINC000008276825	-8.6
ZINC000008287180	-8.6
ZINC000008764721	-8.6
ZINC000008764985	-8.6
ZINC000008765339	-8.6
ZINC000008916786	-8.6
ZINC000008916787	-8.6
ZINC000008916954	-8.6
ZINC000008917446	-8.6
ZINC000009095536	-8.6
ZINC000011605144	-8.6
ZINC000012421821	-8.6
ZINC000012861531	-8.6
ZINC000012901525	-8.6
ZINC000013557241	-8.6
ZINC000014987932	-8.6
ZINC000015721861	-8.6
ZINC000015789798	-8.6
ZINC000016753970	-8.6
ZINC000018157712	-8.6
ZINC000019237228	-8.6
ZINC000019720438	-8.6
ZINC000019897885	-8.6
ZINC000019897920	-8.6
ZINC000019902225	-8.6
ZINC000020547066	-8.6
ZINC000020762090	-8.6
ZINC000021095319	-8.6
ZINC000027662051	-8.6
ZINC000027667629	-8.6
ZINC000027667834	-8.6
ZINC000027746404	-8.6
ZINC000027794412	-8.6
ZINC000030654091	-8.6
ZINC000031035431	-8.6
ZINC000031948984	-8.6
ZINC000032123933	-8.6
ZINC000032124189	-8.6
ZINC000032124408	-8.6
ZINC000032200440	-8.6
ZINC000032540773	-8.6
ZINC000034191060	-8.6
ZINC000035363889	-8.6
ZINC000035514690	-8.6
ZINC000035802400	-8.6
ZINC000036369859	-8.6
ZINC000036370039	-8.6
ZINC000036370067	-8.6
ZINC000040309257	-8.6
ZINC000040312544	-8.6
ZINC000040312660	-8.6
ZINC000049420907	-8.6
ZINC000054105911	-8.6
ZINC000055044019	-8.6
ZINC000062001517	-8.6
ZINC000062005038	-8.6
ZINC000065248684	-8.6
ZINC000065248706	-8.6
ZINC000070666344	-8.6
ZINC000070666507	-8.6
ZINC000079189063	-8.6
ZINC000082138167	-8.6
ZINC000170625752	-8.6
ZINC000217689178	-8.6
ZINC000000030032	-8.5
ZINC000000042678	-8.5
ZINC000000047661	-8.5
ZINC000000052258	-8.5
ZINC000000057384	-8.5
ZINC000000058774	-8.5
ZINC000000058775	-8.5
ZINC000000130061	-8.5
ZINC000000133071	-8.5
ZINC000000167142	-8.5
ZINC000000189406	-8.5
ZINC000000217204	-8.5
ZINC000000226663	-8.5
ZINC000000257787	-8.5
ZINC000000288369	-8.5
ZINC000000288797	-8.5
ZINC000000294013	-8.5
ZINC000000303757	-8.5
ZINC000000308124	-8.5
ZINC000000311644	-8.5
ZINC000000381091	-8.5
ZINC000000405248	-8.5
ZINC000000430322	-8.5
ZINC000000457423	-8.5
ZINC000000457519	-8.5
ZINC000000486262	-8.5
ZINC000000487469	-8.5
ZINC000000489425	-8.5
ZINC000000626078	-8.5
ZINC000000626132	-8.5
ZINC000000662309	-8.5
ZINC000000851782	-8.5
ZINC000000947759	-8.5
ZINC000000951037	-8.5
ZINC000001095603	-8.5
ZINC000001140988	-8.5
ZINC000001158461	-8.5
ZINC000001164955	-8.5
ZINC000001189611	-8.5
ZINC000001857016	-8.5
ZINC000002105433	-8.5
ZINC000002117097	-8.5
ZINC000002125178	-8.5
ZINC000002130040	-8.5
ZINC000002145303	-8.5
ZINC000002205059	-8.5
ZINC000002262654	-8.5
ZINC000002380258	-8.5
ZINC000002739191	-8.5
ZINC000002774536	-8.5
ZINC000002829673	-8.5
ZINC000002873306	-8.5
ZINC000002874610	-8.5
ZINC000002927573	-8.5
ZINC000003908306	-8.5
ZINC000004409957	-8.5
ZINC000004526333	-8.5
ZINC000004740494	-8.5
ZINC000004743677	-8.5
ZINC000004821016	-8.5
ZINC000005345416	-8.5
ZINC000005351131	-8.5
ZINC000006122773	-8.5
ZINC000006623933	-8.5
ZINC000006677896	-8.5
ZINC000006700718	-8.5
ZINC000006736847	-8.5
ZINC000006767083	-8.5
ZINC000006767483	-8.5
ZINC000006917981	-8.5
ZINC000006942858	-8.5
ZINC000008014217	-8.5
ZINC000008490996	-8.5
ZINC000008613760	-8.5
ZINC000008764771	-8.5
ZINC000008764927	-8.5
ZINC000008764971	-8.5
ZINC000008765081	-8.5
ZINC000008916953	-8.5
ZINC000008917213	-8.5
ZINC000008917443	-8.5
ZINC000008997481	-8.5
ZINC000009940895	-8.5
ZINC000010816916	-8.5
ZINC000012062834	-8.5
ZINC000012063020	-8.5
ZINC000012296848	-8.5
ZINC000012377443	-8.5
ZINC000012894114	-8.5
ZINC000013682180	-8.5
ZINC000015721882	-8.5
ZINC000016753968	-8.5
ZINC000017127731	-8.5
ZINC000017911588	-8.5
ZINC000017917305	-8.5
ZINC000019564589	-8.5
ZINC000019565308	-8.5
ZINC000019565317	-8.5
ZINC000019595043	-8.5
ZINC000019735183	-8.5
ZINC000019897823	-8.5
ZINC000019897830	-8.5
ZINC000020763563	-8.5
ZINC000021168734	-8.5
ZINC000022468168	-8.5
ZINC000023973566	-8.5
ZINC000027662043	-8.5
ZINC000027662049	-8.5
ZINC000027664000	-8.5
ZINC000027667631	-8.5
ZINC000027667725	-8.5
ZINC000027746398	-8.5
ZINC000027749442	-8.5
ZINC000027793184	-8.5
ZINC000027794415	-8.5
ZINC000028288167	-8.5
ZINC000031437092	-8.5
ZINC000032124514	-8.5
ZINC000032491914	-8.5
ZINC000040309308	-8.5
ZINC000040312825	-8.5
ZINC000040313055	-8.5
ZINC000062001589	-8.5
ZINC000062001786	-8.5
ZINC000062001856	-8.5
ZINC000065248812	-8.5
ZINC000070666404	-8.5
ZINC000070666405	-8.5
ZINC000072324874	-8.5
ZINC000072325291	-8.5
ZINC000072326064	-8.5
ZINC000085875067	-8.5
ZINC000085876933	-8.5
ZINC000096115940	-8.5
ZINC000170625487	-8.5
ZINC000230209518	-8.5
ZINC000253401654	-8.5
ZINC000000049207	-8.4
ZINC000000051236	-8.4
ZINC000000051478	-8.4
ZINC000000057125	-8.4
ZINC000000066503	-8.4
ZINC000000067887	-8.4
ZINC000000073848	-8.4
ZINC000000075756	-8.4
ZINC000000085855	-8.4
ZINC000000128748	-8.4
ZINC000000139291	-8.4
ZINC000000149852	-8.4
ZINC000000170614	-8.4
ZINC000000212481	-8.4
ZINC000000246205	-8.4
ZINC000000258190	-8.4
ZINC000000258573	-8.4
ZINC000000258674	-8.4
ZINC000000260264	-8.4
ZINC000000261828	-8.4
ZINC000000268344	-8.4
ZINC000000285367	-8.4
ZINC000000293660	-8.4
ZINC000000303763	-8.4
ZINC000000303965	-8.4
ZINC000000309702	-8.4
ZINC000000314646	-8.4
ZINC000000319500	-8.4
ZINC000000489352	-8.4
ZINC000000528977	-8.4
ZINC000000645767	-8.4
ZINC000000774899	-8.4
ZINC000000790595	-8.4
ZINC000000818841	-8.4
ZINC000000824756	-8.4
ZINC000000824757	-8.4
ZINC000000860141	-8.4
ZINC000000872106	-8.4
ZINC000000893162	-8.4
ZINC000001067102	-8.4
ZINC000001137359	-8.4
ZINC000001140301	-8.4
ZINC000001253313	-8.4
ZINC000001428655	-8.4
ZINC000001593750	-8.4
ZINC000001730671	-8.4
ZINC000001770388	-8.4
ZINC000001782740	-8.4
ZINC000001782741	-8.4
ZINC000002097892	-8.4
ZINC000002130508	-8.4
ZINC000002147553	-8.4
ZINC000002380264	-8.4
ZINC000002380283	-8.4
ZINC000002435963	-8.4
ZINC000002464235	-8.4
ZINC000002860352	-8.4
ZINC000002864653	-8.4
ZINC000002927523	-8.4
ZINC000003020051	-8.4
ZINC000003061940	-8.4
ZINC000003117429	-8.4
ZINC000004121118	-8.4
ZINC000004550514	-8.4
ZINC000004590889	-8.4
ZINC000004673507	-8.4
ZINC000004691218	-8.4
ZINC000004731619	-8.4
ZINC000004777225	-8.4
ZINC000004867717	-8.4
ZINC000004881007	-8.4
ZINC000004943594	-8.4
ZINC000004992595	-8.4
ZINC000005157016	-8.4
ZINC000005378372	-8.4
ZINC000005960296	-8.4
ZINC000006170743	-8.4
ZINC000006660179	-8.4
ZINC000006662507	-8.4
ZINC000006760720	-8.4
ZINC000006917884	-8.4
ZINC000006947183	-8.4
ZINC000007608245	-8.4
ZINC000008134493	-8.4
ZINC000008764452	-8.4
ZINC000008765178	-8.4
ZINC000008916957	-8.4
ZINC000008990766	-8.4
ZINC000011689965	-8.4
ZINC000012062833	-8.4
ZINC000012371690	-8.4
ZINC000012391442	-8.4
ZINC000012662276	-8.4
ZINC000012895148	-8.4
ZINC000013570997	-8.4
ZINC000013722995	-8.4
ZINC000015424180	-8.4
ZINC000015721884	-8.4
ZINC000015867426	-8.4
ZINC000016192612	-8.4
ZINC000017845831	-8.4
ZINC000019235034	-8.4
ZINC000019537586	-8.4
ZINC000019595048	-8.4
ZINC000019897829	-8.4
ZINC000020394211	-8.4
ZINC000020427682	-8.4
ZINC000020761399	-8.4
ZINC000020763527	-8.4
ZINC000020889869	-8.4
ZINC000021911945	-8.4
ZINC000022468127	-8.4
ZINC000022468146	-8.4
ZINC000023973569	-8.4
ZINC000027667710	-8.4
ZINC000027667712	-8.4
ZINC000031437095	-8.4
ZINC000032124448	-8.4
ZINC000034651227	-8.4
ZINC000040309469	-8.4
ZINC000040310012	-8.4
ZINC000040312963	-8.4
ZINC000041146468	-8.4
ZINC000041296414	-8.4
ZINC000048375995	-8.4
ZINC000054297640	-8.4
ZINC000056452037	-8.4
ZINC000062001442	-8.4
ZINC000062001515	-8.4
ZINC000062001785	-8.4
ZINC000062001855	-8.4
ZINC000065248700	-8.4
ZINC000070666587	-8.4
ZINC000070666648	-8.4
ZINC000072326109	-8.4
ZINC000075437336	-8.4
ZINC000079196745	-8.4
ZINC000082138161	-8.4
ZINC000082138162	-8.4
ZINC000096114044	-8.4
ZINC000000029645	-8.3
ZINC000000029911	-8.3
ZINC000000029974	-8.3
ZINC000000030012	-8.3
ZINC000000030164	-8.3
ZINC000000037033	-8.3
ZINC000000037926	-8.3
ZINC000000042677	-8.3
ZINC000000043912	-8.3
ZINC000000047229	-8.3
ZINC000000047667	-8.3
ZINC000000063712	-8.3
ZINC000000067922	-8.3
ZINC000000077536	-8.3
ZINC000000077540	-8.3
ZINC000000077856	-8.3
ZINC000000082960	-8.3
ZINC000000121330	-8.3
ZINC000000127857	-8.3
ZINC000000162989	-8.3
ZINC000000163007	-8.3
ZINC000000168970	-8.3
ZINC000000183870	-8.3
ZINC000000195377	-8.3
ZINC000000200919	-8.3
ZINC000000202241	-8.3
ZINC000000210701	-8.3
ZINC000000262522	-8.3
ZINC000000265222	-8.3
ZINC000000271688	-8.3
ZINC000000284207	-8.3
ZINC000000289917	-8.3
ZINC000000290995	-8.3
ZINC000000294209	-8.3
ZINC000000294730	-8.3
ZINC000000303350	-8.3
ZINC000000303635	-8.3
ZINC000000303913	-8.3
ZINC000000318757	-8.3
ZINC000000318791	-8.3
ZINC000000394916	-8.3
ZINC000000437169	-8.3
ZINC000000456872	-8.3
ZINC000000459526	-8.3
ZINC000000465410	-8.3
ZINC000000465744	-8.3
ZINC000000466323	-8.3
ZINC000000487729	-8.3
ZINC000000489005	-8.3
ZINC000000661173	-8.3
ZINC000000782991	-8.3
ZINC000000789521	-8.3
ZINC000000790598	-8.3
ZINC000000851803	-8.3
ZINC000000860107	-8.3
ZINC000000860155	-8.3
ZINC000000872105	-8.3
ZINC000000893196	-8.3
ZINC000000973204	-8.3
ZINC000000978484	-8.3
ZINC000001076066	-8.3
ZINC000001132058	-8.3
ZINC000001147793	-8.3
ZINC000001168913	-8.3
ZINC000001177436	-8.3
ZINC000001206269	-8.3
ZINC000001227158	-8.3
ZINC000001470738	-8.3
ZINC000001470745	-8.3
ZINC000001615443	-8.3
ZINC000001750389	-8.3
ZINC000001773231	-8.3
ZINC000001774172	-8.3
ZINC000002139078	-8.3
ZINC000002156211	-8.3
ZINC000002225665	-8.3
ZINC000002433715	-8.3
ZINC000002836315	-8.3
ZINC000002864579	-8.3
ZINC000002864603	-8.3
ZINC000002882062	-8.3
ZINC000002927614	-8.3
ZINC000002940408	-8.3
ZINC000002998809	-8.3
ZINC000003623313	-8.3
ZINC000003958689	-8.3
ZINC000004042308	-8.3
ZINC000004071072	-8.3
ZINC000004084526	-8.3
ZINC000004084527	-8.3
ZINC000004087671	-8.3
ZINC000004166988	-8.3
ZINC000004409962	-8.3
ZINC000004487694	-8.3
ZINC000004671965	-8.3
ZINC000004728143	-8.3
ZINC000004731668	-8.3
ZINC000004740491	-8.3
ZINC000004740496	-8.3
ZINC000004814474	-8.3
ZINC000005034266	-8.3
ZINC000005157014	-8.3
ZINC000005208042	-8.3
ZINC000005217324	-8.3
ZINC000005272523	-8.3
ZINC000006947229	-8.3
ZINC000007006309	-8.3
ZINC000007770866	-8.3
ZINC000008135953	-8.3
ZINC000008869947	-8.3
ZINC000008879429	-8.3
ZINC000009532029	-8.3
ZINC000009776584	-8.3
ZINC000011535882	-8.3
ZINC000011865976	-8.3
ZINC000012296847	-8.3
ZINC000012383591	-8.3
ZINC000012446800	-8.3
ZINC000012662315	-8.3
ZINC000012897764	-8.3
ZINC000015721630	-8.3
ZINC000015721829	-8.3
ZINC000016850764	-8.3
ZINC000017440578	-8.3
ZINC000017911475	-8.3
ZINC000017911521	-8.3
ZINC000018266194	-8.3
ZINC000019851160	-8.3
ZINC000019872542	-8.3
ZINC000019897816	-8.3
ZINC000019897817	-8.3
ZINC000019897831	-8.3
ZINC000019897919	-8.3
ZINC000019902252	-8.3
ZINC000020149715	-8.3
ZINC000020547507	-8.3
ZINC000021798703	-8.3
ZINC000021798708	-8.3
ZINC000021911904	-8.3
ZINC000021911908	-8.3
ZINC000021911914	-8.3
ZINC000022468121	-8.3
ZINC000022468174	-8.3
ZINC000027581500	-8.3
ZINC000027749423	-8.3
ZINC000032124344	-8.3
ZINC000032124518	-8.3
ZINC000035514688	-8.3
ZINC000036369940	-8.3
ZINC000036370090	-8.3
ZINC000038516596	-8.3
ZINC000040308996	-8.3
ZINC000040309125	-8.3
ZINC000040309997	-8.3
ZINC000040310314	-8.3
ZINC000040310323	-8.3
ZINC000045130783	-8.3
ZINC000049409974	-8.3
ZINC000062001350	-8.3
ZINC000062001828	-8.3
ZINC000064580904	-8.3
ZINC000064677375	-8.3
ZINC000065248698	-8.3
ZINC000065248699	-8.3
ZINC000065248725	-8.3
ZINC000072324623	-8.3
ZINC000072325869	-8.3
ZINC000072326144	-8.3
ZINC000079188768	-8.3
ZINC000080790821	-8.3
ZINC000085879126	-8.3
ZINC000095348656	-8.3
ZINC000096113786	-8.3
ZINC000217919859	-8.3
ZINC000217919943	-8.3
ZINC000230209524	-8.3
ZINC000000029927	-8.2
ZINC000000030553	-8.2
ZINC000000030767	-8.2
ZINC000000050301	-8.2
ZINC000000051061	-8.2
ZINC000000051235	-8.2
ZINC000000056773	-8.2
ZINC000000073789	-8.2
ZINC000000078829	-8.2
ZINC000000094353	-8.2
ZINC000000101628	-8.2
ZINC000000116331	-8.2
ZINC000000121711	-8.2
ZINC000000121785	-8.2
ZINC000000128609	-8.2
ZINC000000128782	-8.2
ZINC000000150904	-8.2
ZINC000000187413	-8.2
ZINC000000188569	-8.2
ZINC000000199656	-8.2
ZINC000000212473	-8.2
ZINC000000252998	-8.2
ZINC000000258186	-8.2
ZINC000000258922	-8.2
ZINC000000263644	-8.2
ZINC000000272845	-8.2
ZINC000000294101	-8.2
ZINC000000362418	-8.2
ZINC000000433183	-8.2
ZINC000000434716	-8.2
ZINC000000443952	-8.2
ZINC000000445415	-8.2
ZINC000000445535	-8.2
ZINC000000525729	-8.2
ZINC000000526252	-8.2
ZINC000000682205	-8.2
ZINC000000851780	-8.2
ZINC000000851801	-8.2
ZINC000000859108	-8.2
ZINC000000860277	-8.2
ZINC000000892816	-8.2
ZINC000000946923	-8.2
ZINC000000947087	-8.2
ZINC000001103465	-8.2
ZINC000001140989	-8.2
ZINC000001428654	-8.2
ZINC000001770383	-8.2
ZINC000001771928	-8.2
ZINC000001848107	-8.2
ZINC000002063830	-8.2
ZINC000002097661	-8.2
ZINC000002102995	-8.2
ZINC000002140469	-8.2
ZINC000002149920	-8.2
ZINC000002149921	-8.2
ZINC000002181414	-8.2
ZINC000002223843	-8.2
ZINC000002430871	-8.2
ZINC000002484265	-8.2
ZINC000002610313	-8.2
ZINC000002748138	-8.2
ZINC000002883519	-8.2
ZINC000002910499	-8.2
ZINC000002991806	-8.2
ZINC000004027407	-8.2
ZINC000004085056	-8.2
ZINC000004328256	-8.2
ZINC000004353955	-8.2
ZINC000004673412	-8.2
ZINC000004740655	-8.2
ZINC000004740664	-8.2
ZINC000004770238	-8.2
ZINC000005346677	-8.2
ZINC000005680671	-8.2
ZINC000005960278	-8.2
ZINC000005960281	-8.2
ZINC000006659337	-8.2
ZINC000006920168	-8.2
ZINC000006946433	-8.2
ZINC000006947018	-8.2
ZINC000006947032	-8.2
ZINC000007000021	-8.2
ZINC000008490995	-8.2
ZINC000008734454	-8.2
ZINC000008739328	-8.2
ZINC000008764703	-8.2
ZINC000008828717	-8.2
ZINC000008916956	-8.2
ZINC000009379650	-8.2
ZINC000009776583	-8.2
ZINC000010146608	-8.2
ZINC000012063019	-8.2
ZINC000012371691	-8.2
ZINC000012898013	-8.2
ZINC000013259981	-8.2
ZINC000013534584	-8.2
ZINC000014153647	-8.2
ZINC000015423506	-8.2
ZINC000015769342	-8.2
ZINC000016753972	-8.2
ZINC000016753975	-8.2
ZINC000017911474	-8.2
ZINC000019606453	-8.2
ZINC000019720612	-8.2
ZINC000019781772	-8.2
ZINC000019902227	-8.2
ZINC000021883190	-8.2
ZINC000021911910	-8.2
ZINC000021911941	-8.2
ZINC000027581507	-8.2
ZINC000027793187	-8.2
ZINC000028288164	-8.2
ZINC000032657689	-8.2
ZINC000036369838	-8.2
ZINC000040309887	-8.2
ZINC000040313052	-8.2
ZINC000040313312	-8.2
ZINC000042228347	-8.2
ZINC000044652242	-8.2
ZINC000048935555	-8.2
ZINC000062001514	-8.2
ZINC000065248685	-8.2
ZINC000065248707	-8.2
ZINC000065248722	-8.2
ZINC000065248723	-8.2
ZINC000072325745	-8.2
ZINC000075437297	-8.2
ZINC000079189062	-8.2
ZINC000085874716	-8.2
ZINC000085877063	-8.2
ZINC000095473130	-8.2
ZINC000096115459	-8.2
ZINC000096222339	-8.2
ZINC000100305206	-8.2
ZINC000136774179	-8.2
ZINC000217595213	-8.2
ZINC000217656476	-8.2
ZINC000000029956	-8.1
ZINC000000036037	-8.1
ZINC000000036046	-8.1
ZINC000000036558	-8.1
ZINC000000037324	-8.1
ZINC000000049465	-8.1
ZINC000000056758	-8.1
ZINC000000056772	-8.1
ZINC000000071284	-8.1
ZINC000000077860	-8.1
ZINC000000087123	-8.1
ZINC000000101578	-8.1
ZINC000000128522	-8.1
ZINC000000167151	-8.1
ZINC000000168547	-8.1
ZINC000000183691	-8.1
ZINC000000183903	-8.1
ZINC000000184586	-8.1
ZINC000000188482	-8.1
ZINC000000189099	-8.1
ZINC000000208127	-8.1
ZINC000000225001	-8.1
ZINC000000263668	-8.1
ZINC000000299896	-8.1
ZINC000000303107	-8.1
ZINC000000319492	-8.1
ZINC000000372650	-8.1
ZINC000000445534	-8.1
ZINC000000467045	-8.1
ZINC000000470065	-8.1
ZINC000000477778	-8.1
ZINC000000520171	-8.1
ZINC000000620044	-8.1
ZINC000000677522	-8.1
ZINC000000818842	-8.1
ZINC000000860140	-8.1
ZINC000000893134	-8.1
ZINC000000985047	-8.1
ZINC000000996226	-8.1
ZINC000001097941	-8.1
ZINC000001227160	-8.1
ZINC000001453822	-8.1
ZINC000001750406	-8.1
ZINC000001774456	-8.1
ZINC000001793738	-8.1
ZINC000002087287	-8.1
ZINC000002096710	-8.1
ZINC000002103800	-8.1
ZINC000002145307	-8.1
ZINC000002188661	-8.1
ZINC000002191012	-8.1
ZINC000002802076	-8.1
ZINC000002811830	-8.1
ZINC000002851931	-8.1
ZINC000002870070	-8.1
ZINC000002927593	-8.1
ZINC000002933452	-8.1
ZINC000002989963	-8.1
ZINC000003019327	-8.1
ZINC000003029286	-8.1
ZINC000003089782	-8.1
ZINC000003117188	-8.1
ZINC000003155965	-8.1
ZINC000003645863	-8.1
ZINC000004090069	-8.1
ZINC000004173627	-8.1
ZINC000004339906	-8.1
ZINC000004472972	-8.1
ZINC000004478683	-8.1
ZINC000004539378	-8.1
ZINC000004740656	-8.1
ZINC000005217329	-8.1
ZINC000005323042	-8.1
ZINC000005782792	-8.1
ZINC000005960276	-8.1
ZINC000006659778	-8.1
ZINC000006661189	-8.1
ZINC000006736823	-8.1
ZINC000006760482	-8.1
ZINC000006766260	-8.1
ZINC000006917970	-8.1
ZINC000006947166	-8.1
ZINC000007005316	-8.1
ZINC000008739329	-8.1
ZINC000008782368	-8.1
ZINC000008783043	-8.1
ZINC000008869946	-8.1
ZINC000008917445	-8.1
ZINC000009419283	-8.1
ZINC000010272773	-8.1
ZINC000012371832	-8.1
ZINC000012390160	-8.1
ZINC000012858183	-8.1
ZINC000016029211	-8.1
ZINC000016850760	-8.1
ZINC000016960169	-8.1
ZINC000019787114	-8.1
ZINC000019804924	-8.1
ZINC000019897832	-8.1
ZINC000019897886	-8.1
ZINC000020740781	-8.1
ZINC000023142442	-8.1
ZINC000023193239	-8.1
ZINC000031035874	-8.1
ZINC000032123846	-8.1
ZINC000032124098	-8.1
ZINC000033422042	-8.1
ZINC000040312711	-8.1
ZINC000040312934	-8.1
ZINC000040312999	-8.1
ZINC000041751762	-8.1
ZINC000057419423	-8.1
ZINC000060349754	-8.1
ZINC000062001451	-8.1
ZINC000065248721	-8.1
ZINC000070666459	-8.1
ZINC000072325188	-8.1
ZINC000072326103	-8.1
ZINC000072326107	-8.1
ZINC000075157256	-8.1
ZINC000075437380	-8.1
ZINC000080792687	-8.1
ZINC000085879182	-8.1
ZINC000096114257	-8.1
ZINC000000029649	-8
ZINC000000036001	-8
ZINC000000037223	-8
ZINC000000037563	-8
ZINC000000043178	-8
ZINC000000044431	-8
ZINC000000047682	-8
ZINC000000052126	-8
ZINC000000060228	-8
ZINC000000073278	-8
ZINC000000097599	-8
ZINC000000101633	-8
ZINC000000104215	-8
ZINC000000128823	-8
ZINC000000176707	-8
ZINC000000183254	-8
ZINC000000193375	-8
ZINC000000195381	-8
ZINC000000210345	-8
ZINC000000224876	-8
ZINC000000245322	-8
ZINC000000258917	-8
ZINC000000262537	-8
ZINC000000267823	-8
ZINC000000270124	-8
ZINC000000273798	-8
ZINC000000284204	-8
ZINC000000349952	-8
ZINC000000397608	-8
ZINC000000445165	-8
ZINC000000641902	-8
ZINC000000780272	-8
ZINC000000798517	-8
ZINC000000870600	-8
ZINC000000947079	-8
ZINC000001049568	-8
ZINC000001216272	-8
ZINC000001230435	-8
ZINC000001457091	-8
ZINC000001687151	-8
ZINC000001735630	-8
ZINC000001851949	-8
ZINC000002097402	-8
ZINC000002097891	-8
ZINC000002317234	-8
ZINC000002528942	-8
ZINC000002571595	-8
ZINC000002578310	-8
ZINC000002596069	-8
ZINC000002743379	-8
ZINC000002780062	-8
ZINC000002847015	-8
ZINC000002854746	-8
ZINC000002860321	-8
ZINC000002864762	-8
ZINC000002870303	-8
ZINC000002899145	-8
ZINC000002927574	-8
ZINC000002927581	-8
ZINC000003019313	-8
ZINC000003439883	-8
ZINC000003614799	-8
ZINC000003617024	-8
ZINC000003900165	-8
ZINC000003999682	-8
ZINC000004084495	-8
ZINC000004122329	-8
ZINC000004187298	-8
ZINC000004342707	-8
ZINC000004342709	-8
ZINC000004342713	-8
ZINC000004487683	-8
ZINC000004660727	-8
ZINC000004731617	-8
ZINC000004740610	-8
ZINC000004814545	-8
ZINC000004933309	-8
ZINC000005005844	-8
ZINC000005184903	-8
ZINC000005378112	-8
ZINC000005960271	-8
ZINC000006285265	-8
ZINC000006490294	-8
ZINC000006660113	-8
ZINC000006728901	-8
ZINC000006751102	-8
ZINC000006760505	-8
ZINC000006810057	-8
ZINC000006917932	-8
ZINC000006946530	-8
ZINC000006947039	-8
ZINC000008879315	-8
ZINC000011865974	-8
ZINC000011916204	-8
ZINC000011916604	-8
ZINC000012296516	-8
ZINC000012417915	-8
ZINC000016850779	-8
ZINC000019235031	-8
ZINC000019237230	-8
ZINC000019536559	-8
ZINC000019606455	-8
ZINC000019781745	-8
ZINC000019840628	-8
ZINC000020132981	-8
ZINC000022468162	-8
ZINC000022609406	-8
ZINC000032124252	-8
ZINC000036370023	-8
ZINC000036611944	-8
ZINC000037432649	-8
ZINC000037434476	-8
ZINC000040313233	-8
ZINC000049543474	-8
ZINC000055253349	-8
ZINC000072325228	-8
ZINC000075157255	-8
ZINC000096114266	-8
ZINC000170625767	-8
ZINC000218085683	-8
ZINC000253412588	-8
ZINC000000026546	-7.9
ZINC000000030015	-7.9
ZINC000000044432	-7.9
ZINC000000053904	-7.9
ZINC000000067874	-7.9
ZINC000000091482	-7.9
ZINC000000121725	-7.9
ZINC000000121782	-7.9
ZINC000000123522	-7.9
ZINC000000128221	-7.9
ZINC000000128498	-7.9
ZINC000000128785	-7.9
ZINC000000138214	-7.9
ZINC000000172199	-7.9
ZINC000000172229	-7.9
ZINC000000176701	-7.9
ZINC000000182490	-7.9
ZINC000000188576	-7.9
ZINC000000193374	-7.9
ZINC000000206542	-7.9
ZINC000000210348	-7.9
ZINC000000213809	-7.9
ZINC000000225528	-7.9
ZINC000000284202	-7.9
ZINC000000289960	-7.9
ZINC000000302919	-7.9
ZINC000000319495	-7.9
ZINC000000349992	-7.9
ZINC000000355379	-7.9
ZINC000000362092	-7.9
ZINC000000409120	-7.9
ZINC000000410077	-7.9
ZINC000000443552	-7.9
ZINC000000445020	-7.9
ZINC000000467745	-7.9
ZINC000000517333	-7.9
ZINC000000709970	-7.9
ZINC000000780273	-7.9
ZINC000000792717	-7.9
ZINC000000799393	-7.9
ZINC000000834127	-7.9
ZINC000000849954	-7.9
ZINC000000859922	-7.9
ZINC000000994241	-7.9
ZINC000001005760	-7.9
ZINC000001025950	-7.9
ZINC000001057741	-7.9
ZINC000001083472	-7.9
ZINC000001507126	-7.9
ZINC000001774486	-7.9
ZINC000002075614	-7.9
ZINC000002156214	-7.9
ZINC000002159892	-7.9
ZINC000002181315	-7.9
ZINC000002261576	-7.9
ZINC000002325434	-7.9
ZINC000002436783	-7.9
ZINC000002481327	-7.9
ZINC000002864713	-7.9
ZINC000002870023	-7.9
ZINC000002901768	-7.9
ZINC000003025623	-7.9
ZINC000003041159	-7.9
ZINC000003059318	-7.9
ZINC000003127144	-7.9
ZINC000003908910	-7.9
ZINC000004036462	-7.9
ZINC000004112273	-7.9
ZINC000004113443	-7.9
ZINC000004118157	-7.9
ZINC000004178476	-7.9
ZINC000004268957	-7.9
ZINC000004340571	-7.9
[truncated: 1,094 more rows]

## Sheet: Suppl._Table_2
Supplementary table 2. Molecular docking-basead virtual screening of 3,092 natural products on the nucleotide-binding pocket of 3Q2J
Natural products	Vina score with 3Q2J
ZINC000000649629	-10.2
ZINC000031205183	-10.2
ZINC000000952700	-10.1
ZINC000031034672	-10.1
ZINC000054219980	-10
ZINC000014793040	-9.9
ZINC000031205304	-9.9
ZINC000062001304	-9.9
ZINC000065248687	-9.9
ZINC000000881318	-9.8
ZINC000002995638	-9.8
ZINC000010691968	-9.8
ZINC000015498603	-9.8
ZINC000015632981	-9.8
ZINC000062001380	-9.8
ZINC000062001410	-9.8
ZINC000072324929	-9.8
ZINC000000062430	-9.7
ZINC000000715403	-9.7
ZINC000003070964	-9.6
ZINC000010896238	-9.6
ZINC000016740609	-9.6
ZINC000032124479	-9.6
ZINC000040312888	-9.6
ZINC000056451756	-9.6
ZINC000000036029	-9.5
ZINC000000037387	-9.5
ZINC000000361920	-9.5
ZINC000000497416	-9.5
ZINC000001193126	-9.5
ZINC000002273547	-9.5
ZINC000004743727	-9.5
ZINC000008764432	-9.5
ZINC000008764696	-9.5
ZINC000012897137	-9.5
ZINC000024973004	-9.5
ZINC000032124125	-9.5
ZINC000036369806	-9.5
ZINC000036369849	-9.5
ZINC000065248829	-9.5
ZINC000096221940	-9.5
ZINC000253395576	-9.5
ZINC000000082459	-9.4
ZINC000000858419	-9.4
ZINC000004941192	-9.4
ZINC000006659873	-9.4
ZINC000007646291	-9.4
ZINC000008764985	-9.4
ZINC000011689965	-9.4
ZINC000022636588	-9.4
ZINC000032123832	-9.4
ZINC000032124206	-9.4
ZINC000062001396	-9.4
ZINC000062001856	-9.4
ZINC000065248835	-9.4
ZINC000070666610	-9.4
ZINC000072324966	-9.4
ZINC000170625415	-9.4
ZINC000000214590	-9.3
ZINC000001774452	-9.3
ZINC000002440299	-9.3
ZINC000004081983	-9.3
ZINC000004325593	-9.3
ZINC000005163649	-9.3
ZINC000006945929	-9.3
ZINC000009970585	-9.3
ZINC000011764554	-9.3
ZINC000013593433	-9.3
ZINC000015616332	-9.3
ZINC000015634041	-9.3
ZINC000017845496	-9.3
ZINC000018074512	-9.3
ZINC000020149715	-9.3
ZINC000032124196	-9.3
ZINC000072325780	-9.3
ZINC000116692853	-9.3
ZINC000000490460	-9.2
ZINC000000715423	-9.2
ZINC000000851402	-9.2
ZINC000001000138	-9.2
ZINC000001081655	-9.2
ZINC000001181775	-9.2
ZINC000001428710	-9.2
ZINC000002295637	-9.2
ZINC000004018828	-9.2
ZINC000004511289	-9.2
ZINC000005186286	-9.2
ZINC000008765057	-9.2
ZINC000010692217	-9.2
ZINC000012296920	-9.2
ZINC000017295598	-9.2
ZINC000017295613	-9.2
ZINC000017295740	-9.2
ZINC000017917305	-9.2
ZINC000018074516	-9.2
ZINC000018266194	-9.2
ZINC000020761909	-9.2
ZINC000032124400	-9.2
ZINC000033267221	-9.2
ZINC000038541161	-9.2
ZINC000040309212	-9.2
ZINC000040310053	-9.2
ZINC000062001517	-9.2
ZINC000065248714	-9.2
ZINC000065248827	-9.2
ZINC000079191935	-9.2
ZINC000079192767	-9.2
ZINC000000048259	-9.1
ZINC000000082960	-9.1
ZINC000000088393	-9.1
ZINC000000181783	-9.1
ZINC000000299218	-9.1
ZINC000000420319	-9.1
ZINC000000629674	-9.1
ZINC000000645771	-9.1
ZINC000000705352	-9.1
ZINC000000940122	-9.1
ZINC000000940123	-9.1
ZINC000000945277	-9.1
ZINC000000947829	-9.1
ZINC000001103131	-9.1
ZINC000001431982	-9.1
ZINC000001635386	-9.1
ZINC000002137292	-9.1
ZINC000004038781	-9.1
ZINC000004511287	-9.1
ZINC000004754367	-9.1
ZINC000005186283	-9.1
ZINC000005252569	-9.1
ZINC000005252582	-9.1
ZINC000005265775	-9.1
ZINC000006285205	-9.1
ZINC000006945956	-9.1
ZINC000006948145	-9.1
ZINC000007309056	-9.1
ZINC000008764270	-9.1
ZINC000008764377	-9.1
ZINC000008765013	-9.1
ZINC000009419002	-9.1
ZINC000010692210	-9.1
ZINC000011866009	-9.1
ZINC000012296791	-9.1
ZINC000012296832	-9.1
ZINC000012894938	-9.1
ZINC000012900631	-9.1
ZINC000013593437	-9.1
ZINC000017127731	-9.1
ZINC000020427691	-9.1
ZINC000020731356	-9.1
ZINC000023573165	-9.1
ZINC000027403539	-9.1
ZINC000032124344	-9.1
ZINC000040309443	-9.1
ZINC000040309725	-9.1
ZINC000040312660	-9.1
ZINC000062001419	-9.1
ZINC000062001634	-9.1
ZINC000065248715	-9.1
ZINC000065248812	-9.1
ZINC000072324441	-9.1
ZINC000075155689	-9.1
ZINC000075155690	-9.1
ZINC000096115530	-9.1
ZINC000096116500	-9.1
ZINC000253395575	-9.1
ZINC000263585734	-9.1
ZINC000000053390	-9
ZINC000000123440	-9
ZINC000000252937	-9
ZINC000001056072	-9
ZINC000001140989	-9
ZINC000001147793	-9
ZINC000002150596	-9
ZINC000002313470	-9
ZINC000002623960	-9
ZINC000004171960	-9
ZINC000004941191	-9
ZINC000005186281	-9
ZINC000007608804	-9
ZINC000007767413	-9
ZINC000008014217	-9
ZINC000010220492	-9
ZINC000011865977	-9
ZINC000012894375	-9
ZINC000015634188	-9
ZINC000020533805	-9
ZINC000020573540	-9
ZINC000020589218	-9
ZINC000022638023	-9
ZINC000023573167	-9
ZINC000036099418	-9
ZINC000036139388	-9
ZINC000038031717	-9
ZINC000040309014	-9
ZINC000040309997	-9
ZINC000040312544	-9
ZINC000054105911	-9
ZINC000062001299	-9
ZINC000065248739	-9
ZINC000070666235	-9
ZINC000072324946	-9
ZINC000085876604	-9
ZINC000170625752	-9
ZINC000000030231	-8.9
ZINC000000082732	-8.9
ZINC000000084773	-8.9
ZINC000000093725	-8.9
ZINC000000139406	-8.9
ZINC000000149852	-8.9
ZINC000000181785	-8.9
ZINC000000204260	-8.9
ZINC000000214503	-8.9
ZINC000000252942	-8.9
ZINC000000252947	-8.9
ZINC000000252950	-8.9
ZINC000000252954	-8.9
ZINC000000252965	-8.9
ZINC000000268624	-8.9
ZINC000000287773	-8.9
ZINC000000348815	-8.9
ZINC000000351988	-8.9
ZINC000000381091	-8.9
ZINC000000407802	-8.9
ZINC000000488963	-8.9
ZINC000000519805	-8.9
ZINC000000547223	-8.9
ZINC000000626132	-8.9
ZINC000000811628	-8.9
ZINC000001056531	-8.9
ZINC000002118094	-8.9
ZINC000002361668	-8.9
ZINC000002927518	-8.9
ZINC000003019221	-8.9
ZINC000003898361	-8.9
ZINC000004314925	-8.9
ZINC000004593481	-8.9
ZINC000005140634	-8.9
ZINC000005141342	-8.9
ZINC000005960258	-8.9
ZINC000006188551	-8.9
ZINC000006624119	-8.9
ZINC000006659844	-8.9
ZINC000006662507	-8.9
ZINC000006724557	-8.9
ZINC000007968746	-8.9
ZINC000008014216	-8.9
ZINC000008764227	-8.9
ZINC000008764386	-8.9
ZINC000008765056	-8.9
ZINC000008765505	-8.9
ZINC000009184550	-8.9
ZINC000009485381	-8.9
ZINC000010220491	-8.9
ZINC000011865976	-8.9
ZINC000012420464	-8.9
ZINC000012893479	-8.9
ZINC000012895139	-8.9
ZINC000012901074	-8.9
ZINC000013548665	-8.9
ZINC000018074517	-8.9
ZINC000019938173	-8.9
ZINC000020733688	-8.9
ZINC000021897756	-8.9
ZINC000027747024	-8.9
ZINC000036370093	-8.9
ZINC000049543708	-8.9
ZINC000056452021	-8.9
ZINC000062001586	-8.9
ZINC000062001786	-8.9
ZINC000064384165	-8.9
ZINC000065248686	-8.9
ZINC000070666334	-8.9
ZINC000070666358	-8.9
ZINC000072325745	-8.9
ZINC000085875089	-8.9
ZINC000085876933	-8.9
ZINC000085879798	-8.9
ZINC000096222528	-8.9
ZINC000181014801	-8.9
ZINC000000037946	-8.8
ZINC000000048966	-8.8
ZINC000000076861	-8.8
ZINC000000077982	-8.8
ZINC000000129487	-8.8
ZINC000000195406	-8.8
ZINC000000217204	-8.8
ZINC000000277750	-8.8
ZINC000000287767	-8.8
ZINC000000389336	-8.8
ZINC000000457519	-8.8
ZINC000000459362	-8.8
ZINC000000488054	-8.8
ZINC000000488975	-8.8
ZINC000000526252	-8.8
ZINC000000612125	-8.8
ZINC000000616244	-8.8
ZINC000000619505	-8.8
ZINC000000716751	-8.8
ZINC000000790601	-8.8
ZINC000000846624	-8.8
ZINC000000895394	-8.8
ZINC000000898145	-8.8
ZINC000000938341	-8.8
ZINC000000951037	-8.8
ZINC000001061009	-8.8
ZINC000001076065	-8.8
ZINC000001180854	-8.8
ZINC000001182734	-8.8
ZINC000001183226	-8.8
ZINC000002146465	-8.8
ZINC000002314305	-8.8
ZINC000002927579	-8.8
ZINC000003532863	-8.8
ZINC000003897007	-8.8
ZINC000004041116	-8.8
ZINC000004041573	-8.8
ZINC000004314036	-8.8
ZINC000004487684	-8.8
ZINC000004520329	-8.8
ZINC000004520331	-8.8
ZINC000004740491	-8.8
ZINC000004821129	-8.8
ZINC000005034246	-8.8
ZINC000005034266	-8.8
ZINC000005034278	-8.8
ZINC000005266402	-8.8
ZINC000005350310	-8.8
ZINC000005378510	-8.8
ZINC000005442715	-8.8
ZINC000005630934	-8.8
ZINC000007608976	-8.8
ZINC000007971486	-8.8
ZINC000008764381	-8.8
ZINC000008997481	-8.8
ZINC000009355767	-8.8
ZINC000009776582	-8.8
ZINC000011866008	-8.8
ZINC000011867273	-8.8
ZINC000012421821	-8.8
ZINC000012900838	-8.8
ZINC000015627354	-8.8
ZINC000015634187	-8.8
ZINC000015739216	-8.8
ZINC000015789798	-8.8
ZINC000020573515	-8.8
ZINC000021798708	-8.8
ZINC000022752975	-8.8
ZINC000032123824	-8.8
ZINC000036370094	-8.8
ZINC000040310251	-8.8
ZINC000040312939	-8.8
ZINC000040312963	-8.8
ZINC000040313037	-8.8
ZINC000040313090	-8.8
ZINC000054219982	-8.8
ZINC000062001300	-8.8
ZINC000064678933	-8.8
ZINC000065248705	-8.8
ZINC000065248813	-8.8
ZINC000070666586	-8.8
ZINC000072324644	-8.8
ZINC000072325588	-8.8
ZINC000079189191	-8.8
ZINC000079193450	-8.8
ZINC000100787891	-8.8
ZINC000000037947	-8.7
ZINC000000139047	-8.7
ZINC000000205891	-8.7
ZINC000000312499	-8.7
ZINC000000407129	-8.7
ZINC000000434079	-8.7
ZINC000000451617	-8.7
ZINC000000457424	-8.7
ZINC000000457518	-8.7
ZINC000000488867	-8.7
ZINC000000545897	-8.7
ZINC000000547821	-8.7
ZINC000000622396	-8.7
ZINC000000669599	-8.7
ZINC000000725545	-8.7
ZINC000000726166	-8.7
ZINC000000729798	-8.7
ZINC000000864974	-8.7
ZINC000000882730	-8.7
ZINC000000970801	-8.7
ZINC000001009415	-8.7
ZINC000001056920	-8.7
ZINC000001056954	-8.7
ZINC000001132058	-8.7
ZINC000001183363	-8.7
ZINC000002117097	-8.7
ZINC000002262654	-8.7
ZINC000002435963	-8.7
ZINC000002932920	-8.7
ZINC000003117428	-8.7
ZINC000003567049	-8.7
ZINC000003958696	-8.7
ZINC000004071072	-8.7
ZINC000004171961	-8.7
ZINC000004435433	-8.7
ZINC000004740496	-8.7
ZINC000004743640	-8.7
ZINC000005140805	-8.7
ZINC000005163698	-8.7
ZINC000005164114	-8.7
ZINC000005222143	-8.7
ZINC000005252578	-8.7
ZINC000005324266	-8.7
ZINC000005351131	-8.7
ZINC000005556278	-8.7
ZINC000006732687	-8.7
ZINC000006942858	-8.7
ZINC000008156839	-8.7
ZINC000008764460	-8.7
ZINC000008764808	-8.7
ZINC000008765014	-8.7
ZINC000008878835	-8.7
ZINC000009532155	-8.7
ZINC000009614689	-8.7
ZINC000011867272	-8.7
ZINC000012446800	-8.7
ZINC000013629969	-8.7
ZINC000013653561	-8.7
ZINC000013655690	-8.7
ZINC000014987932	-8.7
ZINC000015513464	-8.7
ZINC000015658352	-8.7
ZINC000016029211	-8.7
ZINC000016753968	-8.7
ZINC000019626257	-8.7
ZINC000019626261	-8.7
ZINC000019897823	-8.7
ZINC000021095374	-8.7
ZINC000027667834	-8.7
ZINC000032124460	-8.7
ZINC000040309308	-8.7
ZINC000040310009	-8.7
ZINC000040312473	-8.7
ZINC000040312825	-8.7
ZINC000062001855	-8.7
ZINC000064568301	-8.7
ZINC000065248826	-8.7
ZINC000070666646	-8.7
ZINC000070666648	-8.7
ZINC000072324908	-8.7
ZINC000072324968	-8.7
ZINC000072325058	-8.7
ZINC000072325084	-8.7
ZINC000072326144	-8.7
ZINC000082138166	-8.7
ZINC000095479167	-8.7
ZINC000096115529	-8.7
ZINC000096116164	-8.7
ZINC000000029950	-8.6
ZINC000000049564	-8.6
ZINC000000052258	-8.6
ZINC000000054796	-8.6
ZINC000000122544	-8.6
ZINC000000129480	-8.6
ZINC000000129483	-8.6
ZINC000000129501	-8.6
ZINC000000139058	-8.6
ZINC000000245322	-8.6
ZINC000000457454	-8.6
ZINC000000457522	-8.6
ZINC000000851756	-8.6
ZINC000000872110	-8.6
ZINC000000887157	-8.6
ZINC000000952697	-8.6
ZINC000001140988	-8.6
ZINC000001206269	-8.6
ZINC000002117358	-8.6
ZINC000002120006	-8.6
ZINC000002156096	-8.6
ZINC000002433715	-8.6
ZINC000002663838	-8.6
ZINC000002816522	-8.6
ZINC000002847132	-8.6
ZINC000002927517	-8.6
ZINC000002927662	-8.6
ZINC000003634344	-8.6
ZINC000003662054	-8.6
ZINC000004023882	-8.6
ZINC000004046033	-8.6
ZINC000004074101	-8.6
ZINC000004550514	-8.6
ZINC000004681690	-8.6
ZINC000004691218	-8.6
ZINC000004740494	-8.6
ZINC000005034242	-8.6
ZINC000005221630	-8.6
ZINC000005442713	-8.6
ZINC000006122773	-8.6
ZINC000006724282	-8.6
ZINC000006732688	-8.6
ZINC000006847728	-8.6
ZINC000007609872	-8.6
ZINC000007966947	-8.6
ZINC000008739329	-8.6
ZINC000008765244	-8.6
ZINC000008765456	-8.6
ZINC000008856458	-8.6
ZINC000008879403	-8.6
ZINC000009940895	-8.6
ZINC000011689966	-8.6
ZINC000012296790	-8.6
ZINC000012364222	-8.6
ZINC000012895520	-8.6
ZINC000015514750	-8.6
ZINC000016753972	-8.6
ZINC000017370419	-8.6
ZINC000019897822	-8.6
ZINC000020348995	-8.6
ZINC000020760935	-8.6
ZINC000026524149	-8.6
ZINC000027793184	-8.6
ZINC000031238808	-8.6
ZINC000032091280	-8.6
ZINC000032124207	-8.6
ZINC000036369810	-8.6
ZINC000036370067	-8.6
ZINC000036370107	-8.6
ZINC000040312427	-8.6
ZINC000049543307	-8.6
ZINC000055027966	-8.6
ZINC000062090016	-8.6
ZINC000065248704	-8.6
ZINC000065248738	-8.6
ZINC000065248889	-8.6
ZINC000070666286	-8.6
ZINC000070666621	-8.6
ZINC000072324730	-8.6
ZINC000072324913	-8.6
ZINC000096116521	-8.6
ZINC000101453177	-8.6
ZINC000170625487	-8.6
ZINC000217656476	-8.6
ZINC000000029911	-8.5
ZINC000000042341	-8.5
ZINC000000047236	-8.5
ZINC000000049207	-8.5
ZINC000000057384	-8.5
ZINC000000060717	-8.5
ZINC000000085850	-8.5
ZINC000000091600	-8.5
ZINC000000117155	-8.5
ZINC000000189406	-8.5
ZINC000000200921	-8.5
ZINC000000204257	-8.5
ZINC000000288369	-8.5
ZINC000000308309	-8.5
ZINC000000319130	-8.5
ZINC000000340372	-8.5
ZINC000000567111	-8.5
ZINC000000633911	-8.5
ZINC000000646122	-8.5
ZINC000000663198	-8.5
ZINC000000674221	-8.5
ZINC000000727753	-8.5
ZINC000000790595	-8.5
ZINC000000811627	-8.5
ZINC000000818841	-8.5
ZINC000000846556	-8.5
ZINC000000846863	-8.5
ZINC000000851783	-8.5
ZINC000000946440	-8.5
ZINC000000947828	-8.5
ZINC000000952696	-8.5
ZINC000000985309	-8.5
ZINC000001043658	-8.5
ZINC000001156352	-8.5
ZINC000001216272	-8.5
ZINC000001388104	-8.5
ZINC000001774455	-8.5
ZINC000001812712	-8.5
ZINC000002205059	-8.5
ZINC000002219622	-8.5
ZINC000002241474	-8.5
ZINC000002739191	-8.5
ZINC000002927523	-8.5
ZINC000003020051	-8.5
ZINC000003038242	-8.5
ZINC000003087481	-8.5
ZINC000003117429	-8.5
ZINC000003532866	-8.5
ZINC000003598909	-8.5
ZINC000003833919	-8.5
ZINC000004028582	-8.5
ZINC000004084926	-8.5
ZINC000004185236	-8.5
ZINC000004538911	-8.5
ZINC000004722167	-8.5
ZINC000004743662	-8.5
ZINC000005163220	-8.5
ZINC000005221405	-8.5
ZINC000005346547	-8.5
ZINC000006421318	-8.5
ZINC000006658756	-8.5
ZINC000006658757	-8.5
ZINC000006727258	-8.5
ZINC000006751924	-8.5
ZINC000006756093	-8.5
ZINC000006760504	-8.5
ZINC000007770866	-8.5
ZINC000008764953	-8.5
ZINC000008782368	-8.5
ZINC000008916953	-8.5
ZINC000008917212	-8.5
ZINC000009184292	-8.5
ZINC000009418760	-8.5
ZINC000012371690	-8.5
ZINC000012377443	-8.5
ZINC000012896067	-8.5
ZINC000012899768	-8.5
ZINC000012901690	-8.5
ZINC000012902904	-8.5
ZINC000013625485	-8.5
ZINC000013688865	-8.5
ZINC000014890901	-8.5
ZINC000016985258	-8.5
ZINC000020436649	-8.5
ZINC000020623794	-8.5
ZINC000022468380	-8.5
ZINC000023973405	-8.5
ZINC000027793187	-8.5
ZINC000031034621	-8.5
ZINC000031948984	-8.5
ZINC000035802400	-8.5
ZINC000036370010	-8.5
ZINC000036370039	-8.5
ZINC000036370049	-8.5
ZINC000040310012	-8.5
ZINC000040310308	-8.5
ZINC000040313049	-8.5
ZINC000040313052	-8.5
ZINC000062001309	-8.5
ZINC000062001579	-8.5
ZINC000062001785	-8.5
ZINC000064818409	-8.5
ZINC000065248828	-8.5
ZINC000070666561	-8.5
ZINC000072324874	-8.5
ZINC000072325869	-8.5
ZINC000072326175	-8.5
ZINC000079189063	-8.5
ZINC000079189544	-8.5
ZINC000085879182	-8.5
ZINC000217836748	-8.5
ZINC000000037225	-8.4
ZINC000000075050	-8.4
ZINC000000075055	-8.4
ZINC000000086306	-8.4
ZINC000000093238	-8.4
ZINC000000100039	-8.4
ZINC000000101628	-8.4
ZINC000000121773	-8.4
ZINC000000200919	-8.4
ZINC000000252998	-8.4
ZINC000000263543	-8.4
ZINC000000301757	-8.4
ZINC000000307989	-8.4
ZINC000000319500	-8.4
ZINC000000451439	-8.4
ZINC000000464051	-8.4
ZINC000000466323	-8.4
ZINC000000485974	-8.4
ZINC000000488868	-8.4
ZINC000000490459	-8.4
ZINC000000636759	-8.4
ZINC000000662309	-8.4
ZINC000000797604	-8.4
ZINC000000851781	-8.4
ZINC000000872106	-8.4
ZINC000000940064	-8.4
ZINC000001033116	-8.4
ZINC000001164955	-8.4
ZINC000001177436	-8.4
ZINC000001431477	-8.4
ZINC000001459962	-8.4
ZINC000001593750	-8.4
ZINC000001782109	-8.4
ZINC000001782741	-8.4
ZINC000002125110	-8.4
ZINC000002125178	-8.4
ZINC000002130508	-8.4
ZINC000002213629	-8.4
ZINC000002811830	-8.4
ZINC000003645863	-8.4
ZINC000003984924	-8.4
ZINC000004089132	-8.4
ZINC000004327979	-8.4
ZINC000004487694	-8.4
ZINC000004857359	-8.4
ZINC000004933096	-8.4
ZINC000005184209	-8.4
ZINC000005960296	-8.4
ZINC000006624197	-8.4
ZINC000006659874	-8.4
ZINC000006719077	-8.4
ZINC000006759854	-8.4
ZINC000006875695	-8.4
ZINC000006947229	-8.4
ZINC000008331791	-8.4
ZINC000008764734	-8.4
ZINC000008843813	-8.4
ZINC000008916954	-8.4
ZINC000008917443	-8.4
ZINC000009486197	-8.4
ZINC000010434758	-8.4
ZINC000010434760	-8.4
ZINC000011535882	-8.4
ZINC000011865129	-8.4
ZINC000012296515	-8.4
ZINC000012296847	-8.4
ZINC000012296849	-8.4
ZINC000012895456	-8.4
ZINC000012900626	-8.4
ZINC000012902395	-8.4
ZINC000013534584	-8.4
ZINC000013572042	-8.4
ZINC000015511641	-8.4
ZINC000016753970	-8.4
ZINC000016985268	-8.4
ZINC000017911588	-8.4
ZINC000017911589	-8.4
ZINC000018074513	-8.4
ZINC000019606453	-8.4
ZINC000019897818	-8.4
ZINC000019897819	-8.4
ZINC000019897920	-8.4
ZINC000020193380	-8.4
ZINC000020762756	-8.4
ZINC000023973569	-8.4
ZINC000027747016	-8.4
ZINC000031840679	-8.4
ZINC000032124189	-8.4
ZINC000032540773	-8.4
ZINC000033171326	-8.4
ZINC000034651227	-8.4
ZINC000035376326	-8.4
ZINC000036369859	-8.4
ZINC000040309335	-8.4
ZINC000040309767	-8.4
ZINC000040310270	-8.4
ZINC000040313312	-8.4
ZINC000041146470	-8.4
ZINC000056452763	-8.4
ZINC000062001442	-8.4
ZINC000063829210	-8.4
ZINC000065248721	-8.4
ZINC000065248834	-8.4
ZINC000072324467	-8.4
ZINC000079190538	-8.4
ZINC000079196745	-8.4
ZINC000085879196	-8.4
ZINC000095348656	-8.4
ZINC000096114513	-8.4
ZINC000096116085	-8.4
ZINC000100305206	-8.4
ZINC000217666784	-8.4
ZINC000000029936	-8.3
ZINC000000036322	-8.3
ZINC000000043178	-8.3
ZINC000000051478	-8.3
ZINC000000104829	-8.3
ZINC000000117941	-8.3
ZINC000000121705	-8.3
ZINC000000128748	-8.3
ZINC000000176670	-8.3
ZINC000000183254	-8.3
ZINC000000188482	-8.3
ZINC000000224861	-8.3
ZINC000000246205	-8.3
ZINC000000253439	-8.3
ZINC000000257787	-8.3
ZINC000000265220	-8.3
ZINC000000265221	-8.3
ZINC000000270124	-8.3
ZINC000000290995	-8.3
ZINC000000303350	-8.3
ZINC000000308124	-8.3
ZINC000000388180	-8.3
ZINC000000455859	-8.3
ZINC000000528975	-8.3
ZINC000000634162	-8.3
ZINC000000674222	-8.3
ZINC000000790589	-8.3
ZINC000000811636	-8.3
ZINC000000834044	-8.3
ZINC000000839113	-8.3
ZINC000000846901	-8.3
ZINC000000851762	-8.3
ZINC000000872109	-8.3
ZINC000000881320	-8.3
ZINC000000940124	-8.3
ZINC000000978484	-8.3
ZINC000001043659	-8.3
ZINC000001115949	-8.3
ZINC000001801245	-8.3
ZINC000002097966	-8.3
ZINC000002120125	-8.3
ZINC000002147553	-8.3
ZINC000002261576	-8.3
ZINC000002332533	-8.3
ZINC000002350392	-8.3
ZINC000002442605	-8.3
ZINC000002708392	-8.3
ZINC000003048761	-8.3
ZINC000003881190	-8.3
ZINC000004084925	-8.3
ZINC000004151766	-8.3
ZINC000004472972	-8.3
ZINC000004487678	-8.3
ZINC000004487679	-8.3
ZINC000004487680	-8.3
ZINC000004731619	-8.3
ZINC000004743653	-8.3
ZINC000004821016	-8.3
ZINC000005345416	-8.3
ZINC000006228377	-8.3
ZINC000006700718	-8.3
ZINC000006727259	-8.3
ZINC000006755479	-8.3
ZINC000006756098	-8.3
ZINC000006810057	-8.3
ZINC000006917892	-8.3
ZINC000007006309	-8.3
ZINC000007941110	-8.3
ZINC000008115511	-8.3
ZINC000008135953	-8.3
ZINC000008276825	-8.3
ZINC000008287180	-8.3
ZINC000008764462	-8.3
ZINC000010691961	-8.3
ZINC000012894021	-8.3
ZINC000012901525	-8.3
ZINC000013655372	-8.3
ZINC000013682180	-8.3
ZINC000015511559	-8.3
ZINC000015721882	-8.3
ZINC000015867426	-8.3
ZINC000016849161	-8.3
ZINC000016850754	-8.3
ZINC000019720165	-8.3
ZINC000019720612	-8.3
ZINC000020745248	-8.3
ZINC000021911910	-8.3
ZINC000022766651	-8.3
ZINC000027667710	-8.3
ZINC000030654091	-8.3
ZINC000031035270	-8.3
ZINC000031239902	-8.3
ZINC000032123999	-8.3
ZINC000032124408	-8.3
ZINC000034717612	-8.3
ZINC000035514688	-8.3
ZINC000036369940	-8.3
ZINC000036369966	-8.3
ZINC000038746550	-8.3
ZINC000040309469	-8.3
ZINC000040310026	-8.3
ZINC000040313055	-8.3
ZINC000040313185	-8.3
ZINC000041127953	-8.3
ZINC000041428388	-8.3
ZINC000045130783	-8.3
ZINC000048375995	-8.3
ZINC000049513423	-8.3
ZINC000054105913	-8.3
ZINC000055044019	-8.3
ZINC000057268629	-8.3
ZINC000062001350	-8.3
ZINC000063829072	-8.3
ZINC000064568304	-8.3
ZINC000065248701	-8.3
ZINC000065248707	-8.3
ZINC000065248723	-8.3
ZINC000065248888	-8.3
ZINC000070666459	-8.3
ZINC000070666507	-8.3
ZINC000072324668	-8.3
ZINC000072324739	-8.3
ZINC000072325291	-8.3
ZINC000085877063	-8.3
ZINC000085877114	-8.3
ZINC000096115712	-8.3
ZINC000096221891	-8.3
ZINC000096222341	-8.3
ZINC000096834554	-8.3
ZINC000191005053	-8.3
ZINC000253401654	-8.3
ZINC000000037219	-8.2
ZINC000000049465	-8.2
ZINC000000084013	-8.2
ZINC000000084016	-8.2
ZINC000000085855	-8.2
ZINC000000101633	-8.2
ZINC000000139296	-8.2
ZINC000000167142	-8.2
ZINC000000168970	-8.2
ZINC000000183749	-8.2
ZINC000000183903	-8.2
ZINC000000188569	-8.2
ZINC000000193375	-8.2
ZINC000000253114	-8.2
ZINC000000265224	-8.2
ZINC000000288797	-8.2
ZINC000000289917	-8.2
ZINC000000314646	-8.2
ZINC000000318757	-8.2
ZINC000000434716	-8.2
ZINC000000465410	-8.2
ZINC000000465698	-8.2
ZINC000000465744	-8.2
ZINC000000487469	-8.2
ZINC000000489352	-8.2
ZINC000000489425	-8.2
ZINC000000526112	-8.2
ZINC000000526619	-8.2
ZINC000000526760	-8.2
ZINC000000535116	-8.2
ZINC000000634165	-8.2
ZINC000000645768	-8.2
ZINC000000779530	-8.2
ZINC000000862857	-8.2
ZINC000000953723	-8.2
ZINC000000980824	-8.2
ZINC000000995046	-8.2
ZINC000000996226	-8.2
ZINC000001061006	-8.2
ZINC000001414401	-8.2
ZINC000001730671	-8.2
ZINC000001812713	-8.2
ZINC000001848107	-8.2
ZINC000002112713	-8.2
ZINC000002130040	-8.2
ZINC000002340369	-8.2
ZINC000002481327	-8.2
ZINC000002851302	-8.2
ZINC000002882062	-8.2
ZINC000002910112	-8.2
ZINC000002954356	-8.2
ZINC000003567051	-8.2
ZINC000004112271	-8.2
ZINC000004342713	-8.2
ZINC000004563192	-8.2
ZINC000004580100	-8.2
ZINC000004687314	-8.2
ZINC000004743677	-8.2
ZINC000004933305	-8.2
ZINC000005163216	-8.2
ZINC000005163218	-8.2
ZINC000005221403	-8.2
ZINC000005388414	-8.2
ZINC000006661189	-8.2
ZINC000006702896	-8.2
ZINC000006767783	-8.2
ZINC000008490995	-8.2
ZINC000008490996	-8.2
ZINC000008613760	-8.2
ZINC000008613762	-8.2
ZINC000008869947	-8.2
ZINC000008879751	-8.2
ZINC000008990766	-8.2
ZINC000009420622	-8.2
ZINC000009776583	-8.2
ZINC000009776584	-8.2
ZINC000010146618	-8.2
ZINC000012063019	-8.2
ZINC000012063020	-8.2
ZINC000012458366	-8.2
ZINC000012893432	-8.2
ZINC000012898325	-8.2
ZINC000014153647	-8.2
ZINC000014891020	-8.2
ZINC000015423506	-8.2
ZINC000015511616	-8.2
ZINC000016626252	-8.2
ZINC000016645732	-8.2
ZINC000016753975	-8.2
ZINC000016850764	-8.2
ZINC000019720438	-8.2
ZINC000019897829	-8.2
ZINC000019897832	-8.2
ZINC000019897919	-8.2
ZINC000019902227	-8.2
ZINC000020412466	-8.2
ZINC000020427677	-8.2
ZINC000020547507	-8.2
ZINC000020763527	-8.2
ZINC000021095335	-8.2
ZINC000022609257	-8.2
ZINC000023142687	-8.2
ZINC000027581507	-8.2
ZINC000027749433	-8.2
ZINC000027793096	-8.2
ZINC000031035874	-8.2
ZINC000032123933	-8.2
ZINC000032123936	-8.2
ZINC000032124252	-8.2
ZINC000032124340	-8.2
ZINC000032124518	-8.2
ZINC000032200440	-8.2
ZINC000035485065	-8.2
ZINC000035485066	-8.2
ZINC000040309072	-8.2
ZINC000041146472	-8.2
ZINC000042025246	-8.2
ZINC000056452804	-8.2
ZINC000064677353	-8.2
ZINC000065248684	-8.2
ZINC000065248685	-8.2
ZINC000070666344	-8.2
ZINC000070666405	-8.2
ZINC000070666587	-8.2
ZINC000079191880	-8.2
ZINC000082138167	-8.2
ZINC000085875067	-8.2
ZINC000096221803	-8.2
ZINC000100447609	-8.2
ZINC000000030012	-8.1
ZINC000000030015	-8.1
ZINC000000030016	-8.1
ZINC000000036558	-8.1
ZINC000000047682	-8.1
ZINC000000051236	-8.1
ZINC000000057595	-8.1
ZINC000000064870	-8.1
ZINC000000073848	-8.1
ZINC000000077536	-8.1
ZINC000000104210	-8.1
ZINC000000104215	-8.1
ZINC000000121711	-8.1
ZINC000000123522	-8.1
ZINC000000127857	-8.1
ZINC000000128782	-8.1
ZINC000000139294	-8.1
ZINC000000151327	-8.1
ZINC000000168652	-8.1
ZINC000000175292	-8.1
ZINC000000185010	-8.1
ZINC000000187413	-8.1
ZINC000000202241	-8.1
ZINC000000226663	-8.1
ZINC000000235875	-8.1
ZINC000000258922	-8.1
ZINC000000271688	-8.1
ZINC000000272845	-8.1
ZINC000000287711	-8.1
ZINC000000294730	-8.1
ZINC000000303763	-8.1
ZINC000000349992	-8.1
ZINC000000362940	-8.1
ZINC000000429239	-8.1
ZINC000000433184	-8.1
ZINC000000445020	-8.1
ZINC000000486262	-8.1
ZINC000000489005	-8.1
ZINC000000517333	-8.1
ZINC000000528977	-8.1
ZINC000000626134	-8.1
ZINC000000626395	-8.1
ZINC000000626450	-8.1
ZINC000000626451	-8.1
ZINC000000626906	-8.1
ZINC000000709970	-8.1
ZINC000000718336	-8.1
ZINC000000727754	-8.1
ZINC000000782969	-8.1
ZINC000000784164	-8.1
ZINC000000790598	-8.1
ZINC000000796549	-8.1
ZINC000000797605	-8.1
ZINC000000851775	-8.1
ZINC000000851782	-8.1
ZINC000000851800	-8.1
ZINC000000851801	-8.1
ZINC000000852673	-8.1
ZINC000000970804	-8.1
ZINC000000973911	-8.1
ZINC000000978483	-8.1
ZINC000001076066	-8.1
ZINC000001137359	-8.1
ZINC000001140301	-8.1
ZINC000001177649	-8.1
ZINC000001230614	-8.1
ZINC000001770388	-8.1
ZINC000001831688	-8.1
ZINC000002149921	-8.1
ZINC000002181315	-8.1
ZINC000002479361	-8.1
ZINC000002864603	-8.1
ZINC000002874610	-8.1
ZINC000002927573	-8.1
ZINC000002927642	-8.1
ZINC000002960168	-8.1
ZINC000003598836	-8.1
ZINC000004000394	-8.1
ZINC000004036462	-8.1
ZINC000004056187	-8.1
ZINC000004121118	-8.1
ZINC000004162883	-8.1
ZINC000004487666	-8.1
ZINC000004487700	-8.1
ZINC000004539378	-8.1
ZINC000004590889	-8.1
ZINC000004731617	-8.1
ZINC000004743330	-8.1
ZINC000004743646	-8.1
ZINC000005184167	-8.1
ZINC000005203961	-8.1
ZINC000006170743	-8.1
ZINC000006623988	-8.1
ZINC000006624204	-8.1
ZINC000006660179	-8.1
ZINC000006661639	-8.1
ZINC000006670403	-8.1
ZINC000006677896	-8.1
ZINC000006719986	-8.1
ZINC000006750389	-8.1
ZINC000006917925	-8.1
ZINC000006942805	-8.1
ZINC000006942860	-8.1
ZINC000006945838	-8.1
ZINC000006947183	-8.1
ZINC000007005316	-8.1
ZINC000008764721	-8.1
ZINC000008764993	-8.1
ZINC000008765339	-8.1
ZINC000008783043	-8.1
ZINC000008869946	-8.1
ZINC000008916957	-8.1
ZINC000009095535	-8.1
ZINC000009095536	-8.1
ZINC000009135062	-8.1
ZINC000010272773	-8.1
ZINC000011865133	-8.1
ZINC000011865975	-8.1
ZINC000012062834	-8.1
ZINC000012248578	-8.1
ZINC000012390160	-8.1
ZINC000012895299	-8.1
ZINC000012897764	-8.1
ZINC000013570997	-8.1
ZINC000017064889	-8.1
ZINC000017911463	-8.1
ZINC000017911472	-8.1
ZINC000018157712	-8.1
ZINC000019804924	-8.1
ZINC000019897817	-8.1
ZINC000020427682	-8.1
ZINC000020745249	-8.1
ZINC000020762090	-8.1
ZINC000020889869	-8.1
ZINC000021114899	-8.1
ZINC000021168734	-8.1
ZINC000021175073	-8.1
ZINC000021798703	-8.1
ZINC000027662042	-8.1
ZINC000027667725	-8.1
ZINC000027667836	-8.1
ZINC000027749442	-8.1
ZINC000034689318	-8.1
ZINC000035363889	-8.1
ZINC000035514690	-8.1
ZINC000036370048	-8.1
ZINC000040310314	-8.1
ZINC000055253349	-8.1
ZINC000062001349	-8.1
ZINC000062001514	-8.1
ZINC000062001515	-8.1
ZINC000064677375	-8.1
ZINC000065248698	-8.1
ZINC000065248699	-8.1
ZINC000065248724	-8.1
ZINC000072324736	-8.1
ZINC000072325190	-8.1
ZINC000072325608	-8.1
ZINC000075550723	-8.1
ZINC000096114044	-8.1
ZINC000096116098	-8.1
ZINC000100793085	-8.1
ZINC000141733092	-8.1
ZINC000217689178	-8.1
ZINC000000030032	-8
ZINC000000030164	-8
ZINC000000030553	-8
ZINC000000037033	-8
ZINC000000037324	-8
ZINC000000037926	-8
ZINC000000042677	-8
ZINC000000047229	-8
ZINC000000051062	-8
ZINC000000051235	-8
ZINC000000058774	-8
ZINC000000058775	-8
ZINC000000063712	-8
ZINC000000087123	-8
ZINC000000101578	-8
ZINC000000128522	-8
ZINC000000129499	-8
ZINC000000172199	-8
ZINC000000186351	-8
ZINC000000188576	-8
ZINC000000206445	-8
ZINC000000210701	-8
ZINC000000212487	-8
ZINC000000225001	-8
ZINC000000258573	-8
ZINC000000258917	-8
ZINC000000263629	-8
ZINC000000268344	-8
ZINC000000288337	-8
ZINC000000302919	-8
ZINC000000303635	-8
ZINC000000339819	-8
ZINC000000457423	-8
ZINC000000487729	-8
ZINC000000626078	-8
ZINC000000645844	-8
ZINC000000671043	-8
ZINC000000779527	-8
ZINC000000779539	-8
ZINC000000789521	-8
ZINC000000800005	-8
ZINC000000815175	-8
ZINC000000834127	-8
ZINC000000860277	-8
ZINC000000870600	-8
ZINC000000900119	-8
ZINC000000940063	-8
ZINC000000942058	-8
ZINC000001056074	-8
ZINC000001067102	-8
ZINC000001134403	-8
ZINC000001156429	-8
ZINC000001230512	-8
ZINC000001253313	-8
ZINC000001383820	-8
ZINC000001459963	-8
ZINC000001851949	-8
ZINC000002111109	-8
ZINC000002225665	-8
ZINC000002325434	-8
ZINC000002380283	-8
ZINC000002780061	-8
ZINC000002927553	-8
ZINC000003033906	-8
ZINC000003045433	-8
ZINC000003493707	-8
ZINC000003598839	-8
ZINC000003623313	-8
ZINC000003908306	-8
ZINC000004000290	-8
ZINC000004023847	-8
ZINC000004062163	-8
ZINC000004090436	-8
ZINC000004409957	-8
ZINC000004661567	-8
ZINC000004671965	-8
ZINC000004673412	-8
ZINC000004673507	-8
ZINC000004814474	-8
ZINC000004834423	-8
ZINC000004881007	-8
ZINC000004933099	-8
ZINC000005177425	-8
ZINC000005179869	-8
ZINC000005347406	-8
ZINC000005347408	-8
ZINC000005395036	-8
ZINC000005960278	-8
ZINC000006428244	-8
ZINC000006623933	-8
ZINC000006659337	-8
ZINC000006728901	-8
ZINC000006736815	-8
ZINC000006736835	-8
ZINC000006760322	-8
ZINC000006947000	-8
ZINC000006947087	-8
ZINC000008764735	-8
ZINC000008765016	-8
ZINC000008765080	-8
ZINC000008765243	-8
ZINC000008765338	-8
ZINC000008879755	-8
ZINC000008916786	-8
ZINC000008917445	-8
ZINC000009224897	-8
ZINC000009379650	-8
ZINC000012062833	-8
ZINC000012296516	-8
ZINC000012895461	-8
ZINC000015721861	-8
ZINC000015721863	-8
ZINC000016192612	-8
ZINC000016469236	-8
ZINC000017911462	-8
ZINC000018142900	-8
ZINC000018203176	-8
ZINC000019872542	-8
ZINC000019902252	-8
ZINC000020761444	-8
ZINC000020762095	-8
ZINC000021911914	-8
ZINC000021911941	-8
ZINC000023973566	-8
ZINC000027581500	-8
ZINC000027667629	-8
ZINC000027667712	-8
ZINC000027667724	-8
ZINC000031437095	-8
ZINC000032124098	-8
ZINC000032124524	-8
ZINC000032491914	-8
ZINC000033422042	-8
ZINC000034191060	-8
ZINC000034786191	-8
ZINC000040309010	-8
ZINC000040309154	-8
ZINC000040312569	-8
ZINC000041296414	-8
ZINC000045293480	-8
ZINC000048935555	-8
ZINC000055441332	-8
ZINC000056452037	-8
ZINC000057419423	-8
ZINC000060349748	-8
ZINC000062005039	-8
ZINC000064568272	-8
ZINC000064818391	-8
ZINC000065248720	-8
ZINC000070666404	-8
ZINC000072324910	-8
ZINC000072325188	-8
ZINC000075437297	-8
ZINC000075437336	-8
ZINC000079188768	-8
ZINC000096114257	-8
ZINC000096222339	-8
ZINC000218085683	-8
ZINC000253414997	-8
ZINC000000029645	-7.9
ZINC000000036046	-7.9
ZINC000000041471	-7.9
ZINC000000043912	-7.9
ZINC000000044431	-7.9
ZINC000000052126	-7.9
ZINC000000053904	-7.9
ZINC000000057912	-7.9
ZINC000000060228	-7.9
ZINC000000062333	-7.9
ZINC000000069962	-7.9
ZINC000000075063	-7.9
ZINC000000077299	-7.9
ZINC000000077860	-7.9
ZINC000000117038	-7.9
ZINC000000117162	-7.9
ZINC000000128498	-7.9
ZINC000000139291	-7.9
ZINC000000167151	-7.9
ZINC000000170614	-7.9
ZINC000000184586	-7.9
ZINC000000184993	-7.9
ZINC000000194222	-7.9
ZINC000000203256	-7.9
ZINC000000237754	-7.9
ZINC000000239904	-7.9
ZINC000000243741	-7.9
ZINC000000260264	-7.9
ZINC000000263653	-7.9
ZINC000000263687	-7.9
ZINC000000285367	-7.9
ZINC000000289960	-7.9
ZINC000000394916	-7.9
ZINC000000433183	-7.9
ZINC000000477778	-7.9
ZINC000000534027	-7.9
ZINC000000640096	-7.9
ZINC000000643416	-7.9
ZINC000000677522	-7.9
ZINC000000774899	-7.9
ZINC000000778542	-7.9
ZINC000000780272	-7.9
ZINC000000780273	-7.9
ZINC000000790591	-7.9
ZINC000000790603	-7.9
ZINC000000798517	-7.9
ZINC000000813617	-7.9
ZINC000000818842	-7.9
ZINC000000824756	-7.9
ZINC000000851757	-7.9
ZINC000000851758	-7.9
ZINC000000851780	-7.9
ZINC000000851790	-7.9
ZINC000000851803	-7.9
ZINC000000859108	-7.9
ZINC000000860140	-7.9
ZINC000000872105	-7.9
ZINC000001025950	-7.9
ZINC000001049568	-7.9
ZINC000001189611	-7.9
ZINC000001326078	-7.9
ZINC000001428654	-7.9
ZINC000001770383	-7.9
ZINC000001776401	-7.9
ZINC000001831994	-7.9
ZINC000001857016	-7.9
ZINC000002111107	-7.9
ZINC000002219639	-7.9
ZINC000002380264	-7.9
ZINC000002430871	-7.9
ZINC000002432176	-7.9
ZINC000002494787	-7.9
ZINC000002610313	-7.9
ZINC000002743379	-7.9
ZINC000002760562	-7.9
ZINC000002774536	-7.9
ZINC000002780062	-7.9
ZINC000002864579	-7.9
ZINC000002864695	-7.9
ZINC000002864762	-7.9
ZINC000002927593	-7.9
ZINC000002954357	-7.9
ZINC000003029286	-7.9
ZINC000003089782	-7.9
ZINC000003832542	-7.9
ZINC000003905502	-7.9
ZINC000004042308	-7.9
ZINC000004112273	-7.9
ZINC000004342707	-7.9
ZINC000004353955	-7.9
ZINC000004409962	-7.9
ZINC000004487683	-7.9
ZINC000004680889	-7.9
ZINC000004710851	-7.9
ZINC000004740655	-7.9
ZINC000004826940	-7.9
ZINC000004880450	-7.9
ZINC000004880505	-7.9
ZINC000004933309	-7.9
ZINC000005157014	-7.9
ZINC000005157016	-7.9
ZINC000005304982	-7.9
ZINC000005307695	-7.9
ZINC000005347522	-7.9
ZINC000006659778	-7.9
ZINC000006668550	-7.9
ZINC000006736847	-7.9
ZINC000006766255	-7.9
ZINC000006767084	-7.9
ZINC000006767483	-7.9
ZINC000006917884	-7.9
ZINC000006917970	-7.9
ZINC000006947018	-7.9
ZINC000006947032	-7.9
ZINC000006947046	-7.9
ZINC000007000021	-7.9
ZINC000008487863	-7.9
ZINC000008666593	-7.9
ZINC000008764452	-7.9
ZINC000008764771	-7.9
ZINC000008764821	-7.9
ZINC000008764927	-7.9
ZINC000008764971	-7.9
ZINC000008765042	-7.9
ZINC000008765081	-7.9
ZINC000008916787	-7.9
ZINC000008917213	-7.9
ZINC000008917446	-7.9
ZINC000009085200	-7.9
ZINC000009419283	-7.9
ZINC000011916604	-7.9
ZINC000012296848	-7.9
ZINC000012662276	-7.9
ZINC000012896637	-7.9
ZINC000012896650	-7.9
ZINC000013722995	-7.9
ZINC000015721630	-7.9
ZINC000015721829	-7.9
ZINC000015721884	-7.9
ZINC000015721906	-7.9
ZINC000016705926	-7.9
ZINC000016850779	-7.9
ZINC000017845831	-7.9
ZINC000017911473	-7.9
ZINC000017911474	-7.9
ZINC000019565317	-7.9
ZINC000019902228	-7.9
ZINC000020394211	-7.9
ZINC000020412441	-7.9
ZINC000020610098	-7.9
ZINC000020622823	-7.9
ZINC000020761521	-7.9
ZINC000020761915	-7.9
ZINC000020889873	-7.9
ZINC000021095319	-7.9
ZINC000021911945	-7.9
ZINC000022468127	-7.9
ZINC000023142442	-7.9
ZINC000023973401	-7.9
ZINC000027662187	-7.9
ZINC000027664000	-7.9
ZINC000027794412	-7.9
ZINC000027794415	-7.9
ZINC000028288167	-7.9
ZINC000032124320	-7.9
ZINC000036369988	-7.9
ZINC000036611944	-7.9
ZINC000040309257	-7.9
ZINC000041146468	-7.9
ZINC000044652242	-7.9
ZINC000049409974	-7.9
ZINC000049679127	-7.9
ZINC000054297640	-7.9
ZINC000057419387	-7.9
ZINC000062001589	-7.9
ZINC000065248700	-7.9
ZINC000065248706	-7.9
ZINC000065248725	-7.9
ZINC000070666562	-7.9
ZINC000072324853	-7.9
ZINC000072326105	-7.9
ZINC000074715541	-7.9
ZINC000075437380	-7.9
ZINC000079190036	-7.9
ZINC000079191217	-7.9
ZINC000085879434	-7.9
ZINC000095473130	-7.9
ZINC000096113786	-7.9
ZINC000096115940	-7.9
ZINC000096222257	-7.9
ZINC000100319831	-7.9
ZINC000181011508	-7.9
ZINC000000030311	-7.8
ZINC000000030555	-7.8
ZINC000000036021	-7.8
ZINC000000070278	-7.8
ZINC000000073789	-7.8
ZINC000000077337	-7.8
ZINC000000082495	-7.8
ZINC000000121782	-7.8
ZINC000000128785	-7.8
ZINC000000133071	-7.8
ZINC000000149855	-7.8
ZINC000000168547	-7.8
ZINC000000193374	-7.8
ZINC000000199656	-7.8
ZINC000000200703	-7.8
ZINC000000200908	-7.8
ZINC000000212473	-7.8
ZINC000000253015	-7.8
ZINC000000273797	-7.8
ZINC000000274151	-7.8
ZINC000000284202	-7.8
ZINC000000288906	-7.8
ZINC000000288908	-7.8
ZINC000000303500	-7.8
ZINC000000303757	-7.8
ZINC000000318791	-7.8
ZINC000000422917	-7.8
ZINC000000430322	-7.8
ZINC000000434185	-7.8
ZINC000000437169	-7.8
ZINC000000443952	-7.8
ZINC000000456872	-7.8
ZINC000000464304	-7.8
ZINC000000519080	-7.8
ZINC000000620044	-7.8
ZINC000000641902	-7.8
ZINC000000645767	-7.8
ZINC000000799393	-7.8
ZINC000000869721	-7.8
ZINC000000898099	-7.8
ZINC000000970802	-7.8
ZINC000000985047	-7.8
ZINC000001005760	-7.8
ZINC000001005762	-7.8
ZINC000001061484	-7.8
ZINC000001079435	-7.8
ZINC000001080160	-7.8
ZINC000001130217	-7.8
ZINC000001158461	-7.8
ZINC000001318428	-7.8
ZINC000001615443	-7.8
ZINC000001774456	-7.8
ZINC000001782740	-7.8
ZINC000002027915	-7.8
ZINC000002102995	-7.8
ZINC000002145307	-7.8
ZINC000002159892	-7.8
ZINC000002188661	-7.8
ZINC000002484265	-7.8
ZINC000002528942	-7.8
ZINC000002864702	-7.8
ZINC000002870023	-7.8
ZINC000002927581	-7.8
ZINC000002989963	-7.8
ZINC000002991806	-7.8
ZINC000004122343	-7.8
ZINC000004166988	-7.8
ZINC000004268957	-7.8
ZINC000004342695	-7.8
ZINC000004487681	-7.8
ZINC000004487689	-7.8
ZINC000004526333	-7.8
ZINC000004740610	-7.8
ZINC000004777225	-7.8
ZINC000004783178	-7.8
ZINC000004814545	-7.8
ZINC000004867717	-7.8
ZINC000005123741	-7.8
ZINC000005194973	-7.8
ZINC000005205909	-7.8
ZINC000005322696	-7.8
ZINC000005346677	-7.8
ZINC000005378372	-7.8
ZINC000006660177	-7.8
ZINC000006759497	-7.8
ZINC000006760720	-7.8
ZINC000006767083	-7.8
ZINC000006917923	-7.8
ZINC000007006538	-7.8
ZINC000007608245	-7.8
ZINC000008134493	-7.8
ZINC000008671542	-7.8
ZINC000008765053	-7.8
ZINC000008765178	-7.8
ZINC000008843814	-7.8
ZINC000008916956	-7.8
ZINC000008997482	-7.8
ZINC000009846970	-7.8
ZINC000010146608	-7.8
ZINC000010816916	-7.8
ZINC000011605144	-7.8
ZINC000011865974	-7.8
ZINC000011916204	-7.8
ZINC000011916602	-7.8
ZINC000012371689	-7.8
ZINC000012390210	-7.8
ZINC000012391442	-7.8
ZINC000012662315	-7.8
ZINC000012895148	-7.8
ZINC000012901520	-7.8
ZINC000017440578	-7.8
ZINC000019565308	-7.8
ZINC000019735183	-7.8
ZINC000019787114	-7.8
ZINC000019897830	-7.8
ZINC000019897840	-7.8
ZINC000020573472	-7.8
ZINC000020721992	-7.8
ZINC000020761399	-7.8
ZINC000021911908	-7.8
ZINC000022468146	-7.8
ZINC000025094069	-7.8
ZINC000027662051	-7.8
ZINC000027749413	-7.8
ZINC000027793098	-7.8
ZINC000028288164	-7.8
ZINC000032123846	-7.8
ZINC000032657689	-7.8
ZINC000035485099	-7.8
ZINC000036370090	-7.8
ZINC000040312581	-7.8
ZINC000040313233	-7.8
ZINC000041751762	-7.8
ZINC000049420907	-7.8
ZINC000049538545	-7.8
ZINC000049543583	-7.8
ZINC000049543714	-7.8
ZINC000049543817	-7.8
ZINC000056452575	-7.8
ZINC000060349754	-7.8
ZINC000062001317	-7.8
ZINC000065248722	-7.8
ZINC000072325968	-7.8
ZINC000072326064	-7.8
ZINC000075157255	-7.8
ZINC000075157256	-7.8
ZINC000079189062	-7.8
ZINC000085874716	-7.8
ZINC000096221709	-7.8
ZINC000217919859	-7.8
ZINC000000029974	-7.7
ZINC000000030022	-7.7
ZINC000000030132	-7.7
ZINC000000041419	-7.7
ZINC000000050301	-7.7
ZINC000000051061	-7.7
ZINC000000066503	-7.7
ZINC000000067922	-7.7
ZINC000000091482	-7.7
ZINC000000101561	-7.7
ZINC000000116331	-7.7
ZINC000000128221	-7.7
ZINC000000128609	-7.7
ZINC000000129507	-7.7
ZINC000000182494	-7.7
ZINC000000185016	-7.7
ZINC000000201434	-7.7
ZINC000000206539	-7.7
ZINC000000212481	-7.7
ZINC000000213912	-7.7
ZINC000000258190	-7.7
ZINC000000258631	-7.7
ZINC000000258674	-7.7
ZINC000000263599	-7.7
ZINC000000284203	-7.7
ZINC000000284204	-7.7
ZINC000000284207	-7.7
ZINC000000372650	-7.7
ZINC000000376838	-7.7
ZINC000000409120	-7.7
ZINC000000434475	-7.7
ZINC000000442973	-7.7
ZINC000000445165	-7.7
ZINC000000466407	-7.7
ZINC000000470065	-7.7
ZINC000000480433	-7.7
ZINC000000525729	-7.7
ZINC000000671724	-7.7
ZINC000000682205	-7.7
ZINC000000792717	-7.7
ZINC000000860107	-7.7
ZINC000000860141	-7.7
ZINC000000860155	-7.7
ZINC000000860279	-7.7
ZINC000000865089	-7.7
ZINC000000890176	-7.7
ZINC000000893196	-7.7
ZINC000000946923	-7.7
ZINC000000947079	-7.7
ZINC000000968250	-7.7
ZINC000000994241	-7.7
ZINC000001088681	-7.7
ZINC000001103465	-7.7
ZINC000001230435	-7.7
ZINC000001428655	-7.7
ZINC000001750389	-7.7
ZINC000001750406	-7.7
ZINC000001773231	-7.7
ZINC000001774486	-7.7
ZINC000001831993	-7.7
ZINC000002097661	-7.7
ZINC000002103800	-7.7
ZINC000002105433	-7.7
ZINC000002149920	-7.7
ZINC000002150900	-7.7
ZINC000002156211	-7.7
ZINC000002156214	-7.7
ZINC000002191012	-7.7
ZINC000002317234	-7.7
ZINC000002380258	-7.7
ZINC000002721476	-7.7
ZINC000002748138	-7.7
ZINC000002790563	-7.7
ZINC000002836315	-7.7
ZINC000002860321	-7.7
ZINC000002899147	-7.7
ZINC000002901768	-7.7
ZINC000002927614	-7.7
ZINC000002989570	-7.7
ZINC000003026355	-7.7
ZINC000003061941	-7.7
ZINC000003131890	-7.7
ZINC000003900165	-7.7
ZINC000004028110	-7.7
ZINC000004340571	-7.7
ZINC000004487668	-7.7
ZINC000004815800	-7.7
ZINC000004943594	-7.7
ZINC000005063606	-7.7
ZINC000005217329	-7.7
ZINC000005960294	-7.7
ZINC000006736823	-7.7
ZINC000006751943	-7.7
ZINC000006760482	-7.7
ZINC000006766260	-7.7
ZINC000006917981	-7.7
ZINC000006920168	-7.7
ZINC000006946433	-7.7
ZINC000006946530	-7.7
ZINC000006947039	-7.7
ZINC000008764453	-7.7
ZINC000008764703	-7.7
ZINC000008828717	-7.7
ZINC000009133953	-7.7
ZINC000011689918	-7.7
ZINC000012296850	-7.7
ZINC000012321316	-7.7
ZINC000012383591	-7.7
ZINC000012861531	-7.7
ZINC000015424180	-7.7
ZINC000016985471	-7.7
ZINC000019797601	-7.7
ZINC000019897816	-7.7
ZINC000019897831	-7.7
ZINC000019897885	-7.7
ZINC000019897886	-7.7
ZINC000020740781	-7.7
ZINC000021517131	-7.7
ZINC000022468174	-7.7
ZINC000027662043	-7.7
ZINC000027662049	-7.7
ZINC000027667631	-7.7
ZINC000027746404	-7.7
ZINC000027749423	-7.7
ZINC000036369838	-7.7
ZINC000036369871	-7.7
ZINC000037913314	-7.7
ZINC000040309125	-7.7
ZINC000040309958	-7.7
ZINC000049537251	-7.7
ZINC000049543474	-7.7
ZINC000049543571	-7.7
ZINC000057419992	-7.7
ZINC000062005038	-7.7
ZINC000070666242	-7.7
ZINC000072324623	-7.7
ZINC000072326109	-7.7
ZINC000085875063	-7.7
ZINC000085879126	-7.7
ZINC000096114265	-7.7
ZINC000096114266	-7.7
ZINC000217919943	-7.7
ZINC000000025570	-7.6
ZINC000000026546	-7.6
ZINC000000030554	-7.6
ZINC000000030767	-7.6
ZINC000000037563	-7.6
ZINC000000040881	-7.6
ZINC000000044432	-7.6
ZINC000000053903	-7.6
ZINC000000054730	-7.6
ZINC000000056758	-7.6
ZINC000000073853	-7.6
ZINC000000077856	-7.6
ZINC000000091488	-7.6
ZINC000000121330	-7.6
ZINC000000130061	-7.6
ZINC000000155335	-7.6
ZINC000000176707	-7.6
ZINC000000176897	-7.6
ZINC000000183691	-7.6
ZINC000000183870	-7.6
ZINC000000185771	-7.6
ZINC000000189099	-7.6
ZINC000000206542	-7.6
ZINC000000258186	-7.6
ZINC000000261835	-7.6
ZINC000000262537	-7.6
ZINC000000294101	-7.6
ZINC000000303107	-7.6
ZINC000000303384	-7.6
ZINC000000305336	-7.6
ZINC000000349952	-7.6
ZINC000000362420	-7.6
ZINC000000467045	-7.6
ZINC000000489613	-7.6
ZINC000000520171	-7.6
ZINC000000619286	-7.6
ZINC000000661173	-7.6
ZINC000000725196	-7.6
ZINC000000851764	-7.6
ZINC000000893185	-7.6
ZINC000000893203	-7.6
ZINC000000947087	-7.6
ZINC000001005761	-7.6
ZINC000001097941	-7.6
ZINC000001676264	-7.6
ZINC000001735630	-7.6
ZINC000001748810	-7.6
ZINC000001774457	-7.6
ZINC000001927096	-7.6
ZINC000002075614	-7.6
ZINC000002119581	-7.6
ZINC000002596069	-7.6
ZINC000002829673	-7.6
ZINC000002837585	-7.6
ZINC000002847015	-7.6
ZINC000002854746	-7.6
ZINC000002855315	-7.6
ZINC000002860352	-7.6
ZINC000002864574	-7.6
ZINC000002864713	-7.6
ZINC000002869976	-7.6
ZINC000002870303	-7.6
ZINC000002899145	-7.6
ZINC000002910499	-7.6
ZINC000002927575	-7.6
ZINC000002998809	-7.6
ZINC000003061940	-7.6
ZINC000003061942	-7.6
ZINC000003117430	-7.6
ZINC000003117431	-7.6
ZINC000003614799	-7.6
ZINC000004084495	-7.6
ZINC000004089576	-7.6
ZINC000004090069	-7.6
ZINC000004118157	-7.6
ZINC000004122329	-7.6
ZINC000004173627	-7.6
ZINC000004340572	-7.6
ZINC000004342709	-7.6
ZINC000004616403	-7.6
ZINC000004703143	-7.6
ZINC000005378112	-7.6
ZINC000005782792	-7.6
ZINC000005960281	-7.6
ZINC000006490294	-7.6
ZINC000006751102	-7.6
ZINC000008764617	-7.6
ZINC000008879315	-7.6
ZINC000008879949	-7.6
ZINC000008917444	-7.6
ZINC000009215973	-7.6
ZINC000011535727	-7.6
ZINC000011916187	-7.6
ZINC000012062768	-7.6
ZINC000012381438	-7.6
ZINC000012383592	-7.6
ZINC000012896032	-7.6
ZINC000012898013	-7.6
ZINC000013557241	-7.6
ZINC000017911475	-7.6
ZINC000019237228	-7.6
ZINC000019606455	-7.6
ZINC000019902223	-7.6
ZINC000019902225	-7.6
ZINC000020547066	-7.6
ZINC000021883190	-7.6
ZINC000022468121	-7.6
ZINC000022468162	-7.6
ZINC000022468168	-7.6
ZINC000031035431	-7.6
ZINC000031437092	-7.6
ZINC000032124447	-7.6
ZINC000032124514	-7.6
ZINC000032801113	-7.6
ZINC000036369903	-7.6
ZINC000036369994	-7.6
ZINC000037432649	-7.6
ZINC000040309416	-7.6
ZINC000040313296	-7.6
ZINC000049543644	-7.6
ZINC000062001308	-7.6
ZINC000070666234	-7.6
ZINC000072326103	-7.6
ZINC000170625470	-7.6
ZINC000170625750	-7.6
ZINC000170625767	-7.6
ZINC000230209524	-7.6
ZINC000000029649	-7.5
ZINC000000029931	-7.5
ZINC000000036001	-7.5
ZINC000000037223	-7.5
ZINC000000042678	-7.5
ZINC000000050302	-7.5
ZINC000000056773	-7.5
ZINC000000058049	-7.5
ZINC000000067874	-7.5
ZINC000000075756	-7.5
ZINC000000091481	-7.5
ZINC000000107108	-7.5
ZINC000000121860	-7.5
ZINC000000138214	-7.5
ZINC000000138238	-7.5
ZINC000000172228	-7.5
ZINC000000208127	-7.5
ZINC000000213716	-7.5
ZINC000000248378	-7.5
ZINC000000259710	-7.5
ZINC000000265414	-7.5
ZINC000000267288	-7.5
ZINC000000267823	-7.5
ZINC000000293660	-7.5
ZINC000000302022	-7.5
ZINC000000303965	-7.5
ZINC000000309702	-7.5
ZINC000000319492	-7.5
ZINC000000332706	-7.5
ZINC000000405248	-7.5
ZINC000000426261	-7.5
ZINC000000445415	-7.5
ZINC000000459526	-7.5
ZINC000000467745	-7.5
ZINC000000619844	-7.5
ZINC000000782991	-7.5
ZINC000000850431	-7.5
ZINC000000892937	-7.5
ZINC000000893162	-7.5
ZINC000000917430	-7.5
ZINC000000968723	-7.5
ZINC000001083472	-7.5
ZINC000001107903	-7.5
ZINC000001156236	-7.5
[truncated: 1,094 more rows]

## Sheet: Suppl._Table_3
Supplementary table 3. Molecular docking-basead virtual screening of 3,092 natural products on the nucleotide-binding pocket of 3TM0
Natural products	Vina score with 3TM0
ZINC000004081983	-11.1
ZINC000015498603	-11.1
ZINC000013593437	-10.9
ZINC000000952700	-10.5
ZINC000031205183	-10.5
ZINC000014793040	-10.4
ZINC000017295598	-10.4
ZINC000018074517	-10.4
ZINC000065248705	-10.4
ZINC000002295637	-10.3
ZINC000000629674	-10.2
ZINC000000851781	-10.2
ZINC000000970801	-10.2
ZINC000002995638	-10.2
ZINC000010691968	-10.2
ZINC000010692210	-10.2
ZINC000023573167	-10.2
ZINC000027747016	-10.2
ZINC000040310053	-10.2
ZINC000004327979	-10.1
ZINC000005222143	-10.1
ZINC000008764386	-10.1
ZINC000008765014	-10.1
ZINC000010691961	-10.1
ZINC000010692217	-10.1
ZINC000012296832	-10.1
ZINC000013593433	-10.1
ZINC000015616332	-10.1
ZINC000017295613	-10.1
ZINC000031205304	-10.1
ZINC000040309443	-10.1
ZINC000055027966	-10.1
ZINC000062001419	-10.1
ZINC000065248687	-10.1
ZINC000000649629	-10
ZINC000001193126	-10
ZINC000002273547	-10
ZINC000005186286	-10
ZINC000009418760	-10
ZINC000011865975	-10
ZINC000012364222	-10
ZINC000018074513	-10
ZINC000027747024	-10
ZINC000033267221	-10
ZINC000085879798	-10
ZINC000000705352	-9.9
ZINC000000940123	-9.9
ZINC000001181775	-9.9
ZINC000003532863	-9.9
ZINC000005265775	-9.9
ZINC000019626257	-9.9
ZINC000023573165	-9.9
ZINC000040309335	-9.9
ZINC000000036029	-9.8
ZINC000000547223	-9.8
ZINC000000716751	-9.8
ZINC000001043659	-9.8
ZINC000001056954	-9.8
ZINC000001081655	-9.8
ZINC000002313470	-9.8
ZINC000003598909	-9.8
ZINC000005186283	-9.8
ZINC000008765057	-9.8
ZINC000008765505	-9.8
ZINC000009355767	-9.8
ZINC000009970585	-9.8
ZINC000012296790	-9.8
ZINC000013655372	-9.8
ZINC000018074516	-9.8
ZINC000031034672	-9.8
ZINC000065248704	-9.8
ZINC000065248826	-9.8
ZINC000253395575	-9.8
ZINC000000054796	-9.7
ZINC000000062430	-9.7
ZINC000000129483	-9.7
ZINC000000299218	-9.7
ZINC000000643416	-9.7
ZINC000000729798	-9.7
ZINC000000895394	-9.7
ZINC000000985309	-9.7
ZINC000001043658	-9.7
ZINC000001056072	-9.7
ZINC000004041573	-9.7
ZINC000004593481	-9.7
ZINC000005123741	-9.7
ZINC000005186281	-9.7
ZINC000005350310	-9.7
ZINC000007006309	-9.7
ZINC000007646291	-9.7
ZINC000012895139	-9.7
ZINC000012896067	-9.7
ZINC000012902395	-9.7
ZINC000034786191	-9.7
ZINC000054219980	-9.7
ZINC000062001304	-9.7
ZINC000062001380	-9.7
ZINC000075155689	-9.7
ZINC000075155690	-9.7
ZINC000095479167	-9.7
ZINC000096116164	-9.7
ZINC000096221709	-9.7
ZINC000000076861	-9.6
ZINC000000485974	-9.6
ZINC000000645768	-9.6
ZINC000000938341	-9.6
ZINC000000945277	-9.6
ZINC000000980824	-9.6
ZINC000002663838	-9.6
ZINC000004038781	-9.6
ZINC000004325593	-9.6
ZINC000004821129	-9.6
ZINC000005163218	-9.6
ZINC000006659844	-9.6
ZINC000006760504	-9.6
ZINC000007005316	-9.6
ZINC000007309056	-9.6
ZINC000008764432	-9.6
ZINC000008764696	-9.6
ZINC000011865977	-9.6
ZINC000011867273	-9.6
ZINC000012296920	-9.6
ZINC000012458366	-9.6
ZINC000012900838	-9.6
ZINC000015634187	-9.6
ZINC000027403539	-9.6
ZINC000032123999	-9.6
ZINC000032124460	-9.6
ZINC000036370093	-9.6
ZINC000036370094	-9.6
ZINC000040309014	-9.6
ZINC000062001396	-9.6
ZINC000062001410	-9.6
ZINC000065248813	-9.6
ZINC000065248829	-9.6
ZINC000072324441	-9.6
ZINC000072324968	-9.6
ZINC000079189191	-9.6
ZINC000253395576	-9.6
ZINC000000082459	-9.5
ZINC000000252965	-9.5
ZINC000000361920	-9.5
ZINC000000497416	-9.5
ZINC000000715403	-9.5
ZINC000000864974	-9.5
ZINC000000970802	-9.5
ZINC000001782109	-9.5
ZINC000002932920	-9.5
ZINC000003567049	-9.5
ZINC000004023882	-9.5
ZINC000004743727	-9.5
ZINC000004941192	-9.5
ZINC000005252569	-9.5
ZINC000005252578	-9.5
ZINC000007609872	-9.5
ZINC000008764377	-9.5
ZINC000008764734	-9.5
ZINC000008764808	-9.5
ZINC000008765056	-9.5
ZINC000012897137	-9.5
ZINC000012900631	-9.5
ZINC000015514750	-9.5
ZINC000017845496	-9.5
ZINC000020760935	-9.5
ZINC000020761909	-9.5
ZINC000022766651	-9.5
ZINC000027749413	-9.5
ZINC000031035270	-9.5
ZINC000032124207	-9.5
ZINC000036370049	-9.5
ZINC000040310323	-9.5
ZINC000054105911	-9.5
ZINC000062001634	-9.5
ZINC000065248812	-9.5
ZINC000100787891	-9.5
ZINC000000030231	-9.4
ZINC000000037387	-9.4
ZINC000000490459	-9.4
ZINC000000726166	-9.4
ZINC000000789521	-9.4
ZINC000000851775	-9.4
ZINC000000881318	-9.4
ZINC000000882730	-9.4
ZINC000001000138	-9.4
ZINC000001056920	-9.4
ZINC000001076065	-9.4
ZINC000001180854	-9.4
ZINC000001774452	-9.4
ZINC000002137292	-9.4
ZINC000002205059	-9.4
ZINC000002954356	-9.4
ZINC000004074101	-9.4
ZINC000004112271	-9.4
ZINC000004314925	-9.4
ZINC000004511287	-9.4
ZINC000004511289	-9.4
ZINC000004754367	-9.4
ZINC000004834423	-9.4
ZINC000004857359	-9.4
ZINC000005630934	-9.4
ZINC000006285205	-9.4
ZINC000006659873	-9.4
ZINC000006659874	-9.4
ZINC000007767413	-9.4
ZINC000007971486	-9.4
ZINC000008764227	-9.4
ZINC000008765013	-9.4
ZINC000008765016	-9.4
ZINC000008765338	-9.4
ZINC000008856458	-9.4
ZINC000009419002	-9.4
ZINC000010220491	-9.4
ZINC000010896238	-9.4
ZINC000012420464	-9.4
ZINC000012901074	-9.4
ZINC000013548665	-9.4
ZINC000013572042	-9.4
ZINC000013655690	-9.4
ZINC000017295740	-9.4
ZINC000019626261	-9.4
ZINC000019938173	-9.4
ZINC000020573515	-9.4
ZINC000020573540	-9.4
ZINC000020623794	-9.4
ZINC000031238808	-9.4
ZINC000031239566	-9.4
ZINC000036369849	-9.4
ZINC000040310314	-9.4
ZINC000062001300	-9.4
ZINC000062001579	-9.4
ZINC000063829210	-9.4
ZINC000064568301	-9.4
ZINC000065248738	-9.4
ZINC000070666235	-9.4
ZINC000170625415	-9.4
ZINC000217836748	-9.4
ZINC000000048259	-9.3
ZINC000000082732	-9.3
ZINC000000214503	-9.3
ZINC000000226663	-9.3
ZINC000000252950	-9.3
ZINC000000420319	-9.3
ZINC000000535116	-9.3
ZINC000000636759	-9.3
ZINC000000671043	-9.3
ZINC000000715423	-9.3
ZINC000000727753	-9.3
ZINC000000797604	-9.3
ZINC000000851790	-9.3
ZINC000000872110	-9.3
ZINC000000940064	-9.3
ZINC000001033116	-9.3
ZINC000001056074	-9.3
ZINC000001056531	-9.3
ZINC000001206269	-9.3
ZINC000001776401	-9.3
ZINC000002927517	-9.3
ZINC000002954357	-9.3
ZINC000003070964	-9.3
ZINC000003087481	-9.3
ZINC000004722167	-9.3
ZINC000004740491	-9.3
ZINC000004740496	-9.3
ZINC000005163649	-9.3
ZINC000005252582	-9.3
ZINC000005304982	-9.3
ZINC000005378510	-9.3
ZINC000006228377	-9.3
ZINC000006421318	-9.3
ZINC000006759854	-9.3
ZINC000008764453	-9.3
ZINC000009184292	-9.3
ZINC000011865133	-9.3
ZINC000012421821	-9.3
ZINC000013629969	-9.3
ZINC000013653561	-9.3
ZINC000015511641	-9.3
ZINC000015634188	-9.3
ZINC000017370419	-9.3
ZINC000020761444	-9.3
ZINC000022752975	-9.3
ZINC000023973566	-9.3
ZINC000026524149	-9.3
ZINC000027667725	-9.3
ZINC000027749433	-9.3
ZINC000032091280	-9.3
ZINC000032123832	-9.3
ZINC000032124125	-9.3
ZINC000035376326	-9.3
ZINC000036099418	-9.3
ZINC000036370048	-9.3
ZINC000038541161	-9.3
ZINC000040310270	-9.3
ZINC000040312660	-9.3
ZINC000040313049	-9.3
ZINC000041428388	-9.3
ZINC000045130783	-9.3
ZINC000049513423	-9.3
ZINC000055044019	-9.3
ZINC000065248714	-9.3
ZINC000070666358	-9.3
ZINC000070666562	-9.3
ZINC000070666648	-9.3
ZINC000072324730	-9.3
ZINC000096116500	-9.3
ZINC000096116521	-9.3
ZINC000096221891	-9.3
ZINC000096222528	-9.3
ZINC000000075050	-9.2
ZINC000000093725	-9.2
ZINC000000121773	-9.2
ZINC000000123440	-9.2
ZINC000000139406	-9.2
ZINC000000252937	-9.2
ZINC000000287767	-9.2
ZINC000000490460	-9.2
ZINC000000519805	-9.2
ZINC000000526112	-9.2
ZINC000000784164	-9.2
ZINC000000858419	-9.2
ZINC000000862857	-9.2
ZINC000000940063	-9.2
ZINC000000940122	-9.2
ZINC000001061009	-9.2
ZINC000001095603	-9.2
ZINC000001103131	-9.2
ZINC000001230512	-9.2
ZINC000001253313	-9.2
ZINC000001414401	-9.2
ZINC000001431477	-9.2
ZINC000001431982	-9.2
ZINC000001812713	-9.2
ZINC000002117358	-9.2
ZINC000002440299	-9.2
ZINC000002739191	-9.2
ZINC000003532866	-9.2
ZINC000004171960	-9.2
ZINC000004435433	-9.2
ZINC000004520329	-9.2
ZINC000004687314	-9.2
ZINC000004740494	-9.2
ZINC000004941191	-9.2
ZINC000005140805	-9.2
ZINC000005164114	-9.2
ZINC000005346547	-9.2
ZINC000005556278	-9.2
ZINC000005960258	-9.2
ZINC000006188551	-9.2
ZINC000006719077	-9.2
ZINC000006732687	-9.2
ZINC000006750389	-9.2
ZINC000006751924	-9.2
ZINC000006756098	-9.2
ZINC000006945956	-9.2
ZINC000006948145	-9.2
ZINC000007968746	-9.2
ZINC000008156839	-9.2
ZINC000008764270	-9.2
ZINC000008879755	-9.2
ZINC000008997481	-9.2
ZINC000009485381	-9.2
ZINC000011689918	-9.2
ZINC000012893432	-9.2
ZINC000012894021	-9.2
ZINC000012899768	-9.2
ZINC000015511559	-9.2
ZINC000015658352	-9.2
ZINC000016469236	-9.2
ZINC000018074512	-9.2
ZINC000020149715	-9.2
ZINC000020589218	-9.2
ZINC000020733688	-9.2
ZINC000020762756	-9.2
ZINC000021897756	-9.2
ZINC000032124479	-9.2
ZINC000036369966	-9.2
ZINC000040309154	-9.2
ZINC000040309212	-9.2
ZINC000040310251	-9.2
ZINC000040312427	-9.2
ZINC000041296414	-9.2
ZINC000054219982	-9.2
ZINC000056451756	-9.2
ZINC000057268629	-9.2
ZINC000072324644	-9.2
ZINC000072324929	-9.2
ZINC000072325745	-9.2
ZINC000000036322	-9.1
ZINC000000048966	-9.1
ZINC000000051235	-9.1
ZINC000000052258	-9.1
ZINC000000086306	-9.1
ZINC000000091600	-9.1
ZINC000000121860	-9.1
ZINC000000252947	-9.1
ZINC000000263629	-9.1
ZINC000000277750	-9.1
ZINC000000348815	-9.1
ZINC000000407129	-9.1
ZINC000000407802	-9.1
ZINC000000619505	-9.1
ZINC000000645767	-9.1
ZINC000000792717	-9.1
ZINC000000800005	-9.1
ZINC000000851402	-9.1
ZINC000000851756	-9.1
ZINC000000851782	-9.1
ZINC000000851800	-9.1
ZINC000000893196	-9.1
ZINC000000893203	-9.1
ZINC000000898099	-9.1
ZINC000000995046	-9.1
ZINC000001156352	-9.1
ZINC000001428655	-9.1
ZINC000001774172	-9.1
ZINC000001774455	-9.1
ZINC000002120125	-9.1
ZINC000002146465	-9.1
ZINC000002150596	-9.1
ZINC000002223842	-9.1
ZINC000002433715	-9.1
ZINC000002442605	-9.1
ZINC000002816522	-9.1
ZINC000002927579	-9.1
ZINC000004041116	-9.1
ZINC000004089132	-9.1
ZINC000004520331	-9.1
ZINC000004538911	-9.1
ZINC000004710851	-9.1
ZINC000004743662	-9.1
ZINC000004826940	-9.1
ZINC000005177425	-9.1
ZINC000005266402	-9.1
ZINC000006428244	-9.1
ZINC000006724282	-9.1
ZINC000006732688	-9.1
ZINC000006760322	-9.1
ZINC000006847728	-9.1
ZINC000006947046	-9.1
ZINC000007608804	-9.1
ZINC000007770866	-9.1
ZINC000008671542	-9.1
ZINC000009085200	-9.1
ZINC000009419283	-9.1
ZINC000009420622	-9.1
ZINC000009486197	-9.1
ZINC000009532155	-9.1
ZINC000009668499	-9.1
ZINC000011866008	-9.1
ZINC000011866009	-9.1
ZINC000012390210	-9.1
ZINC000015513464	-9.1
ZINC000016740609	-9.1
ZINC000016753970	-9.1
ZINC000020348995	-9.1
ZINC000020427691	-9.1
ZINC000022609257	-9.1
ZINC000022638023	-9.1
ZINC000027794415	-9.1
ZINC000032124196	-9.1
ZINC000036139388	-9.1
ZINC000040312939	-9.1
ZINC000040313052	-9.1
ZINC000040313055	-9.1
ZINC000040313185	-9.1
ZINC000041146470	-9.1
ZINC000049543708	-9.1
ZINC000054105913	-9.1
ZINC000062001586	-9.1
ZINC000070666286	-9.1
ZINC000072325780	-9.1
ZINC000079193450	-9.1
ZINC000085875089	-9.1
ZINC000170625487	-9.1
ZINC000217919943	-9.1
ZINC000253414997	-9.1
ZINC000000037946	-9
ZINC000000053390	-9
ZINC000000085850	-9
ZINC000000100039	-9
ZINC000000129487	-9
ZINC000000129499	-9
ZINC000000263543	-9
ZINC000000263599	-9
ZINC000000268624	-9
ZINC000000303965	-9
ZINC000000351988	-9
ZINC000000429239	-9
ZINC000000488975	-9
ZINC000000547821	-9
ZINC000000622396	-9
ZINC000000626134	-9
ZINC000000626450	-9
ZINC000000663198	-9
ZINC000000774899	-9
ZINC000000790591	-9
ZINC000000846556	-9
ZINC000000849954	-9
ZINC000000851762	-9
ZINC000000851783	-9
ZINC000000881320	-9
ZINC000000917430	-9
ZINC000000952697	-9
ZINC000001134403	-9
ZINC000001147793	-9
ZINC000001177649	-9
ZINC000001183363	-9
ZINC000001428710	-9
ZINC000001812712	-9
ZINC000002435963	-9
ZINC000002873306	-9
ZINC000002927662	-9
ZINC000003019221	-9
ZINC000003033906	-9
ZINC000003117430	-9
ZINC000003567051	-9
ZINC000003598836	-9
ZINC000003645863	-9
ZINC000004084925	-9
ZINC000004151766	-9
ZINC000004487680	-9
ZINC000004580100	-9
ZINC000005163698	-9
ZINC000005194973	-9
ZINC000005324266	-9
ZINC000005960278	-9
ZINC000006170743	-9
ZINC000006660177	-9
ZINC000006660179	-9
ZINC000006719986	-9
ZINC000006724557	-9
ZINC000006727258	-9
ZINC000006942860	-9
ZINC000006947000	-9
ZINC000008287180	-9
ZINC000008764381	-9
ZINC000008916787	-9
ZINC000008917213	-9
ZINC000009184550	-9
ZINC000009940895	-9
ZINC000011865974	-9
ZINC000012296791	-9
ZINC000012894938	-9
ZINC000015511616	-9
ZINC000015739216	-9
ZINC000016850754	-9
ZINC000020193380	-9
ZINC000025094069	-9
ZINC000027793184	-9
ZINC000031437095	-9
ZINC000032124320	-9
ZINC000032124340	-9
ZINC000032124344	-9
ZINC000035485099	-9
ZINC000036370010	-9
ZINC000036370107	-9
ZINC000040309997	-9
ZINC000040310308	-9
ZINC000041127953	-9
ZINC000041146472	-9
ZINC000055441332	-9
ZINC000056452763	-9
ZINC000062001349	-9
ZINC000065248686	-9
ZINC000070666561	-9
ZINC000070666610	-9
ZINC000070666621	-9
ZINC000070666646	-9
ZINC000072324467	-9
ZINC000072324853	-9
ZINC000072324946	-9
ZINC000072324966	-9
ZINC000072325084	-9
ZINC000072325968	-9
ZINC000072326175	-9
ZINC000079189544	-9
ZINC000096115530	-9
ZINC000217666784	-9
ZINC000000047236	-8.9
ZINC000000049564	-8.9
ZINC000000084016	-8.9
ZINC000000088393	-8.9
ZINC000000139047	-8.9
ZINC000000176670	-8.9
ZINC000000181783	-8.9
ZINC000000204257	-8.9
ZINC000000217204	-8.9
ZINC000000263653	-8.9
ZINC000000307989	-8.9
ZINC000000340372	-8.9
ZINC000000422917	-8.9
ZINC000000434185	-8.9
ZINC000000464051	-8.9
ZINC000000465698	-8.9
ZINC000000488867	-8.9
ZINC000000488963	-8.9
ZINC000000616244	-8.9
ZINC000000677522	-8.9
ZINC000000725545	-8.9
ZINC000000790589	-8.9
ZINC000000796549	-8.9
ZINC000000797605	-8.9
ZINC000000839113	-8.9
ZINC000000852673	-8.9
ZINC000000947829	-8.9
ZINC000000973911	-8.9
ZINC000001158461	-8.9
ZINC000001459962	-8.9
ZINC000001831688	-8.9
ZINC000002027915	-8.9
ZINC000002120006	-8.9
ZINC000002125110	-8.9
ZINC000002219622	-8.9
ZINC000002262654	-8.9
ZINC000002314305	-8.9
ZINC000002361668	-8.9
ZINC000002479361	-8.9
ZINC000002864702	-8.9
ZINC000003634344	-8.9
ZINC000003833919	-8.9
ZINC000003984924	-8.9
ZINC000004046033	-8.9
ZINC000004071072	-8.9
ZINC000004314036	-8.9
ZINC000004487700	-8.9
ZINC000004563192	-8.9
ZINC000004933309	-8.9
ZINC000005141342	-8.9
ZINC000005163220	-8.9
ZINC000005184167	-8.9
ZINC000005184209	-8.9
ZINC000005221405	-8.9
ZINC000005221630	-8.9
ZINC000005272523	-8.9
ZINC000005351131	-8.9
ZINC000006661189	-8.9
ZINC000006736835	-8.9
ZINC000006755479	-8.9
ZINC000006942805	-8.9
ZINC000006947039	-8.9
ZINC000007941110	-8.9
ZINC000008734454	-8.9
ZINC000008764460	-8.9
ZINC000008764721	-8.9
ZINC000008764953	-8.9
ZINC000008764985	-8.9
ZINC000008916786	-8.9
ZINC000009095535	-8.9
ZINC000009095536	-8.9
ZINC000009776584	-8.9
ZINC000010220492	-8.9
ZINC000011867272	-8.9
ZINC000012894375	-8.9
ZINC000012895148	-8.9
ZINC000012900626	-8.9
ZINC000012901520	-8.9
ZINC000013688865	-8.9
ZINC000015632981	-8.9
ZINC000015721906	-8.9
ZINC000016849161	-8.9
ZINC000019720165	-8.9
ZINC000019902223	-8.9
ZINC000020412466	-8.9
ZINC000020436649	-8.9
ZINC000020533805	-8.9
ZINC000020731356	-8.9
ZINC000020889869	-8.9
ZINC000020889873	-8.9
ZINC000021175073	-8.9
ZINC000021932812	-8.9
ZINC000027662049	-8.9
ZINC000027667834	-8.9
ZINC000027667836	-8.9
ZINC000027793096	-8.9
ZINC000027794412	-8.9
ZINC000031034621	-8.9
ZINC000031840679	-8.9
ZINC000032123936	-8.9
ZINC000032124206	-8.9
ZINC000032124400	-8.9
ZINC000035363889	-8.9
ZINC000036370090	-8.9
ZINC000040309010	-8.9
ZINC000040309072	-8.9
ZINC000040312473	-8.9
ZINC000040312825	-8.9
ZINC000042025246	-8.9
ZINC000044652242	-8.9
ZINC000062001451	-8.9
ZINC000064384165	-8.9
ZINC000064568304	-8.9
ZINC000064818409	-8.9
ZINC000065248685	-8.9
ZINC000065248707	-8.9
ZINC000072325228	-8.9
ZINC000082138166	-8.9
ZINC000085875067	-8.9
ZINC000085876604	-8.9
ZINC000096114513	-8.9
ZINC000096115529	-8.9
ZINC000096221803	-8.9
ZINC000096222341	-8.9
ZINC000100447609	-8.9
ZINC000116692853	-8.9
ZINC000181014801	-8.9
ZINC000230209524	-8.9
ZINC000000037926	-8.8
ZINC000000037947	-8.8
ZINC000000050302	-8.8
ZINC000000073853	-8.8
ZINC000000075063	-8.8
ZINC000000077337	-8.8
ZINC000000082960	-8.8
ZINC000000117162	-8.8
ZINC000000122544	-8.8
ZINC000000185010	-8.8
ZINC000000200921	-8.8
ZINC000000214590	-8.8
ZINC000000252942	-8.8
ZINC000000252954	-8.8
ZINC000000263687	-8.8
ZINC000000267823	-8.8
ZINC000000287711	-8.8
ZINC000000287773	-8.8
ZINC000000389336	-8.8
ZINC000000433184	-8.8
ZINC000000434079	-8.8
ZINC000000488054	-8.8
ZINC000000488868	-8.8
ZINC000000526760	-8.8
ZINC000000528975	-8.8
ZINC000000545897	-8.8
ZINC000000626906	-8.8
ZINC000000674221	-8.8
ZINC000000727754	-8.8
ZINC000000790603	-8.8
ZINC000000834044	-8.8
ZINC000000846624	-8.8
ZINC000000846901	-8.8
ZINC000000869721	-8.8
ZINC000000898145	-8.8
ZINC000000940124	-8.8
ZINC000000973204	-8.8
ZINC000000985047	-8.8
ZINC000001076066	-8.8
ZINC000001140989	-8.8
ZINC000001177436	-8.8
ZINC000001326078	-8.8
ZINC000001801245	-8.8
ZINC000002130040	-8.8
ZINC000002156096	-8.8
ZINC000002241474	-8.8
ZINC000002325434	-8.8
ZINC000002350392	-8.8
ZINC000002623960	-8.8
ZINC000002760562	-8.8
ZINC000002829673	-8.8
ZINC000002855314	-8.8
ZINC000002989570	-8.8
ZINC000003020051	-8.8
ZINC000003117429	-8.8
ZINC000003598839	-8.8
ZINC000003899577	-8.8
ZINC000004056187	-8.8
ZINC000004162883	-8.8
ZINC000004409957	-8.8
ZINC000004487678	-8.8
ZINC000004487684	-8.8
ZINC000004777225	-8.8
ZINC000004815800	-8.8
ZINC000004867717	-8.8
ZINC000004933099	-8.8
ZINC000005157016	-8.8
ZINC000005203961	-8.8
ZINC000005347408	-8.8
ZINC000005347522	-8.8
ZINC000005442713	-8.8
ZINC000005442715	-8.8
ZINC000006727259	-8.8
ZINC000006766255	-8.8
ZINC000006767084	-8.8
ZINC000006945929	-8.8
ZINC000007608245	-8.8
ZINC000007608976	-8.8
ZINC000008331791	-8.8
ZINC000008739329	-8.8
ZINC000008765178	-8.8
ZINC000008765244	-8.8
ZINC000008765456	-8.8
ZINC000008828717	-8.8
ZINC000008917444	-8.8
ZINC000009614689	-8.8
ZINC000009776582	-8.8
ZINC000011689965	-8.8
ZINC000011689966	-8.8
ZINC000011764554	-8.8
ZINC000012063020	-8.8
ZINC000012895456	-8.8
ZINC000012895461	-8.8
ZINC000012898325	-8.8
ZINC000012902904	-8.8
ZINC000013259981	-8.8
ZINC000013534584	-8.8
ZINC000013682180	-8.8
ZINC000014890901	-8.8
ZINC000015721630	-8.8
ZINC000015721861	-8.8
ZINC000015721863	-8.8
ZINC000016645732	-8.8
ZINC000016705926	-8.8
ZINC000017127731	-8.8
ZINC000017911472	-8.8
ZINC000017911589	-8.8
ZINC000020427682	-8.8
ZINC000020740781	-8.8
ZINC000020762090	-8.8
ZINC000020763563	-8.8
ZINC000022766654	-8.8
ZINC000024973004	-8.8
ZINC000027667631	-8.8
ZINC000027667712	-8.8
ZINC000027667724	-8.8
ZINC000027746404	-8.8
ZINC000030654091	-8.8
ZINC000031239902	-8.8
ZINC000032200440	-8.8
ZINC000032491914	-8.8
ZINC000034689318	-8.8
ZINC000035485065	-8.8
ZINC000040309308	-8.8
ZINC000040309725	-8.8
ZINC000040309767	-8.8
ZINC000040310009	-8.8
ZINC000040312544	-8.8
ZINC000040312888	-8.8
ZINC000040312963	-8.8
ZINC000040313037	-8.8
ZINC000055253349	-8.8
ZINC000056452021	-8.8
ZINC000057419387	-8.8
ZINC000062001517	-8.8
ZINC000062001828	-8.8
ZINC000063829072	-8.8
ZINC000070666344	-8.8
ZINC000072324736	-8.8
ZINC000072324908	-8.8
ZINC000075437336	-8.8
ZINC000079191935	-8.8
ZINC000096221940	-8.8
ZINC000170625752	-8.8
ZINC000217656476	-8.8
ZINC000000051236	-8.7
ZINC000000053903	-8.7
ZINC000000077982	-8.7
ZINC000000084773	-8.7
ZINC000000116331	-8.7
ZINC000000117155	-8.7
ZINC000000129480	-8.7
ZINC000000139296	-8.7
ZINC000000170614	-8.7
ZINC000000176707	-8.7
ZINC000000200908	-8.7
ZINC000000202241	-8.7
ZINC000000263644	-8.7
ZINC000000308124	-8.7
ZINC000000319130	-8.7
ZINC000000388180	-8.7
ZINC000000451439	-8.7
ZINC000000451617	-8.7
ZINC000000457424	-8.7
ZINC000000457519	-8.7
ZINC000000459362	-8.7
ZINC000000489352	-8.7
ZINC000000612125	-8.7
ZINC000000626078	-8.7
ZINC000000633911	-8.7
ZINC000000669599	-8.7
ZINC000000709970	-8.7
ZINC000000718336	-8.7
ZINC000000790595	-8.7
ZINC000000811627	-8.7
ZINC000000813617	-8.7
ZINC000000846863	-8.7
ZINC000000851764	-8.7
ZINC000000851801	-8.7
ZINC000000872106	-8.7
ZINC000000946440	-8.7
ZINC000001061006	-8.7
ZINC000001067102	-8.7
ZINC000001164955	-8.7
ZINC000001773231	-8.7
ZINC000001831994	-8.7
ZINC000002097966	-8.7
ZINC000002117097	-8.7
ZINC000002125178	-8.7
ZINC000002380283	-8.7
ZINC000002708392	-8.7
ZINC000002847132	-8.7
ZINC000002927553	-8.7
ZINC000002927642	-8.7
ZINC000002960168	-8.7
ZINC000003117428	-8.7
ZINC000003493707	-8.7
ZINC000004090436	-8.7
ZINC000004185236	-8.7
ZINC000004681690	-8.7
ZINC000004691218	-8.7
ZINC000004743640	-8.7
ZINC000004743653	-8.7
ZINC000004783178	-8.7
ZINC000004814545	-8.7
ZINC000004943594	-8.7
ZINC000005140634	-8.7
ZINC000005179869	-8.7
ZINC000005322696	-8.7
ZINC000006623933	-8.7
ZINC000006736815	-8.7
ZINC000006767483	-8.7
ZINC000006947032	-8.7
ZINC000007966947	-8.7
ZINC000008115511	-8.7
ZINC000008764703	-8.7
ZINC000008917212	-8.7
ZINC000008917443	-8.7
ZINC000010146618	-8.7
ZINC000011865129	-8.7
ZINC000012062834	-8.7
ZINC000012371691	-8.7
ZINC000012383592	-8.7
ZINC000012390160	-8.7
ZINC000012895520	-8.7
ZINC000014891020	-8.7
ZINC000015634041	-8.7
ZINC000015789798	-8.7
ZINC000015867426	-8.7
ZINC000016192612	-8.7
ZINC000016753968	-8.7
ZINC000017911588	-8.7
ZINC000019897818	-8.7
ZINC000020745248	-8.7
ZINC000021095319	-8.7
ZINC000021911914	-8.7
ZINC000022636588	-8.7
ZINC000027662187	-8.7
ZINC000027662189	-8.7
ZINC000027749442	-8.7
ZINC000027793098	-8.7
ZINC000031437092	-8.7
ZINC000032124189	-8.7
ZINC000032124408	-8.7
ZINC000032124524	-8.7
ZINC000034717612	-8.7
ZINC000035514690	-8.7
ZINC000035802400	-8.7
ZINC000036369859	-8.7
ZINC000036369940	-8.7
ZINC000036611944	-8.7
ZINC000040309125	-8.7
ZINC000049420906	-8.7
ZINC000056452804	-8.7
ZINC000062001299	-8.7
ZINC000062001309	-8.7
ZINC000062090016	-8.7
ZINC000064568272	-8.7
ZINC000064677375	-8.7
ZINC000064818391	-8.7
ZINC000065248835	-8.7
ZINC000070666334	-8.7
ZINC000070666586	-8.7
ZINC000072324874	-8.7
ZINC000072324910	-8.7
ZINC000072325291	-8.7
ZINC000096834554	-8.7
ZINC000217689178	-8.7
ZINC000263585734	-8.7
ZINC000000029936	-8.6
ZINC000000030016	-8.6
ZINC000000030032	-8.6
ZINC000000030767	-8.6
ZINC000000041471	-8.6
ZINC000000043912	-8.6
ZINC000000051478	-8.6
ZINC000000058775	-8.6
ZINC000000067887	-8.6
ZINC000000085855	-8.6
ZINC000000117038	-8.6
ZINC000000117941	-8.6
ZINC000000121705	-8.6
ZINC000000168970	-8.6
ZINC000000176897	-8.6
ZINC000000195406	-8.6
ZINC000000200919	-8.6
ZINC000000204260	-8.6
ZINC000000253114	-8.6
ZINC000000257787	-8.6
ZINC000000265221	-8.6
ZINC000000271688	-8.6
ZINC000000301757	-8.6
ZINC000000339819	-8.6
ZINC000000434716	-8.6
ZINC000000456872	-8.6
ZINC000000457454	-8.6
ZINC000000457522	-8.6
ZINC000000486262	-8.6
ZINC000000525729	-8.6
ZINC000000528977	-8.6
ZINC000000626132	-8.6
ZINC000000645771	-8.6
ZINC000000851757	-8.6
ZINC000000851758	-8.6
ZINC000000870600	-8.6
ZINC000000952696	-8.6
ZINC000000970804	-8.6
ZINC000000996226	-8.6
ZINC000001183226	-8.6
ZINC000001318428	-8.6
ZINC000001383820	-8.6
ZINC000001459963	-8.6
ZINC000001593750	-8.6
ZINC000001735630	-8.6
ZINC000001782740	-8.6
ZINC000001782741	-8.6
ZINC000001831993	-8.6
ZINC000002097402	-8.6
ZINC000002105433	-8.6
ZINC000002112713	-8.6
ZINC000002147553	-8.6
ZINC000002223843	-8.6
ZINC000002534555	-8.6
ZINC000002721476	-8.6
ZINC000002723188	-8.6
ZINC000002851302	-8.6
ZINC000002864603	-8.6
ZINC000002927614	-8.6
ZINC000002998809	-8.6
ZINC000003048761	-8.6
ZINC000003908306	-8.6
ZINC000003958696	-8.6
ZINC000004028110	-8.6
ZINC000004173627	-8.6
ZINC000004178476	-8.6
ZINC000004409962	-8.6
ZINC000004487694	-8.6
ZINC000004550514	-8.6
ZINC000004661567	-8.6
ZINC000004710854	-8.6
ZINC000004743330	-8.6
ZINC000004743646	-8.6
ZINC000004880450	-8.6
ZINC000004880505	-8.6
ZINC000004881007	-8.6
ZINC000004933305	-8.6
ZINC000005163216	-8.6
ZINC000005347406	-8.6
ZINC000005782792	-8.6
ZINC000006122773	-8.6
ZINC000006624119	-8.6
ZINC000006624204	-8.6
ZINC000006658756	-8.6
ZINC000006658757	-8.6
ZINC000006700718	-8.6
ZINC000006736823	-8.6
ZINC000006767083	-8.6
ZINC000006875695	-8.6
ZINC000006946433	-8.6
ZINC000006947183	-8.6
ZINC000008276825	-8.6
ZINC000008765080	-8.6
ZINC000008765339	-8.6
ZINC000008843814	-8.6
ZINC000008879403	-8.6
ZINC000008916953	-8.6
ZINC000009135062	-8.6
ZINC000009379650	-8.6
ZINC000009532029	-8.6
ZINC000010434758	-8.6
ZINC000012063019	-8.6
ZINC000012296850	-8.6
ZINC000012895299	-8.6
ZINC000012901690	-8.6
ZINC000015721882	-8.6
ZINC000016753972	-8.6
ZINC000016985268	-8.6
ZINC000019872542	-8.6
ZINC000019897822	-8.6
ZINC000019897885	-8.6
ZINC000019897919	-8.6
ZINC000020745249	-8.6
ZINC000021911910	-8.6
ZINC000027664000	-8.6
ZINC000027667629	-8.6
ZINC000027667710	-8.6
ZINC000028288167	-8.6
ZINC000032123824	-8.6
ZINC000032124514	-8.6
ZINC000036369810	-8.6
ZINC000036370039	-8.6
ZINC000040310026	-8.6
ZINC000042228347	-8.6
ZINC000056452575	-8.6
ZINC000060349748	-8.6
ZINC000064678933	-8.6
ZINC000065248720	-8.6
ZINC000065248827	-8.6
ZINC000065248888	-8.6
ZINC000070666587	-8.6
ZINC000072324739	-8.6
ZINC000072324913	-8.6
ZINC000072325588	-8.6
ZINC000075550723	-8.6
ZINC000079190538	-8.6
ZINC000079192767	-8.6
ZINC000082138167	-8.6
ZINC000085876933	-8.6
ZINC000085877063	-8.6
ZINC000085879196	-8.6
ZINC000096115712	-8.6
ZINC000096222339	-8.6
ZINC000000050301	-8.5
ZINC000000058774	-8.5
ZINC000000060717	-8.5
ZINC000000075055	-8.5
ZINC000000077540	-8.5
ZINC000000077856	-8.5
ZINC000000084013	-8.5
ZINC000000139058	-8.5
ZINC000000139294	-8.5
ZINC000000176701	-8.5
ZINC000000181785	-8.5
ZINC000000183870	-8.5
ZINC000000184586	-8.5
ZINC000000189406	-8.5
ZINC000000203256	-8.5
ZINC000000213716	-8.5
ZINC000000224861	-8.5
ZINC000000253015	-8.5
ZINC000000253439	-8.5
ZINC000000265224	-8.5
ZINC000000268344	-8.5
ZINC000000273797	-8.5
ZINC000000288369	-8.5
ZINC000000294101	-8.5
ZINC000000294730	-8.5
ZINC000000303635	-8.5
ZINC000000312499	-8.5
ZINC000000349992	-8.5
ZINC000000362092	-8.5
ZINC000000437169	-8.5
ZINC000000457423	-8.5
ZINC000000457518	-8.5
ZINC000000465744	-8.5
ZINC000000466407	-8.5
ZINC000000487469	-8.5
ZINC000000489005	-8.5
ZINC000000489425	-8.5
ZINC000000526252	-8.5
ZINC000000626395	-8.5
ZINC000000645844	-8.5
ZINC000000646122	-8.5
ZINC000000662309	-8.5
ZINC000000674222	-8.5
ZINC000000790598	-8.5
ZINC000000798517	-8.5
ZINC000000811628	-8.5
ZINC000000811636	-8.5
ZINC000000824756	-8.5
ZINC000000851803	-8.5
ZINC000000860277	-8.5
ZINC000000872109	-8.5
ZINC000000900119	-8.5
ZINC000000947080	-8.5
ZINC000000978483	-8.5
ZINC000000978484	-8.5
ZINC000001115949	-8.5
ZINC000001140988	-8.5
ZINC000001182734	-8.5
ZINC000001189611	-8.5
ZINC000001470745	-8.5
ZINC000001615443	-8.5
ZINC000001730671	-8.5
ZINC000002188662	-8.5
ZINC000002380258	-8.5
ZINC000002748138	-8.5
ZINC000002882062	-8.5
ZINC000002927573	-8.5
ZINC000004000394	-8.5
ZINC000004028582	-8.5
ZINC000004042308	-8.5
ZINC000004084926	-8.5
ZINC000004090069	-8.5
ZINC000004112273	-8.5
ZINC000004166988	-8.5
ZINC000004171961	-8.5
ZINC000004487679	-8.5
ZINC000004487689	-8.5
ZINC000004526333	-8.5
ZINC000004553148	-8.5
ZINC000005034278	-8.5
ZINC000005157014	-8.5
ZINC000005221403	-8.5
ZINC000005345416	-8.5
ZINC000006659337	-8.5
ZINC000006661639	-8.5
ZINC000006702896	-8.5
ZINC000006767783	-8.5
ZINC000008134493	-8.5
ZINC000008490996	-8.5
ZINC000008764452	-8.5
ZINC000008764735	-8.5
ZINC000008764927	-8.5
ZINC000008878835	-8.5
ZINC000008879751	-8.5
ZINC000008997482	-8.5
ZINC000009215973	-8.5
ZINC000009224897	-8.5
ZINC000010272773	-8.5
ZINC000010816916	-8.5
ZINC000012062833	-8.5
ZINC000012248578	-8.5
ZINC000012296515	-8.5
ZINC000012861531	-8.5
ZINC000012893479	-8.5
ZINC000013570997	-8.5
ZINC000013625485	-8.5
ZINC000015423506	-8.5
ZINC000015627354	-8.5
ZINC000015721884	-8.5
ZINC000017911520	-8.5
ZINC000017911521	-8.5
ZINC000018157712	-8.5
ZINC000019553150	-8.5
ZINC000019897816	-8.5
ZINC000019897817	-8.5
ZINC000019897829	-8.5
ZINC000020394211	-8.5
ZINC000020427677	-8.5
ZINC000020622823	-8.5
ZINC000020761399	-8.5
ZINC000020761521	-8.5
ZINC000020762095	-8.5
ZINC000020763527	-8.5
ZINC000021114899	-8.5
ZINC000021798703	-8.5
ZINC000021798708	-8.5
ZINC000021911945	-8.5
ZINC000022468380	-8.5
ZINC000023142442	-8.5
ZINC000023142687	-8.5
ZINC000023973405	-8.5
ZINC000023973569	-8.5
ZINC000027581500	-8.5
ZINC000027746398	-8.5
ZINC000027749423	-8.5
ZINC000031035874	-8.5
ZINC000032123933	-8.5
ZINC000034651227	-8.5
ZINC000035514688	-8.5
ZINC000036369806	-8.5
ZINC000038031717	-8.5
ZINC000038746550	-8.5
ZINC000040309257	-8.5
ZINC000040309887	-8.5
ZINC000040313090	-8.5
ZINC000041146468	-8.5
ZINC000045293480	-8.5
ZINC000048935555	-8.5
ZINC000049409974	-8.5
ZINC000065248715	-8.5
ZINC000065248724	-8.5
ZINC000065248889	-8.5
ZINC000072324623	-8.5
ZINC000072325058	-8.5
ZINC000075437297	-8.5
ZINC000079191880	-8.5
ZINC000085877114	-8.5
ZINC000096114044	-8.5
ZINC000096116085	-8.5
ZINC000096222257	-8.5
ZINC000217919859	-8.5
ZINC000000036558	-8.4
ZINC000000042677	-8.4
ZINC000000044431	-8.4
ZINC000000051062	-8.4
ZINC000000057384	-8.4
ZINC000000064870	-8.4
ZINC000000067922	-8.4
ZINC000000077299	-8.4
ZINC000000077536	-8.4
ZINC000000104210	-8.4
ZINC000000121711	-8.4
ZINC000000128221	-8.4
ZINC000000128823	-8.4
ZINC000000129501	-8.4
ZINC000000130061	-8.4
ZINC000000139291	-8.4
ZINC000000184993	-8.4
ZINC000000205891	-8.4
ZINC000000208127	-8.4
ZINC000000212481	-8.4
ZINC000000212487	-8.4
ZINC000000258674	-8.4
ZINC000000260264	-8.4
ZINC000000265220	-8.4
ZINC000000285367	-8.4
ZINC000000319492	-8.4
ZINC000000319500	-8.4
ZINC000000381091	-8.4
ZINC000000443952	-8.4
ZINC000000445020	-8.4
ZINC000000466323	-8.4
ZINC000000477778	-8.4
ZINC000000487729	-8.4
ZINC000000567111	-8.4
ZINC000000626451	-8.4
ZINC000000661173	-8.4
ZINC000000818842	-8.4
ZINC000000824757	-8.4
ZINC000000851787	-8.4
ZINC000000859108	-8.4
ZINC000000860141	-8.4
ZINC000000893185	-8.4
ZINC000000947087	-8.4
ZINC000000947828	-8.4
ZINC000000951037	-8.4
ZINC000001025950	-8.4
ZINC000001061484	-8.4
ZINC000001140301	-8.4
ZINC000001168913	-8.4
ZINC000001388104	-8.4
ZINC000001750408	-8.4
ZINC000001770388	-8.4
ZINC000001848107	-8.4
ZINC000001857016	-8.4
ZINC000002097661	-8.4
ZINC000002118094	-8.4
ZINC000002149920	-8.4
ZINC000002149921	-8.4
ZINC000002225665	-8.4
ZINC000002332533	-8.4
ZINC000002464235	-8.4
ZINC000002708394	-8.4
ZINC000002774536	-8.4
ZINC000003061940	-8.4
ZINC000003897007	-8.4
ZINC000004023847	-8.4
ZINC000004089576	-8.4
ZINC000004166992	-8.4
ZINC000004353955	-8.4
ZINC000004472972	-8.4
ZINC000004487666	-8.4
ZINC000004487683	-8.4
ZINC000004731619	-8.4
ZINC000004743677	-8.4
ZINC000004821016	-8.4
ZINC000004933096	-8.4
ZINC000004992595	-8.4
ZINC000005205909	-8.4
ZINC000005208042	-8.4
ZINC000005217324	-8.4
ZINC000005267760	-8.4
ZINC000005960296	-8.4
ZINC000006660113	-8.4
ZINC000006662507	-8.4
ZINC000006760505	-8.4
ZINC000006917892	-8.4
ZINC000006917932	-8.4
ZINC000006946530	-8.4
ZINC000006947166	-8.4
ZINC000008487863	-8.4
ZINC000008613760	-8.4
ZINC000008613762	-8.4
ZINC000008765053	-8.4
ZINC000008783043	-8.4
ZINC000008843813	-8.4
ZINC000008916954	-8.4
ZINC000008917445	-8.4
ZINC000008917446	-8.4
ZINC000008990766	-8.4
ZINC000010146608	-8.4
ZINC000011865976	-8.4
ZINC000012296516	-8.4
ZINC000012321316	-8.4
ZINC000012896650	-8.4
ZINC000013557241	-8.4
ZINC000014987932	-8.4
ZINC000015721829	-8.4
ZINC000016626252	-8.4
ZINC000016753975	-8.4
ZINC000017911473	-8.4
ZINC000018203176	-8.4
ZINC000019720438	-8.4
ZINC000019840628	-8.4
ZINC000019897830	-8.4
ZINC000020721992	-8.4
ZINC000021095335	-8.4
ZINC000021095374	-8.4
ZINC000021168734	-8.4
ZINC000021883190	-8.4
ZINC000021911941	-8.4
ZINC000022468162	-8.4
ZINC000023973401	-8.4
ZINC000031948984	-8.4
ZINC000038516596	-8.4
ZINC000040308996	-8.4
ZINC000040310012	-8.4
ZINC000040312711	-8.4
ZINC000040313312	-8.4
ZINC000049679127	-8.4
ZINC000057419992	-8.4
ZINC000065248698	-8.4
ZINC000065248834	-8.4
ZINC000070666507	-8.4
ZINC000072326064	-8.4
ZINC000075437380	-8.4
ZINC000079189063	-8.4
ZINC000079190036	-8.4
ZINC000095348656	-8.4
ZINC000100305206	-8.4
ZINC000191005053	-8.4
ZINC000230209518	-8.4
ZINC000253401654	-8.4
ZINC000000029649	-8.3
ZINC000000029950	-8.3
ZINC000000037033	-8.3
ZINC000000053904	-8.3
ZINC000000093238	-8.3
ZINC000000128782	-8.3
ZINC000000133071	-8.3
ZINC000000149855	-8.3
ZINC000000167142	-8.3
ZINC000000194222	-8.3
ZINC000000199656	-8.3
ZINC000000210345	-8.3
ZINC000000235875	-8.3
ZINC000000258573	-8.3
ZINC000000261828	-8.3
ZINC000000270124	-8.3
ZINC000000274151	-8.3
ZINC000000290995	-8.3
ZINC000000303107	-8.3
ZINC000000318757	-8.3
ZINC000000372650	-8.3
ZINC000000394916	-8.3
ZINC000000430322	-8.3
ZINC000000433183	-8.3
ZINC000000459526	-8.3
ZINC000000526619	-8.3
ZINC000000641902	-8.3
ZINC000000780272	-8.3
ZINC000000782969	-8.3
ZINC000000799393	-8.3
ZINC000000815175	-8.3
ZINC000000818841	-8.3
ZINC000000850431	-8.3
ZINC000000860155	-8.3
ZINC000000890176	-8.3
ZINC000000947079	-8.3
ZINC000000947759	-8.3
ZINC000001009415	-8.3
ZINC000001230614	-8.3
ZINC000001750389	-8.3
ZINC000001750406	-8.3
ZINC000001771928	-8.3
ZINC000002087287	-8.3
ZINC000002130508	-8.3
ZINC000002145303	-8.3
ZINC000002219639	-8.3
ZINC000002317234	-8.3
ZINC000002340369	-8.3
ZINC000002430871	-8.3
ZINC000002432176	-8.3
ZINC000002743379	-8.3
ZINC000002811830	-8.3
ZINC000002864579	-8.3
ZINC000002870023	-8.3
ZINC000002874610	-8.3
ZINC000002898724	-8.3
ZINC000002902000	-8.3
ZINC000002927518	-8.3
ZINC000003089782	-8.3
ZINC000003155965	-8.3
ZINC000003662054	-8.3
ZINC000003900165	-8.3
ZINC000004000290	-8.3
ZINC000004018828	-8.3
ZINC000004087671	-8.3
ZINC000004487681	-8.3
ZINC000004731668	-8.3
ZINC000004740664	-8.3
ZINC000004814474	-8.3
ZINC000005034246	-8.3
ZINC000005184903	-8.3
ZINC000005307695	-8.3
ZINC000005388414	-8.3
ZINC000006670403	-8.3
ZINC000006677896	-8.3
ZINC000006736847	-8.3
ZINC000006751102	-8.3
ZINC000006759497	-8.3
ZINC000006917981	-8.3
ZINC000006942858	-8.3
ZINC000006945838	-8.3
ZINC000007000021	-8.3
ZINC000008014216	-8.3
ZINC000008014217	-8.3
ZINC000008764462	-8.3
ZINC000008764617	-8.3
ZINC000008764971	-8.3
ZINC000008869946	-8.3
ZINC000010434760	-8.3
ZINC000011605144	-8.3
ZINC000012377443	-8.3
ZINC000012383591	-8.3
ZINC000012428191	-8.3
ZINC000012894114	-8.3
ZINC000012897764	-8.3
ZINC000013722995	-8.3
ZINC000015424180	-8.3
ZINC000017064889	-8.3
ZINC000017911474	-8.3
ZINC000017917305	-8.3
ZINC000019787114	-8.3
ZINC000019804924	-8.3
ZINC000019897819	-8.3
ZINC000019897823	-8.3
ZINC000020412441	-8.3
ZINC000020610098	-8.3
ZINC000021911904	-8.3
ZINC000021911908	-8.3
ZINC000022468121	-8.3
ZINC000022468127	-8.3
ZINC000022468146	-8.3
ZINC000022468168	-8.3
ZINC000027662042	-8.3
ZINC000027662051	-8.3
ZINC000032124448	-8.3
ZINC000032540773	-8.3
ZINC000034191060	-8.3
ZINC000036369838	-8.3
ZINC000036370067	-8.3
ZINC000040309834	-8.3
ZINC000040309961	-8.3
ZINC000040312529	-8.3
ZINC000040312934	-8.3
ZINC000049537251	-8.3
ZINC000049543307	-8.3
ZINC000057419423	-8.3
ZINC000062001350	-8.3
ZINC000062001514	-8.3
ZINC000064677353	-8.3
ZINC000065248684	-8.3
ZINC000065248706	-8.3
ZINC000065248723	-8.3
ZINC000072326107	-8.3
ZINC000079189062	-8.3
ZINC000085879126	-8.3
ZINC000096113786	-8.3
ZINC000000029927	-8.2
ZINC000000030555	-8.2
ZINC000000044432	-8.2
ZINC000000049207	-8.2
ZINC000000056772	-8.2
ZINC000000066503	-8.2
ZINC000000073848	-8.2
ZINC000000101578	-8.2
ZINC000000104215	-8.2
ZINC000000121785	-8.2
ZINC000000150904	-8.2
ZINC000000162989	-8.2
ZINC000000163007	-8.2
ZINC000000168652	-8.2
ZINC000000182173	-8.2
ZINC000000183254	-8.2
ZINC000000183691	-8.2
ZINC000000183903	-8.2
ZINC000000210701	-8.2
ZINC000000212473	-8.2
ZINC000000224876	-8.2
ZINC000000225001	-8.2
ZINC000000246205	-8.2
ZINC000000258631	-8.2
ZINC000000258917	-8.2
ZINC000000261835	-8.2
ZINC000000265222	-8.2
ZINC000000284207	-8.2
ZINC000000288797	-8.2
ZINC000000302919	-8.2
ZINC000000303350	-8.2
ZINC000000303763	-8.2
ZINC000000309702	-8.2
ZINC000000355379	-8.2
ZINC000000362418	-8.2
ZINC000000405248	-8.2
ZINC000000455859	-8.2
ZINC000000464304	-8.2
ZINC000000465410	-8.2
ZINC000000470065	-8.2
ZINC000000480433	-8.2
ZINC000000725196	-8.2
ZINC000000778542	-8.2
ZINC000000779530	-8.2
ZINC000000790601	-8.2
ZINC000000872105	-8.2
ZINC000000892812	-8.2
ZINC000000953723	-8.2
ZINC000001079435	-8.2
ZINC000001130217	-8.2
ZINC000001132058	-8.2
ZINC000001453822	-8.2
ZINC000001457091	-8.2
ZINC000001687151	-8.2
ZINC000001770383	-8.2
ZINC000002075614	-8.2
ZINC000002145307	-8.2
ZINC000002156214	-8.2
ZINC000002213629	-8.2
ZINC000002261576	-8.2
ZINC000002380264	-8.2
ZINC000002436783	-8.2
ZINC000002528942	-8.2
ZINC000002854745	-8.2
ZINC000002860321	-8.2
ZINC000002927574	-8.2
ZINC000002989963	-8.2
ZINC000003041159	-8.2
ZINC000003061941	-8.2
ZINC000003117431	-8.2
ZINC000003614799	-8.2
ZINC000004062163	-8.2
ZINC000004084526	-8.2
ZINC000004084527	-8.2
ZINC000004121118	-8.2
ZINC000004122329	-8.2
ZINC000004487668	-8.2
ZINC000004539378	-8.2
ZINC000004673412	-8.2
ZINC000004728143	-8.2
ZINC000004740655	-8.2
ZINC000005378112	-8.2
ZINC000005378372	-8.2
ZINC000005395036	-8.2
ZINC000006623988	-8.2
ZINC000006659778	-8.2
ZINC000006751943	-8.2
ZINC000006766260	-8.2
ZINC000006917925	-8.2
ZINC000006920168	-8.2
ZINC000006947018	-8.2
ZINC000006947229	-8.2
ZINC000008490995	-8.2
ZINC000008739328	-8.2
ZINC000008764771	-8.2
ZINC000008765042	-8.2
ZINC000008782368	-8.2
ZINC000008879429	-8.2
ZINC000008916957	-8.2
ZINC000011916604	-8.2
ZINC000012296847	-8.2
ZINC000012296848	-8.2
ZINC000012296849	-8.2
ZINC000012371690	-8.2
ZINC000016029211	-8.2
ZINC000017440578	-8.2
ZINC000017845831	-8.2
ZINC000019735183	-8.2
ZINC000019897831	-8.2
ZINC000020547507	-8.2
ZINC000027581507	-8.2
ZINC000031775768	-8.2
ZINC000032124097	-8.2
ZINC000032801113	-8.2
ZINC000035485066	-8.2
ZINC000040309299	-8.2
ZINC000040313233	-8.2
ZINC000062001442	-8.2
ZINC000062005039	-8.2
ZINC000065248828	-8.2
ZINC000070666242	-8.2
ZINC000070666459	-8.2
ZINC000072326109	-8.2
ZINC000072326144	-8.2
ZINC000082138161	-8.2
ZINC000085875063	-8.2
ZINC000096115940	-8.2
ZINC000096221279	-8.2
ZINC000101453177	-8.2
ZINC000218085683	-8.2
ZINC000253412588	-8.2
ZINC000257199044	-8.2
ZINC000000029911	-8.1
ZINC000000030012	-8.1
ZINC000000047661	-8.1
ZINC000000049465	-8.1
ZINC000000051061	-8.1
ZINC000000056758	-8.1
ZINC000000056773	-8.1
ZINC000000069962	-8.1
ZINC000000087123	-8.1
ZINC000000128522	-8.1
ZINC000000128748	-8.1
ZINC000000149852	-8.1
ZINC000000188569	-8.1
ZINC000000189099	-8.1
ZINC000000206445	-8.1
ZINC000000262522	-8.1
ZINC000000284204	-8.1
ZINC000000289917	-8.1
ZINC000000303757	-8.1
ZINC000000303913	-8.1
ZINC000000305336	-8.1
ZINC000000397608	-8.1
ZINC000000445415	-8.1
ZINC000000467045	-8.1
ZINC000000780273	-8.1
ZINC000000860140	-8.1
ZINC000001049568	-8.1
ZINC000001083472	-8.1
ZINC000001181215	-8.1
ZINC000001507126	-8.1
ZINC000001793738	-8.1
ZINC000002063830	-8.1
ZINC000002102995	-8.1
ZINC000002139078	-8.1
ZINC000002140474	-8.1
ZINC000002484265	-8.1
ZINC000002494787	-8.1
ZINC000002571595	-8.1
ZINC000002834826	-8.1
ZINC000002860352	-8.1
ZINC000002864574	-8.1
ZINC000002864653	-8.1
ZINC000002870070	-8.1
ZINC000002899145	-8.1
ZINC000002901550	-8.1
ZINC000002901768	-8.1
ZINC000002910499	-8.1
ZINC000002927581	-8.1
ZINC000002991806	-8.1
ZINC000003038242	-8.1
ZINC000003061942	-8.1
ZINC000003623313	-8.1
ZINC000003898361	-8.1
ZINC000004122343	-8.1
ZINC000004268957	-8.1
ZINC000004342707	-8.1
ZINC000004342713	-8.1
ZINC000004671965	-8.1
ZINC000004680889	-8.1
ZINC000004703143	-8.1
ZINC000004740656	-8.1
ZINC000005005844	-8.1
ZINC000005034242	-8.1
ZINC000005034266	-8.1
ZINC000005141081	-8.1
ZINC000005217329	-8.1
ZINC000006624197	-8.1
ZINC000006760482	-8.1
ZINC000006760720	-8.1
ZINC000006917884	-8.1
ZINC000006917923	-8.1
ZINC000007006538	-8.1
ZINC000008135953	-8.1
ZINC000008764993	-8.1
ZINC000008916956	-8.1
ZINC000009846970	-8.1
ZINC000011535882	-8.1
ZINC000011916602	-8.1
ZINC000012391442	-8.1
ZINC000012896637	-8.1
ZINC000012901525	-8.1
ZINC000014153647	-8.1
ZINC000015083701	-8.1
ZINC000016985258	-8.1
ZINC000016985471	-8.1
ZINC000017911463	-8.1
ZINC000017911475	-8.1
ZINC000017911522	-8.1
ZINC000018266194	-8.1
ZINC000019210273	-8.1
ZINC000019537586	-8.1
ZINC000019720612	-8.1
ZINC000019897886	-8.1
ZINC000019897920	-8.1
ZINC000019902225	-8.1
ZINC000020889877	-8.1
ZINC000022468174	-8.1
ZINC000032123846	-8.1
ZINC000033422042	-8.1
ZINC000048375995	-8.1
ZINC000060349754	-8.1
ZINC000062001786	-8.1
ZINC000062001856	-8.1
ZINC000065248700	-8.1
ZINC000065248739	-8.1
ZINC000070666405	-8.1
ZINC000072326103	-8.1
ZINC000072326105	-8.1
ZINC000075157255	-8.1
ZINC000075157256	-8.1
ZINC000080790821	-8.1
ZINC000095473130	-8.1
ZINC000096115459	-8.1
ZINC000096116098	-8.1
ZINC000100793085	-8.1
ZINC000136774179	-8.1
ZINC000000030164	-8
ZINC000000036001	-8
ZINC000000036021	-8
ZINC000000036037	-8
ZINC000000037223	-8
ZINC000000037563	-8
ZINC000000042341	-8
ZINC000000047229	-8
ZINC000000047682	-8
ZINC000000063712	-8
ZINC000000067874	-8
ZINC000000101633	-8
ZINC000000104829	-8
ZINC000000121330	-8
ZINC000000121782	-8
ZINC000000127857	-8
ZINC000000128498	-8
ZINC000000128609	-8
ZINC000000128785	-8
ZINC000000138238	-8
ZINC000000167151	-8
ZINC000000168547	-8
ZINC000000183749	-8
ZINC000000185016	-8
ZINC000000200703	-8
ZINC000000252998	-8
ZINC000000258186	-8
ZINC000000258922	-8
ZINC000000262537	-8
ZINC000000263668	-8
ZINC000000284203	-8
ZINC000000299151	-8
ZINC000000299894	-8
ZINC000000303500	-8
ZINC000000308309	-8
ZINC000000311644	-8
ZINC000000319495	-8
ZINC000000362420	-8
ZINC000000409120	-8
ZINC000000410077	-8
ZINC000000779539	-8
ZINC000000860279	-8
ZINC000001005761	-8
ZINC000001057741	-8
ZINC000001097941	-8
ZINC000001137359	-8
ZINC000001156429	-8
ZINC000001230435	-8
ZINC000001428654	-8
ZINC000001635386	-8
ZINC000001813389	-8
ZINC000001851949	-8
ZINC000002103800	-8
ZINC000002120887	-8
ZINC000002156211	-8
ZINC000002158507	-8
ZINC000002159892	-8
ZINC000002181414	-8
ZINC000002188661	-8
ZINC000002388692	-8
ZINC000002578310	-8
ZINC000002610313	-8
ZINC000002847015	-8
ZINC000002851931	-8
ZINC000002855315	-8
ZINC000002860372	-8
ZINC000002864573	-8
ZINC000002864695	-8
ZINC000002864713	-8
ZINC000002864762	-8
ZINC000002899147	-8
ZINC000002927523	-8
ZINC000002927575	-8
ZINC000002940408	-8
ZINC000002986345	-8
ZINC000003059315	-8
ZINC000003059318	-8
ZINC000003832542	-8
ZINC000004340571	-8
ZINC000004340572	-8
ZINC000004342695	-8
ZINC000004342709	-8
ZINC000004573103	-8
ZINC000004590889	-8
ZINC000004740610	-8
ZINC000004762374	-8
ZINC000005063606	-8
ZINC000005346677	-8
ZINC000006668550	-8
ZINC000006728901	-8
ZINC000006917970	-8
ZINC000008410672	-8
ZINC000008666593	-8
ZINC000008765081	-8
ZINC000012062768	-8
ZINC000012446800	-8
ZINC000012896032	-8
ZINC000016850760	-8
ZINC000019237225	-8
ZINC000019565317	-8
ZINC000019595048	-8
ZINC000019606453	-8
ZINC000019606455	-8
ZINC000019797601	-8
ZINC000019897838	-8
ZINC000020547066	-8
ZINC000023081445	-8
ZINC000027580407	-8
ZINC000027793187	-8
ZINC000032124098	-8
ZINC000032124447	-8
ZINC000032657689	-8
ZINC000033171326	-8
ZINC000037432649	-8
ZINC000040309469	-8
ZINC000040312792	-8
ZINC000049420907	-8
ZINC000056452037	-8
ZINC000062001515	-8
ZINC000062001785	-8
ZINC000065248699	-8
ZINC000065248701	-8
ZINC000065248721	-8
ZINC000070666404	-8
ZINC000072324668	-8
ZINC000072325608	-8
ZINC000072325869	-8
ZINC000079196745	-8
ZINC000082138162	-8
ZINC000096114257	-8
ZINC000217595213	-8
ZINC000000026546	-7.9
ZINC000000029645	-7.9
ZINC000000029974	-7.9
ZINC000000030015	-7.9
ZINC000000037225	-7.9
ZINC000000037324	-7.9
ZINC000000042678	-7.9
ZINC000000052126	-7.9
ZINC000000057125	-7.9
ZINC000000057595	-7.9
ZINC000000070278	-7.9
ZINC000000071284	-7.9
ZINC000000073278	-7.9
ZINC000000091481	-7.9
ZINC000000116318	-7.9
ZINC000000121720	-7.9
ZINC000000121725	-7.9
ZINC000000121744	-7.9
ZINC000000138214	-7.9
ZINC000000172228	-7.9
ZINC000000182490	-7.9
ZINC000000182566	-7.9
ZINC000000187413	-7.9
ZINC000000193374	-7.9
ZINC000000193375	-7.9
ZINC000000195377	-7.9
ZINC000000195381	-7.9
ZINC000000210348	-7.9
ZINC000000213912	-7.9
ZINC000000239904	-7.9
ZINC000000273798	-7.9
ZINC000000284202	-7.9
ZINC000000289960	-7.9
ZINC000000293660	-7.9
ZINC000000294209	-7.9
ZINC000000303384	-7.9
ZINC000000314646	-7.9
ZINC000000331339	-7.9
ZINC000000434475	-7.9
ZINC000000445165	-7.9
ZINC000000640096	-7.9
ZINC000000859922	-7.9
ZINC000000860107	-7.9
ZINC000000942058	-7.9
ZINC000000946923	-7.9
ZINC000001088681	-7.9
ZINC000001774456	-7.9
ZINC000001774457	-7.9
ZINC000001774487	-7.9
ZINC000002096710	-7.9
ZINC000002097891	-7.9
ZINC000002097892	-7.9
ZINC000002124060	-7.9
ZINC000002137347	-7.9
ZINC000002181315	-7.9
ZINC000002217498	-7.9
ZINC000002332202	-7.9
ZINC000002481327	-7.9
ZINC000002780061	-7.9
ZINC000002790563	-7.9
ZINC000002869976	-7.9
ZINC000002883519	-7.9
[truncated: 1,094 more rows]

## Sheet: Suppl._Table_4
Supplementary table 4. Ensemble docking-basead virtual screening of 3,092 natural products on the nucleotide-binding pocket of EfAPH(3')-IIIa analyzed with rank by rank consensus method
Natural products	3Q2J		3TM0		2BKK		RbyR
ZINC000000952700	-10.1	3	-10.5	4	-10.6	3	3.33333
ZINC000014793040	-9.9	6	-10.4	5	-10.7	2	4.33333
ZINC000015498603	-9.8	10	-11.1	1	-10.2	13	8
ZINC000002995638	-9.8	11	-10.2	10	-10.3	8	9.66667
ZINC000031205183	-10.1	2	-10.1	19	-10	22	14.3333
ZINC000000649629	-10.2	1	-10	35	-10	21	19
ZINC000001193126	-9.5	26	-10	36	-10.3	9	23.6667
ZINC000004081983	-9.3	59	-11.1	2	-10	25	28.6667
ZINC000065248687	-9.9	8	-10.1	21	-9.7	63	30.6667
ZINC000062001304	-9.9	9	-9.7	75	-10.1	16	33.3333
ZINC000031034672	-10.1	4	-9.8	54	-9.8	48	35.3333
ZINC000054219980	-10	5	-9.7	74	-9.9	30	36.3333
ZINC000002295637	-9.2	78	-10.3	9	-9.9	32	39.6667
ZINC000000062430	-9.7	18	-9.7	77	-9.9	31	42
ZINC000033267221	-9.2	83	-10	39	-10.5	5	42.3333
ZINC000000036029	-9.5	28	-9.8	55	-9.8	50	44.3333
ZINC000007646291	-9.4	43	-9.7	78	-10.1	17	46
ZINC000000629674	-9.1	109	-10.2	13	-10.1	18	46.6667
ZINC000253395576	-9.5	32	-9.6	107	-10.4	6	48.3333
ZINC000013593433	-9.3	60	-10.1	22	-9.7	65	49
ZINC000015616332	-9.3	61	-10.1	23	-9.7	66	50
ZINC000005186286	-9.2	82	-10	38	-9.9	33	51
ZINC000012296832	-9.1	111	-10.1	26	-9.9	36	57.6667
ZINC000031205304	-9.9	7	-10.1	20	-9.4	162	63
ZINC000253395575	-9.1	119	-9.8	61	-10.3	10	63.3333
ZINC000001181775	-9.2	84	-9.9	46	-9.7	67	65.6667
ZINC000017295613	-9.2	81	-10.1	25	-9.6	96	67.3333
ZINC000001081655	-9.2	85	-9.8	57	-9.7	68	70
ZINC000075155689	-9.1	121	-9.7	80	-10.1	19	73.3333
ZINC000008764432	-9.5	29	-9.6	104	-9.6	91	74.6667
ZINC000005186283	-9.1	118	-9.8	60	-9.8	52	76.6667
ZINC000000705352	-9.1	114	-9.9	47	-9.7	71	77.3333
ZINC000000361920	-9.5	33	-9.5	141	-9.7	64	79.3333
ZINC000008765057	-9.2	86	-9.8	58	-9.6	97	80.3333
ZINC000018074516	-9.2	87	-9.8	59	-9.6	98	81.3333
ZINC000010691968	-9.8	12	-10.2	11	-9.3	227	83.3333
ZINC000062001380	-9.8	13	-9.7	76	-9.4	163	84
ZINC000000299218	-9.1	120	-9.7	79	-9.8	53	84
ZINC000005265775	-9.1	116	-9.9	49	-9.6	99	88
ZINC000004325593	-9.3	63	-9.6	109	-9.6	95	89
ZINC000000497416	-9.5	34	-9.5	142	-9.6	92	89.3333
ZINC000062001419	-9.1	113	-10.1	28	-9.5	129	90
ZINC000004743727	-9.5	35	-9.5	143	-9.6	93	90.3333
ZINC000013593437	-9.1	108	-10.9	3	-9.4	174	95
ZINC000004941192	-9.4	46	-9.5	146	-9.6	94	95.3333
ZINC000032123832	-9.4	49	-9.3	239	-11.1	1	96.3333
ZINC000005186281	-9	170	-9.7	83	-9.9	38	97
ZINC000023573165	-9.1	117	-9.9	50	-9.5	130	99
ZINC000001774452	-9.3	65	-9.4	182	-9.8	51	99.3333
ZINC000032124125	-9.5	39	-9.3	238	-10	23	100
ZINC000075155690	-9.1	122	-9.7	81	-9.6	100	101
ZINC000000945277	-9.1	123	-9.6	111	-9.7	72	102
ZINC000020761909	-9.2	89	-9.5	148	-9.7	69	102
ZINC000001000138	-9.2	90	-9.4	183	-9.9	34	102.333
ZINC000017295740	-9.2	92	-9.4	185	-9.9	35	104
ZINC000017295598	-9.2	77	-10.4	6	-9.3	232	105
ZINC000018074517	-8.9	204	-10.4	7	-9.6	105	105.333
ZINC000000715403	-9.7	19	-9.5	140	-9.4	165	108
ZINC000065248705	-8.8	280	-10.4	8	-9.9	40	109.333
ZINC000012900631	-9.1	130	-9.5	151	-9.8	54	111.667
ZINC000017845496	-9.3	64	-9.5	147	-9.5	126	112.333
ZINC000000940123	-9.1	115	-9.9	48	-9.4	175	112.667
ZINC000007309056	-9.1	125	-9.6	113	-9.6	101	113
ZINC000003070964	-9.6	21	-9.3	237	-9.6	90	116
ZINC000006659873	-9.4	47	-9.4	180	-9.5	125	117.333
ZINC000000082459	-9.4	45	-9.5	145	-9.4	168	119.333
ZINC000010692210	-9.1	110	-10.2	14	-9.3	235	119.667
ZINC000023573167	-9	167	-10.2	15	-9.4	177	119.667
ZINC000006285205	-9.1	136	-9.4	189	-9.9	37	120.667
ZINC000002313470	-9	168	-9.8	62	-9.5	134	121.333
ZINC000040309443	-9.1	112	-10.1	27	-9.3	236	125
ZINC000000547223	-8.9	208	-9.8	63	-9.6	106	125.667
ZINC000032124479	-9.6	22	-9.2	310	-9.8	49	127
ZINC000000895394	-8.8	284	-9.7	86	-10.3	11	127
ZINC000000037387	-9.5	37	-9.4	178	-9.4	167	127.333
ZINC000085879798	-8.9	207	-10	41	-9.5	136	128
ZINC000008765056	-8.9	215	-9.5	156	-10.1	20	130.333
ZINC000010692217	-9.2	80	-10.1	24	-9.2	293	132.333
ZINC000004041573	-8.8	285	-9.7	87	-10	27	133
ZINC000008765013	-9.1	137	-9.4	190	-9.7	73	133.333
ZINC000009355767	-8.8	283	-9.8	66	-9.8	56	135
ZINC000020573540	-9	175	-9.4	193	-9.9	39	135.667
ZINC000012897137	-9.5	36	-9.5	144	-9.3	228	136
ZINC000005252569	-9.1	128	-9.5	149	-9.5	131	136
ZINC000008765505	-8.9	209	-9.8	64	-9.5	137	136.667
ZINC000002273547	-9.5	27	-10	37	-9.1	355	139.667
ZINC000005163649	-9.3	66	-9.3	240	-9.5	127	144.333
ZINC000004314925	-8.9	217	-9.4	196	-10	26	146.333
ZINC000062001396	-9.4	44	-9.6	108	-9.2	291	147.667
ZINC000005350310	-8.8	286	-9.7	88	-9.7	75	149.667
ZINC000040310053	-9.2	79	-10.2	12	-9.1	359	150
ZINC000000716751	-8.8	282	-9.8	65	-9.6	109	152
ZINC000170625415	-9.4	48	-9.4	181	-9.3	229	152.667
ZINC000009419002	-9.1	138	-9.4	191	-9.5	132	153.667
ZINC000019626257	-8.7	369	-9.9	52	-9.9	41	154
ZINC000040309014	-9	172	-9.6	117	-9.4	178	155.667
ZINC000006659844	-8.9	212	-9.6	118	-9.5	138	156
ZINC000015634187	-8.8	292	-9.6	125	-9.8	57	158
ZINC000027403539	-9.1	126	-9.6	114	-9.3	237	159
ZINC000000881318	-9.8	15	-9.4	176	-9.2	288	159.667
ZINC000008764386	-8.9	205	-10.1	29	-9.3	245	159.667
ZINC000000076861	-8.8	287	-9.6	120	-9.7	76	161
ZINC000010896238	-9.6	20	-9.4	177	-9.2	289	162
ZINC000072324929	-9.8	16	-9.2	309	-9.4	164	163
ZINC000065248829	-9.5	31	-9.6	106	-9.1	356	164.333
ZINC000056451756	-9.6	23	-9.2	311	-9.4	166	166.667
ZINC000079189191	-8.8	295	-9.6	128	-9.7	77	166.667
ZINC000065248714	-9.2	95	-9.3	243	-9.4	171	169.667
ZINC000100787891	-8.8	296	-9.5	157	-9.8	58	170.333
ZINC000036370093	-8.9	213	-9.6	119	-9.4	181	171
ZINC000001056954	-8.7	370	-9.8	67	-9.7	78	171.667
ZINC000000938341	-8.8	288	-9.6	121	-9.6	110	173
ZINC000005252582	-9.1	141	-9.3	246	-9.5	133	173.333
ZINC000062001634	-9.1	131	-9.5	152	-9.3	238	173.667
ZINC000096116164	-8.7	374	-9.7	91	-9.8	59	174.667
ZINC000012901074	-8.9	221	-9.4	200	-9.6	107	176
ZINC000011865977	-9	171	-9.6	116	-9.3	244	177
ZINC000095479167	-8.7	373	-9.7	90	-9.7	79	180.667
ZINC000008765014	-8.7	368	-10.1	31	-9.5	147	182
ZINC000018074512	-9.3	68	-9.2	314	-9.4	170	184
ZINC000012296920	-9.2	88	-9.6	110	-9.1	360	186
ZINC000065248813	-8.8	294	-9.6	127	-9.5	141	187.333
ZINC000062001410	-9.8	14	-9.6	103	-9	450	189
ZINC000000715423	-9.2	93	-9.3	241	-9.3	233	189
ZINC000001431982	-9.1	146	-9.2	320	-9.6	102	189.333
ZINC000006945956	-9.1	147	-9.2	321	-9.6	103	190.333
ZINC000008764377	-9.1	129	-9.5	150	-9.2	294	191
ZINC000000252937	-9	180	-9.2	325	-9.7	74	193
ZINC000072325780	-9.3	71	-9.1	390	-9.5	128	196.333
ZINC000000129483	-8.6	459	-9.7	93	-9.9	43	198.333
ZINC000004038781	-9.1	124	-9.6	112	-9.1	363	199.667
ZINC000010220491	-8.9	219	-9.4	198	-9.4	182	199.667
ZINC000055027966	-8.6	454	-10.1	32	-9.6	115	200.333
ZINC000005252578	-8.7	380	-9.5	161	-9.8	60	200.333
ZINC000011867273	-8.8	290	-9.6	123	-9.4	189	200.667
ZINC000072324441	-9.1	127	-9.6	115	-9.1	364	202
ZINC000002137292	-9.1	133	-9.4	186	-9.2	295	204.667
ZINC000000252965	-8.9	214	-9.5	155	-9.3	246	205
ZINC000005630934	-8.8	299	-9.4	205	-9.6	111	205
ZINC000027747024	-8.9	206	-10	40	-9.1	370	205.333
ZINC000000048259	-9.1	139	-9.3	244	-9.3	239	207.333
ZINC000096222528	-8.9	229	-9.3	256	-9.5	139	208
ZINC000000420319	-9.1	140	-9.3	245	-9.3	240	208.333
ZINC000096116500	-9.1	143	-9.3	248	-9.3	241	210.667
ZINC000022638023	-9	186	-9.1	396	-9.8	55	212.333
ZINC000065248704	-8.6	457	-9.8	70	-9.6	116	214.333
ZINC000040309212	-9.2	97	-9.2	317	-9.3	234	216
ZINC000032124460	-8.7	375	-9.6	129	-9.5	148	217.333
ZINC000072324968	-8.7	376	-9.6	130	-9.5	149	218.333
ZINC000013629969	-8.7	389	-9.3	262	-10.6	4	218.333
ZINC000000252950	-8.9	226	-9.3	253	-9.4	183	220.667
ZINC000007767413	-9	174	-9.4	192	-9.2	297	221
ZINC000004593481	-8.9	210	-9.7	84	-9.1	371	221.667
ZINC000012896067	-8.5	542	-9.7	96	-10	28	222
ZINC000070666358	-8.9	228	-9.3	255	-9.4	184	222.333
ZINC000036370094	-8.8	293	-9.6	126	-9.3	250	223
ZINC000000726166	-8.7	382	-9.4	209	-9.7	80	223.667
ZINC000009970585	-9.3	62	-9.8	56	-8.9	554	224
ZINC000012296790	-8.6	456	-9.8	69	-9.5	150	225
ZINC000006188551	-8.9	234	-9.2	333	-9.6	108	225
ZINC000004941191	-9	182	-9.2	327	-9.4	179	229.333
ZINC000000970801	-8.7	366	-10.2	16	-9.2	308	230
ZINC000065248826	-8.7	371	-9.8	68	-9.3	256	231.667
ZINC000003598909	-8.5	539	-9.8	71	-9.7	85	231.667
ZINC000016740609	-9.6	24	-9.1	388	-9.2	290	234
ZINC000003532863	-8.8	281	-9.9	51	-9.1	374	235.333
ZINC000001103131	-9.1	145	-9.2	319	-9.3	242	235.333
ZINC000001056072	-9	169	-9.7	82	-9	460	237
ZINC000019626261	-8.7	386	-9.4	213	-9.6	112	237
ZINC000008764227	-8.9	218	-9.4	197	-9.2	300	238.333
ZINC000013548665	-8.9	222	-9.4	201	-9.2	301	241.333
ZINC000036099418	-9	178	-9.3	250	-9.2	298	242
ZINC000004327979	-8.4	651	-10.1	33	-9.9	45	243
ZINC000013653561	-8.7	390	-9.3	263	-9.7	81	244.667
ZINC000012296791	-9.1	152	-9	480	-9.6	104	245.333
ZINC000008856458	-8.6	467	-9.4	216	-9.8	61	248
ZINC000000139406	-8.9	231	-9.2	330	-9.4	185	248.667
ZINC000001428710	-9.2	99	-9	479	-9.4	172	250
ZINC000005960258	-8.9	233	-9.2	332	-9.4	186	250.333
ZINC000012364222	-8.6	455	-10	42	-9.3	260	252.333
ZINC000072324966	-9.4	52	-9	478	-9.3	230	253.333
ZINC000062001300	-8.8	302	-9.4	208	-9.3	251	253.667
ZINC000021897756	-8.9	238	-9.2	337	-9.4	187	254
ZINC000024973004	-9.5	40	-8.8	708	-10	24	257.333
ZINC000005222143	-8.7	367	-10.1	30	-9.1	383	260
ZINC000009418760	-8.5	538	-10	43	-9.4	199	260
ZINC000000348815	-8.9	241	-9.1	399	-9.5	140	260
ZINC000011866009	-9.1	150	-9.1	392	-9.3	243	261.667
ZINC000013655690	-8.7	385	-9.4	212	-9.4	191	262.667
ZINC000038541161	-9.2	94	-9.3	242	-9	455	263.667
ZINC000000864974	-8.7	377	-9.5	158	-9.3	257	264
ZINC000072324946	-9	191	-9	487	-9.5	135	271
ZINC000000858419	-9.4	50	-9.2	312	-9	452	271.333
ZINC000015514750	-8.6	463	-9.5	165	-9.4	196	274.667
ZINC000004511289	-9.2	91	-9.4	184	-8.9	556	277
ZINC000002440299	-9.3	67	-9.2	313	-9	453	277.667
ZINC000000985309	-8.5	540	-9.7	94	-9.4	200	278
ZINC000008764734	-8.4	657	-9.5	170	-10.3	12	279.667
ZINC000000729798	-8.7	372	-9.7	89	-9.1	384	281.667
ZINC000054219982	-8.8	312	-9.2	344	-9.4	190	282
ZINC000003567049	-8.7	379	-9.5	160	-9.2	309	282.667
ZINC000002663838	-8.6	460	-9.6	131	-9.3	261	284
ZINC000001056531	-8.9	227	-9.3	254	-9.1	372	284.333
ZINC000008764808	-8.7	381	-9.5	162	-9.2	310	284.333
ZINC000005556278	-8.7	395	-9.2	349	-9.6	113	285.667
ZINC000000519805	-8.9	232	-9.2	331	-9.2	302	288.333
ZINC000004520331	-8.8	320	-9.1	410	-9.5	142	290.667
ZINC000000030231	-8.9	216	-9.4	195	-9	464	291.667
ZINC000001076065	-8.8	297	-9.4	203	-9.1	375	291.667
ZINC000040312939	-8.8	323	-9.1	413	-9.5	143	293
ZINC000020573515	-8.8	301	-9.4	207	-9.1	376	294.667
ZINC000004023882	-8.6	461	-9.5	163	-9.3	262	295.333
ZINC000015634188	-9	177	-9.3	249	-9	461	295.667
ZINC000000485974	-8.4	655	-9.6	133	-9.6	119	302.333
ZINC000072324644	-8.8	313	-9.2	345	-9.3	252	303.333
ZINC000000940122	-9.1	144	-9.2	318	-9	457	306.333
ZINC000002932920	-8.7	378	-9.5	159	-9.1	385	307.333
ZINC000070666235	-9	176	-9.4	194	-8.9	560	310
ZINC000017370419	-8.6	473	-9.3	268	-9.4	197	312.667
ZINC000008764696	-9.5	30	-9.6	105	-8.7	805	313.333
ZINC000000252947	-8.9	240	-9.1	398	-9.2	303	313.667
ZINC000000214503	-8.9	225	-9.3	252	-9	465	314
ZINC000000851402	-9.2	98	-9.1	391	-9	456	315
ZINC000007608804	-9	185	-9.1	395	-9.1	366	315.333
ZINC000032124207	-8.6	465	-9.5	167	-9.2	314	315.333
ZINC000116692853	-9.3	72	-8.9	582	-9.2	292	315.333
ZINC000096116521	-8.6	477	-9.3	272	-9.4	198	315.667
ZINC000010691961	-8.3	761	-10.1	34	-9.5	155	316.667
ZINC000036139388	-9	187	-9.1	397	-9.1	367	317
ZINC000001061009	-8.8	308	-9.2	340	-9.2	307	318.333
ZINC000012902395	-8.4	654	-9.7	97	-9.4	207	319.333
ZINC000010220492	-9	192	-8.9	588	-9.4	180	320
ZINC000000490460	-9.2	96	-9.2	316	-8.9	557	323
ZINC000008764381	-8.8	328	-9	497	-9.5	144	323
ZINC000217836748	-8.5	548	-9.4	222	-9.4	201	323.667
ZINC000020589218	-9	183	-9.2	328	-9	462	324.333
ZINC000000277750	-8.8	315	-9.1	405	-9.3	253	324.333
ZINC000001782109	-8.4	656	-9.5	169	-9.5	153	326
ZINC000012420464	-8.9	220	-9.4	199	-8.9	562	327
ZINC000001056920	-8.7	384	-9.4	211	-9.1	386	327
ZINC000009184292	-8.5	553	-9.3	277	-9.5	151	327
ZINC000004821129	-8.8	289	-9.6	122	-8.9	573	328
ZINC000004511287	-9.1	134	-9.4	187	-8.8	665	328.667
ZINC000005266402	-8.8	321	-9.1	411	-9.3	254	328.667
ZINC000019938173	-8.9	223	-9.4	202	-8.9	563	329.333
ZINC000012900838	-8.8	291	-9.6	124	-8.9	574	329.667
ZINC000079191935	-9.2	102	-8.8	715	-9.4	173	330
ZINC000032124206	-9.4	54	-8.9	581	-9.1	357	330.667
ZINC000004074101	-8.6	466	-9.4	215	-9.2	315	332
ZINC000004435433	-8.7	392	-9.2	346	-9.3	258	332
ZINC000000851781	-8.4	649	-10.2	17	-9.2	334	333.333
ZINC000065248738	-8.6	469	-9.4	218	-9.2	316	334.333
ZINC000063829210	-8.4	662	-9.4	227	-9.6	120	336.333
ZINC000015513464	-8.7	401	-9.1	417	-9.4	192	336.667
ZINC000006945929	-9.3	74	-8.8	712	-9.3	231	339
ZINC000001183363	-8.7	404	-9	501	-9.6	114	339.667
ZINC000036369849	-9.5	38	-9.4	179	-8.7	806	341
ZINC000020760935	-8.6	464	-9.5	166	-9.1	393	341
ZINC000022766651	-8.3	766	-9.5	171	-9.7	86	341
ZINC000000727753	-8.5	549	-9.3	273	-9.4	202	341.333
ZINC000004520329	-8.8	309	-9.2	341	-9.1	377	342.333
ZINC000008764270	-9.1	149	-9.2	323	-8.9	559	343.667
ZINC000022752975	-8.8	306	-9.3	260	-9	470	345.333
ZINC000000181783	-9.1	157	-8.9	585	-9.2	296	346
ZINC000000053390	-9	188	-9	484	-9.1	368	346.667
ZINC000000351988	-8.9	247	-9	489	-9.2	304	346.667
ZINC000040309335	-8.4	653	-9.9	53	-9.2	335	347
ZINC000032124400	-9.2	100	-8.9	583	-9.1	361	348
ZINC000040309725	-9.1	162	-8.8	718	-9.4	176	352
ZINC000072324730	-8.6	476	-9.3	271	-9.2	317	354.667
ZINC000027747016	-8.4	650	-10.2	18	-9.1	405	357.667
ZINC000000129487	-8.8	326	-9	495	-9.3	255	358.667
ZINC000001180854	-8.8	298	-9.4	204	-8.9	575	359
ZINC000022636588	-9.4	56	-8.7	852	-9.4	169	359
ZINC000064568301	-8.7	387	-9.4	214	-9	478	359.667
ZINC000070666610	-9.4	51	-9	477	-8.9	553	360.333
ZINC000020533805	-9	194	-8.9	590	-9.2	299	361
ZINC000000490459	-8.4	658	-9.4	223	-9.4	208	363
ZINC000000488963	-8.9	252	-8.9	592	-9.3	247	363.667
ZINC000006659874	-8.4	660	-9.4	225	-9.4	209	364.667
ZINC000002927579	-8.8	318	-9.1	408	-9.1	378	368
ZINC000070666646	-8.7	408	-9	505	-9.4	193	368.667
ZINC000000407802	-8.9	242	-9.1	400	-9	466	369.333
ZINC000000947829	-9.1	158	-8.9	586	-9.1	365	369.667
ZINC000012895139	-8.9	211	-9.7	85	-8.7	814	370
ZINC000006724557	-8.9	249	-9	491	-9.1	373	371
ZINC000000645768	-8.2	892	-9.6	135	-9.7	88	371.667
ZINC000000287767	-8.8	307	-9.2	339	-9	471	372.333
ZINC000032124196	-9.3	70	-9.1	389	-8.8	664	374.333
ZINC000000093725	-8.9	230	-9.2	329	-8.9	564	374.333
ZINC000006732687	-8.7	396	-9.2	350	-9.1	387	377.667
ZINC000007968746	-8.9	235	-9.2	334	-8.9	565	378
ZINC000006948145	-9.1	148	-9.2	322	-8.8	666	378.667
ZINC000000054796	-8.6	458	-9.7	92	-8.9	586	378.667
ZINC000009485381	-8.9	236	-9.2	335	-8.9	566	379
ZINC000020733688	-8.9	237	-9.2	336	-8.9	567	380
ZINC000005141342	-8.9	254	-8.9	594	-9.2	305	384.333
ZINC000036370010	-8.5	573	-9	519	-9.8	62	384.667
ZINC000000940064	-8.4	665	-9.3	281	-9.4	210	385.333
ZINC000000547821	-8.7	402	-9	499	-9.3	259	386.667
ZINC000020623794	-8.5	546	-9.4	220	-9.1	400	388.667
ZINC000002816522	-8.6	484	-9.1	421	-9.3	263	389.333
ZINC000005163218	-8.2	894	-9.6	137	-9.5	156	395.667
ZINC000012458366	-8.2	895	-9.6	138	-9.5	157	396.667
ZINC000000619505	-8.8	316	-9.1	406	-9	472	398
ZINC000004538911	-8.5	563	-9.1	431	-9.4	203	399
ZINC000000088393	-9.1	156	-8.9	584	-9	458	399.333
ZINC000004743662	-8.5	564	-9.1	432	-9.4	204	400
ZINC000004041116	-8.8	319	-9.1	409	-9	473	400.333
ZINC000036370049	-8.5	544	-9.5	168	-9	493	401.667
ZINC000020427691	-9.1	151	-9.1	393	-8.8	667	403.667
ZINC000065248686	-8.9	251	-9	493	-9	467	403.667
ZINC000079193450	-8.8	324	-9.1	414	-9	474	404
ZINC000062001586	-8.9	244	-9.1	402	-8.9	568	404.667
ZINC000085875089	-8.9	245	-9.1	403	-8.9	569	405.667
ZINC000005140805	-8.7	393	-9.2	347	-9	479	406.333
ZINC000000851756	-8.6	482	-9.1	419	-9.2	318	406.333
ZINC000005164114	-8.7	394	-9.2	348	-9	480	407.333
ZINC000013572042	-8.4	661	-9.4	226	-9.2	336	407.667
ZINC000035376326	-8.4	669	-9.3	285	-9.3	269	407.667
ZINC000072325084	-8.7	409	-9	506	-9.2	311	408.667
ZINC000004722167	-8.5	551	-9.3	275	-9.1	401	409
ZINC000008156839	-8.7	397	-9.2	351	-9	481	409.667
ZINC000026524149	-8.6	474	-9.3	269	-9	487	410
ZINC000070666286	-8.6	489	-9.1	426	-9.2	319	411.333
ZINC000056452021	-8.9	260	-8.8	726	-9.3	248	411.333
ZINC000011764554	-9.3	75	-8.8	713	-9	454	414
ZINC000012899768	-8.5	559	-9.2	360	-9.2	325	414.667
ZINC000012894375	-9	193	-8.9	589	-9	463	415
ZINC000013655372	-8.3	763	-9.8	73	-9.1	411	415.667
ZINC000072326175	-8.5	576	-9	522	-9.5	152	416.667
ZINC000004754367	-9.1	135	-9.4	188	-8.6	932	418.333
ZINC000015632981	-9.8	17	-8.9	579	-8.8	662	419.333
ZINC000054105911	-9	173	-9.5	154	-8.6	935	420.667
ZINC000217666784	-8.4	687	-9	530	-9.9	46	421
ZINC000004089132	-8.4	677	-9.1	436	-9.5	154	422.333
ZINC000065248835	-9.4	57	-8.7	853	-9.1	358	422.667
ZINC000006760504	-8.5	543	-9.6	132	-8.9	594	423
ZINC000000797604	-8.4	664	-9.3	280	-9.2	337	427
ZINC000000882730	-8.7	383	-9.4	210	-8.8	690	427.667
ZINC000001033116	-8.4	666	-9.3	282	-9.2	338	428.667
ZINC000004857359	-8.4	659	-9.4	224	-9.1	406	429.667
ZINC000006759854	-8.4	667	-9.3	283	-9.2	339	429.667
ZINC000000082732	-8.9	224	-9.3	251	-8.7	815	430
ZINC000000622396	-8.7	403	-9	500	-9.1	388	430.333
ZINC000018074513	-8.4	652	-10	44	-8.9	604	433.333
ZINC000012894938	-9.1	153	-9	481	-8.8	668	434
ZINC000000980824	-8.2	893	-9.6	136	-9.3	276	435
ZINC000096115530	-9.1	155	-9	483	-8.8	669	435.667
ZINC000000616244	-8.8	331	-8.9	598	-9.1	379	436
ZINC000070666334	-8.9	263	-8.7	859	-9.4	188	436.667
ZINC000004314036	-8.8	333	-8.9	600	-9.1	380	437.667
ZINC000049543708	-8.9	243	-9.1	401	-8.8	672	438.667
ZINC000004171960	-9	181	-9.2	326	-8.7	811	439.333
ZINC000003087481	-8.5	550	-9.3	274	-9	494	439.333
ZINC000000952697	-8.6	491	-9	507	-9.2	320	439.333
ZINC000002117358	-8.6	478	-9.2	353	-9	488	439.667
ZINC000002927662	-8.6	492	-9	508	-9.2	321	440.333
ZINC000040312660	-9.1	142	-9.3	247	-8.6	933	440.667
ZINC000000139047	-8.7	410	-8.9	601	-9.2	312	441
ZINC000036370107	-8.6	495	-9	511	-9.2	322	442.667
ZINC000070666621	-8.6	496	-9	512	-9.2	323	443.667
ZINC000040310251	-8.8	311	-9.2	343	-8.8	678	444
ZINC000008765244	-8.6	506	-8.8	748	-9.7	82	445.333
ZINC000000214590	-9.3	73	-8.8	711	-8.9	555	446.333
ZINC000001043658	-8.5	541	-9.7	95	-8.8	704	446.667
ZINC000011689966	-8.6	508	-8.8	750	-9.7	83	447
ZINC000000669599	-8.7	432	-8.7	868	-9.9	42	447.333
ZINC000072325588	-8.8	354	-8.6	987	-10.4	7	449.333
ZINC000000846556	-8.5	569	-9	515	-9.3	266	450
ZINC000000612125	-8.8	347	-8.7	863	-9.5	145	451.667
ZINC000072324908	-8.7	429	-8.8	743	-9.4	194	455.333
ZINC000005140634	-8.9	262	-8.7	858	-9.3	249	456.333
ZINC000065248812	-9.1	132	-9.5	153	-8.5	1093	459.333
ZINC000006719077	-8.4	674	-9.2	364	-9.2	340	459.333
ZINC000000086306	-8.4	676	-9.1	435	-9.3	270	460.333
ZINC000031238808	-8.6	468	-9.4	217	-8.8	697	460.667
ZINC000000407129	-8.7	399	-9.1	415	-8.9	580	464.667
ZINC000040312888	-9.6	25	-8.8	707	-8.8	663	465
ZINC000009532155	-8.7	400	-9.1	416	-8.9	581	465.667
ZINC000006847728	-8.6	487	-9.1	424	-9	489	466.667
ZINC000000488867	-8.7	411	-8.9	602	-9.1	389	467.333
ZINC000000204257	-8.5	579	-8.9	620	-9.4	205	468
ZINC000000881320	-8.3	786	-9	532	-9.7	87	468.333
ZINC000000268624	-8.9	246	-9	488	-8.8	673	469
ZINC000011866008	-8.8	322	-9.1	412	-8.8	679	471
ZINC000001812712	-8.5	571	-9	517	-9.2	326	471.333
ZINC000020731356	-9.1	159	-8.9	587	-8.8	670	472
ZINC000000263543	-8.4	682	-9	525	-9.4	211	472.667
ZINC000040312473	-8.7	419	-8.9	610	-9.1	390	473
ZINC000064384165	-8.9	255	-8.9	595	-8.9	570	473.333
ZINC000040312427	-8.6	480	-9.2	355	-8.9	587	474
ZINC000181014801	-8.9	256	-8.9	596	-8.9	571	474.333
ZINC000056452763	-8.4	685	-9	528	-9.4	212	475
ZINC000000872110	-8.6	470	-9.3	265	-8.8	698	477.667
ZINC000002927517	-8.6	472	-9.3	267	-8.8	699	479.333
ZINC000000123440	-9	179	-9.2	324	-8.6	936	479.667
ZINC000015658352	-8.7	398	-9.2	352	-8.8	691	480.333
ZINC000065248827	-9.2	103	-8.6	976	-9.1	362	480.333
ZINC000032091280	-8.6	475	-9.3	270	-8.8	700	481.667
ZINC000031035270	-8.3	767	-9.5	172	-9	507	482
ZINC000020762756	-8.4	675	-9.2	365	-9.1	407	482.333
ZINC000007971486	-8.8	300	-9.4	206	-8.6	944	483.333
ZINC000004487684	-8.8	338	-8.8	731	-9.1	381	483.333
ZINC000007609872	-8.6	462	-9.5	164	-8.7	828	484.667
ZINC000009486197	-8.4	678	-9.1	437	-9.2	341	485.333
ZINC000006228377	-8.3	768	-9.3	287	-9.1	412	489
ZINC000041428388	-8.3	769	-9.3	288	-9.1	413	490
ZINC000263585734	-9.1	163	-8.7	855	-9	459	492.333
ZINC000002623960	-9	197	-8.8	720	-8.9	561	492.667
ZINC000000085850	-8.5	567	-9	513	-9.1	402	494
ZINC000031034621	-8.5	588	-8.9	629	-9.3	267	494.667
ZINC000001156352	-8.5	561	-9.1	429	-9	495	495
ZINC000005163698	-8.7	406	-9	503	-8.9	582	497
ZINC000001812713	-8.2	903	-9.2	374	-9.4	216	497.667
ZINC000006724282	-8.6	485	-9.1	422	-8.9	588	498.333
ZINC000006732688	-8.6	486	-9.1	423	-8.9	589	499.333
ZINC000000488975	-8.8	327	-9	496	-8.8	680	501
ZINC000000049564	-8.6	497	-8.9	614	-9.1	394	501.667
ZINC000034786191	-8	1185	-9.7	99	-9.4	222	502
ZINC000005378510	-8.8	304	-9.3	258	-8.6	945	502.333
ZINC000015739216	-8.8	329	-9	498	-8.8	681	502.667
ZINC000012421821	-8.8	305	-9.3	259	-8.6	946	503.333
ZINC000004046033	-8.6	500	-8.9	617	-9.1	395	504
ZINC000002150596	-9	184	-9.1	394	-8.6	937	505
ZINC000082138166	-8.7	421	-8.9	612	-9	482	505
ZINC000005221630	-8.6	501	-8.9	618	-9.1	396	505
ZINC000008765456	-8.6	507	-8.8	749	-9.3	264	506.667
ZINC000000851775	-8.1	1023	-9.4	230	-9.3	278	510.333
ZINC000003833919	-8.5	582	-8.9	623	-9.2	327	510.667
ZINC000006421318	-8.5	552	-9.3	276	-8.8	705	511
ZINC000008764953	-8.5	585	-8.9	626	-9.2	328	513
ZINC000002146465	-8.8	317	-9.1	407	-8.7	820	514.667
ZINC000004112271	-8.2	897	-9.4	229	-9.1	422	516
ZINC000096114513	-8.4	696	-8.9	639	-9.4	213	516
ZINC000000037947	-8.7	423	-8.8	737	-9.1	391	517
ZINC000006624119	-8.9	266	-8.6	981	-9.2	306	517.667
ZINC000003019221	-8.9	248	-9	490	-8.7	816	518
ZINC000040313037	-8.8	343	-8.8	736	-9	475	518
ZINC000006756098	-8.3	774	-9.2	366	-9.1	414	518
ZINC000000287773	-8.9	259	-8.8	725	-8.9	572	518.667
ZINC000096221940	-9.5	41	-8.8	709	-8.7	807	519
ZINC000015511641	-8.4	668	-9.3	284	-8.9	605	519
ZINC000009184550	-8.9	250	-9	492	-8.7	817	519.667
ZINC000008764985	-9.4	53	-8.9	580	-8.6	930	521
ZINC000057268629	-8.3	778	-9.2	370	-9.1	415	521
ZINC000009420622	-8.2	907	-9.1	447	-9.4	217	523.667
ZINC000096222341	-8.3	802	-8.9	649	-9.6	122	524.333
ZINC000005442713	-8.6	504	-8.8	746	-9.2	324	524.667
ZINC000004018828	-9.2	105	-8.3	1422	-9.7	70	532.333
ZINC000085876604	-9	195	-8.9	591	-8.7	812	532.667
ZINC000004487680	-8.3	789	-9	535	-9.3	274	532.667
ZINC000062001579	-8.5	547	-9.4	221	-8.7	835	534.333
ZINC000005324266	-8.7	407	-9	504	-8.8	692	534.333
ZINC000003634344	-8.6	499	-8.9	616	-9	490	535
ZINC000011867272	-8.7	417	-8.9	608	-8.9	583	536
ZINC000036369806	-9.5	42	-8.5	1119	-9	451	537.333
ZINC000005221405	-8.5	584	-8.9	625	-9.1	403	537.333
ZINC000002314305	-8.8	332	-8.9	599	-8.8	682	537.667
ZINC000000100039	-8.4	681	-9	524	-9.1	408	537.667
ZINC000000535116	-8.2	898	-9.3	293	-9.1	423	538
ZINC000003532866	-8.5	556	-9.2	357	-8.8	706	539.667
ZINC000096115529	-8.7	422	-8.9	613	-8.9	584	539.667
ZINC000032123999	-8.3	765	-9.6	134	-8.8	725	541.333
ZINC000006751924	-8.5	558	-9.2	359	-8.8	707	541.333
ZINC000005034278	-8.8	357	-8.5	1127	-9.5	146	543.333
ZINC000079192767	-9.2	104	-8.6	977	-8.9	558	546.333
ZINC000000121773	-8.4	672	-9.2	362	-8.9	606	546.667
ZINC000000846624	-8.8	336	-8.8	729	-8.9	576	547
ZINC000000252942	-8.9	257	-8.8	723	-8.8	674	551.333
ZINC000000048966	-8.8	314	-9.1	404	-8.6	947	555
ZINC000040313049	-8.5	554	-9.3	278	-8.7	836	556
ZINC000008879755	-8	1197	-9.2	382	-9.7	89	556
ZINC000011865133	-8.1	1026	-9.3	296	-9.2	351	557.667
ZINC000096221891	-8.3	773	-9.3	292	-8.9	609	558
ZINC000031840679	-8.4	695	-8.9	638	-9.2	342	558.333
ZINC000000077982	-8.8	344	-8.7	860	-9	476	560
ZINC000012902904	-8.5	595	-8.8	757	-9.2	329	560.333
ZINC000006727258	-8.5	572	-9	518	-8.9	595	561.667
ZINC000000465698	-8.2	915	-8.9	651	-9.6	123	563
ZINC000070666561	-8.5	575	-9	521	-8.9	596	564
ZINC000000091600	-8.5	560	-9.1	428	-8.8	708	565.333
ZINC000005163220	-8.5	583	-8.9	624	-9	496	567.667
ZINC000000725545	-8.7	412	-8.9	603	-8.8	693	569.333
ZINC000013688865	-8.5	586	-8.9	627	-9	497	570
ZINC000020193380	-8.4	684	-9	527	-9	501	570.667
ZINC000000195406	-8.8	350	-8.6	983	-9.1	382	571.667
ZINC000072324467	-8.4	686	-9	529	-9	502	572.333
ZINC000064818409	-8.5	589	-8.9	630	-9	498	572.333
ZINC000000036322	-8.3	779	-9.1	440	-9	508	575.667
ZINC000002120125	-8.3	780	-9.1	441	-9	509	576.667
ZINC000015634041	-9.3	76	-8.7	854	-8.7	808	579.333
ZINC000002156096	-8.6	503	-8.8	745	-9	491	579.667
ZINC000040309767	-8.4	703	-8.8	765	-9.3	271	579.667
ZINC000012900626	-8.4	694	-8.9	637	-9.1	409	580
ZINC000020348995	-8.6	488	-9.1	425	-8.7	829	580.667
ZINC000062001517	-9.2	101	-8.8	714	-8.6	931	582
ZINC000041127953	-8.3	792	-9	538	-9.1	416	582
ZINC000016985268	-8.4	721	-8.6	1011	-10.2	14	582
ZINC000002954356	-8.2	896	-9.4	228	-8.9	623	582.333
ZINC000002241474	-8.5	592	-8.8	754	-9.1	404	583.333
ZINC000065248889	-8.6	528	-8.5	1138	-9.7	84	583.333
ZINC000020149715	-9.3	69	-9.2	315	-8.3	1368	584
ZINC000008997481	-8.8	310	-9.2	342	-8.5	1100	584
ZINC000001431477	-8.4	673	-9.2	363	-8.8	716	584
ZINC000005442715	-8.8	339	-8.8	732	-8.8	683	584.667
ZINC000036369966	-8.3	777	-9.2	369	-8.9	610	585.333
ZINC000036370048	-8.1	1028	-9.3	298	-9.1	430	585.333
ZINC000000037946	-8.8	325	-9	494	-8.6	948	589
ZINC000004171961	-8.7	440	-8.5	1133	-9.4	195	589.333
ZINC000001056074	-8	1191	-9.3	300	-9.3	279	590
ZINC000000995046	-8.2	906	-9.1	446	-9.1	424	592
ZINC000000176670	-8.3	793	-8.9	640	-9.2	346	593
ZINC000000129480	-8.6	510	-8.7	873	-9.1	397	593.333
ZINC000000459362	-8.8	346	-8.7	862	-8.9	577	595
ZINC000036369810	-8.6	524	-8.6	996	-9.3	265	595
ZINC000002361668	-8.9	253	-8.9	593	-8.6	940	595.333
ZINC000049513423	-8.3	771	-9.3	290	-8.8	726	595.667
ZINC000004743640	-8.7	435	-8.7	871	-9	483	596.333
ZINC000062090016	-8.6	516	-8.7	879	-9.1	398	597.667
ZINC000004687314	-8.2	904	-9.2	375	-9	517	598.667
ZINC000000340372	-8.5	580	-8.9	621	-8.9	597	599.333
ZINC000000488868	-8.4	697	-8.8	759	-9.2	343	599.667
ZINC000040310270	-8.4	670	-9.3	286	-8.7	846	600.667
ZINC000040310308	-8.5	574	-9	520	-8.8	709	601
ZINC000032124340	-8.2	912	-9	542	-9.2	349	601
ZINC000012895456	-8.4	700	-8.8	762	-9.2	344	602
ZINC000100447609	-8.2	927	-8.9	663	-9.4	218	602.667
ZINC000020436649	-8.5	587	-8.9	628	-8.9	598	604.333
ZINC000001043659	-8.3	762	-9.8	72	-8.6	981	605
ZINC000000811627	-8.5	601	-8.7	884	-9.2	330	605
ZINC000064678933	-8.8	353	-8.6	986	-9	477	605.333
ZINC000000946440	-8.5	603	-8.7	886	-9.2	331	606.667
ZINC000001459962	-8.4	690	-8.9	633	-9	503	608.667
ZINC000062001309	-8.5	607	-8.7	890	-9.2	332	609.667
ZINC000003984924	-8.4	692	-8.9	635	-9	504	610.333
ZINC000004151766	-8.3	788	-9	534	-9	510	610.667
ZINC000041146470	-8.4	680	-9.1	439	-8.8	717	612
ZINC000000122544	-8.6	502	-8.8	744	-8.9	590	612
ZINC000040313185	-8.3	783	-9.1	444	-8.9	611	612.667
ZINC000054105913	-8.3	784	-9.1	445	-8.9	612	613.667
ZINC000008764460	-8.7	416	-8.9	607	-8.7	825	616
ZINC000000434079	-8.7	424	-8.8	738	-8.8	694	618.667
ZINC000040312544	-9	198	-8.8	721	-8.6	938	619
ZINC000004834423	-8	1187	-9.4	233	-9.1	438	619.333
ZINC000000545897	-8.7	425	-8.8	739	-8.8	695	619.667
ZINC000170625752	-9	199	-8.8	722	-8.6	939	620
ZINC000012893479	-8.9	270	-8.5	1124	-9	468	620.667
ZINC000062001299	-9	200	-8.7	856	-8.7	813	623
ZINC000012894021	-8.3	775	-9.2	367	-8.8	727	623
ZINC000000970802	-7.8	1538	-9.5	173	-9.5	161	624
ZINC000003567051	-8.2	909	-9	539	-9.1	425	624.333
ZINC000005346547	-8.5	557	-9.2	358	-8.6	962	625.667
ZINC000000075050	-8.4	671	-9.2	361	-8.7	847	626.333
ZINC000070666562	-7.9	1349	-9.3	307	-9.4	223	626.333
ZINC000000389336	-8.8	334	-8.8	727	-8.7	821	627.333
ZINC000002205059	-8.5	545	-9.4	219	-8.5	1119	627.667
ZINC000012895520	-8.6	515	-8.7	878	-9	492	628.333
ZINC000070666648	-8.7	391	-9.3	264	-8.4	1232	629
ZINC000008878835	-8.7	441	-8.5	1134	-9.2	313	629.333
ZINC000000898145	-8.8	337	-8.8	730	-8.7	822	629.667
ZINC000007608976	-8.8	340	-8.8	733	-8.7	823	632
ZINC000070666586	-8.8	349	-8.7	865	-8.8	684	632.667
ZINC000009776582	-8.8	341	-8.8	734	-8.7	824	633
ZINC000000047236	-8.5	578	-8.9	619	-8.8	710	635.667
ZINC000003958696	-8.7	437	-8.6	988	-9	484	636.333
ZINC000008879403	-8.6	521	-8.6	993	-9.1	399	637.667
ZINC000000636759	-8.4	663	-9.3	279	-8.6	973	638.333
ZINC000000663198	-8.5	568	-9	514	-8.7	837	639.667
ZINC000000252954	-8.9	258	-8.8	724	-8.6	941	641
ZINC000000851783	-8.5	570	-9	516	-8.7	838	641.333
ZINC000000307989	-8.4	688	-8.9	631	-8.9	607	642
ZINC000000851762	-8.3	785	-9	531	-8.9	613	643
ZINC000006750389	-8.1	1030	-9.2	378	-9	524	644
ZINC000055441332	-8	1214	-9	560	-9.5	159	644.333
ZINC000027749433	-8.2	899	-9.3	294	-8.8	741	644.667
ZINC000004084925	-8.3	787	-9	533	-8.9	614	644.667
ZINC000004740491	-8.8	303	-9.3	257	-8.3	1375	645
ZINC000000084773	-8.9	261	-8.7	857	-8.7	818	645.333
ZINC000005304982	-7.9	1348	-9.3	306	-9.3	282	645.333
ZINC000005184209	-8.4	693	-8.9	636	-8.9	608	645.667
ZINC000079189544	-8.5	577	-9	523	-8.7	839	646.333
ZINC000006875695	-8.4	719	-8.6	1009	-9.4	214	647.333
ZINC000002120006	-8.6	498	-8.9	615	-8.7	830	647.667
ZINC000004740494	-8.6	479	-9.2	354	-8.5	1112	648.333
ZINC000009095535	-8.1	1053	-8.9	674	-9.4	219	648.667
ZINC000079190538	-8.4	722	-8.6	1012	-9.4	215	649.667
ZINC000002442605	-8.3	781	-9.1	442	-8.8	728	650.333
ZINC000001774455	-8.5	562	-9.1	430	-8.6	963	651.667
ZINC000000646122	-8.5	618	-8.5	1142	-9.4	206	655.333
ZINC000004580100	-8.2	910	-9	540	-9	518	656
ZINC000017127731	-9.1	161	-8.8	717	-8.5	1094	657.333
ZINC000000117155	-8.5	597	-8.7	880	-9	499	658.667
ZINC000027667834	-8.7	418	-8.9	609	-8.6	952	659.667
ZINC000022609257	-8.2	908	-9.1	448	-8.9	624	660
ZINC000007966947	-8.6	514	-8.7	877	-8.9	591	660.667
ZINC000000846863	-8.5	602	-8.7	885	-9	500	662.333
ZINC000009614689	-8.7	426	-8.8	740	-8.7	826	664
ZINC000011689965	-9.4	55	-8.8	710	-8.4	1228	664.333
ZINC000038031717	-9	201	-8.5	1121	-8.8	671	664.333
ZINC000004563192	-8.2	916	-8.9	652	-9.1	426	664.667
ZINC000040310009	-8.7	428	-8.8	742	-8.7	827	665.667
ZINC000015511559	-8.3	776	-9.2	368	-8.7	854	666
ZINC000004487678	-8.3	809	-8.8	772	-9.1	417	666
ZINC000006727259	-8.3	810	-8.8	773	-9.1	418	667
ZINC000032123936	-8.2	921	-8.9	657	-9.1	427	668.333
ZINC000032124344	-9.1	154	-9	482	-8.3	1370	668.667
ZINC000020745248	-8.3	822	-8.7	909	-9.3	275	668.667
ZINC000000429239	-8.1	1033	-9	544	-9.1	431	669.333
ZINC000042025246	-8.2	923	-8.9	659	-9.1	428	670
ZINC000049543307	-8.6	533	-8.3	1434	-9.9	44	670.333
ZINC000000052258	-8.6	481	-9.1	418	-8.5	1113	670.667
ZINC000000488054	-8.8	335	-8.8	728	-8.6	949	670.667
ZINC000000626450	-8.1	1035	-9	546	-9.1	432	671
ZINC000001177649	-8.1	1036	-9	547	-9.1	433	672
ZINC000001414401	-8.2	902	-9.2	373	-8.8	742	672.333
ZINC000001183226	-8.8	351	-8.6	984	-8.8	685	673.333
ZINC000000671043	-8	1190	-9.3	299	-9	533	674
ZINC000002118094	-8.9	272	-8.4	1281	-9	469	674
ZINC000032123824	-8.8	352	-8.6	985	-8.8	686	674.333
ZINC000004740496	-8.7	388	-9.3	261	-8.3	1378	675.667
ZINC000000217204	-8.8	330	-8.9	597	-8.5	1101	676
ZINC000002739191	-8.5	555	-9.2	356	-8.5	1120	677
ZINC000170625487	-8.6	490	-9.1	427	-8.5	1114	677
ZINC000013625485	-8.5	621	-8.5	1145	-9.3	268	678
ZINC000000947828	-8.5	626	-8.4	1292	-9.6	117	678.333
ZINC000002125110	-8.4	691	-8.9	634	-8.8	718	681
ZINC000055044019	-8.3	772	-9.3	291	-8.6	982	681.667
ZINC000001147793	-9	189	-9	485	-8.3	1372	682
ZINC000003033906	-8	1210	-9	556	-9.3	280	682
ZINC000040309997	-9	190	-9	486	-8.3	1373	683
ZINC000000457518	-8.7	439	-8.5	1132	-9	485	685.333
ZINC000008765016	-8	1188	-9.4	234	-8.9	637	686.333
ZINC000064568304	-8.3	800	-8.9	647	-8.9	615	687.333
ZINC000000181785	-8.9	268	-8.5	1122	-8.8	675	688.333
ZINC000000811628	-8.9	269	-8.5	1123	-8.8	676	689.333
ZINC000000645771	-9.1	164	-8.6	978	-8.6	934	692
ZINC000015511616	-8.2	911	-9	541	-8.9	625	692.333
ZINC000004056187	-8.1	1065	-8.8	792	-9.4	220	692.333
ZINC000000633911	-8.5	599	-8.7	882	-8.9	599	693.333
ZINC000000084016	-8.2	914	-8.9	650	-9	519	694.333
ZINC000005123741	-7.8	1536	-9.7	101	-9.1	446	694.333
ZINC000000940124	-8.3	806	-8.8	769	-9	511	695.333
ZINC000016753970	-8.4	679	-9.1	438	-8.6	974	697
ZINC000004185236	-8.5	604	-8.7	887	-8.9	600	697
ZINC000065248715	-9.1	165	-8.5	1120	-8.7	809	698
ZINC000005177425	-8	1204	-9.1	454	-9.1	439	699
ZINC000000457522	-8.6	518	-8.6	990	-8.9	592	700
ZINC000000626134	-8.1	1034	-9	545	-9	525	701.333
ZINC000253414997	-8	1207	-9.1	457	-9.1	440	701.333
ZINC000001230512	-8	1195	-9.2	380	-9	534	703
ZINC000019897822	-8.6	523	-8.6	995	-8.9	593	703.667
ZINC000000851800	-8.1	1032	-9.1	450	-8.9	631	704.333
ZINC000009940895	-8.6	493	-9	509	-8.5	1115	705.667
ZINC000008764453	-7.7	1686	-9.3	308	-9.6	124	706
ZINC000001206269	-8.6	471	-9.3	266	-8.3	1383	706.667
ZINC000027793184	-8.6	494	-9	510	-8.5	1116	706.667
ZINC000002262654	-8.7	413	-8.9	604	-8.5	1104	707
ZINC000062001349	-8.1	1042	-9	553	-9	526	707
ZINC000072325745	-8.9	239	-9.2	338	-8.2	1545	707.333
ZINC000021095374	-8.7	445	-8.4	1288	-9.1	392	708.333
ZINC000005351131	-8.7	415	-8.9	606	-8.5	1105	708.667
ZINC000000862857	-8.2	901	-9.2	372	-8.7	862	711.667
ZINC000040312825	-8.7	420	-8.9	611	-8.5	1106	712.333
ZINC000002435963	-8.7	405	-9	502	-8.4	1233	713.333
ZINC000012893432	-8.2	905	-9.2	376	-8.7	863	714.667
ZINC000008115511	-8.3	820	-8.7	907	-9.1	419	715.333
ZINC000002479361	-8.1	1048	-8.9	669	-9.1	434	717
ZINC000000784164	-8.1	1029	-9.2	377	-8.8	753	719.667
ZINC000015789798	-8.8	348	-8.7	864	-8.6	950	720.667
ZINC000072325058	-8.7	442	-8.5	1135	-8.9	585	720.667
ZINC000065248834	-8.4	737	-8.4	1304	-9.6	121	720.667
ZINC000000790589	-8.3	794	-8.9	641	-8.8	729	721.333
ZINC000002219622	-8.5	581	-8.9	622	-8.6	964	722.333
ZINC000000464051	-8.4	689	-8.9	632	-8.7	848	723
ZINC000001182734	-8.8	356	-8.5	1126	-8.8	687	723
ZINC000007941110	-8.3	797	-8.9	644	-8.8	730	723.667
ZINC000015627354	-8.8	358	-8.5	1128	-8.8	688	724.667
ZINC000019720165	-8.3	799	-8.9	646	-8.8	731	725.333
ZINC000040313090	-8.8	360	-8.5	1130	-8.8	689	726.333
ZINC000016850754	-8.3	791	-9	537	-8.7	855	727.667
ZINC000000674221	-8.5	591	-8.8	753	-8.7	840	728
ZINC000000204260	-8.9	264	-8.6	979	-8.6	942	728.333
ZINC000000851790	-7.9	1345	-9.3	303	-9	538	728.667
ZINC000000319130	-8.5	598	-8.7	881	-8.8	711	730
ZINC000002954357	-7.9	1347	-9.3	305	-9	539	730.333
ZINC000014890901	-8.5	596	-8.8	758	-8.7	841	731.667
ZINC000006760322	-8	1206	-9.1	456	-9	535	732.333
ZINC000041146472	-8.2	913	-9	543	-8.8	743	733
ZINC000020412466	-8.2	919	-8.9	655	-8.9	626	733.333
ZINC000008917212	-8.5	605	-8.7	888	-8.8	712	735
ZINC000063829072	-8.3	814	-8.8	777	-8.9	616	735.667
ZINC000000952696	-8.5	609	-8.6	998	-8.9	601	736
ZINC000006947000	-8	1212	-9	558	-9.1	441	737
ZINC000002847132	-8.6	511	-8.7	874	-8.7	831	738.667
ZINC000016469236	-8	1198	-9.2	383	-8.9	638	739.667
ZINC000072324739	-8.3	843	-8.6	1029	-9.2	347	739.667
ZINC000040309154	-8	1199	-9.2	384	-8.9	639	740.667
ZINC000072324913	-8.6	525	-8.6	997	-8.8	701	741
ZINC000006719986	-8.1	1040	-9	551	-8.9	632	741
ZINC000012898325	-8.2	931	-8.8	781	-9	520	744
ZINC000016645732	-8.2	932	-8.8	782	-9	521	745
ZINC000000797605	-8.1	1044	-8.9	665	-9	527	745.333
ZINC000004743653	-8.3	819	-8.7	906	-9	512	745.667
ZINC000000082960	-9.1	160	-8.8	716	-8.3	1371	749
ZINC000000451617	-8.7	430	-8.7	866	-8.6	953	749.667
ZINC000000457424	-8.7	431	-8.7	867	-8.6	954	750.667
ZINC000020761444	-8	1192	-9.3	301	-8.8	764	752.333
ZINC000007006309	-8.3	764	-9.7	98	-8.3	1396	752.667
ZINC000003117428	-8.7	434	-8.7	870	-8.6	955	753
ZINC000065248739	-9	203	-8.1	1692	-9.1	369	754.667
ZINC000000526112	-8.2	900	-9.2	371	-8.6	996	755.667
ZINC000040309308	-8.7	427	-8.8	741	-8.5	1107	758.333
ZINC000003048761	-8.3	835	-8.6	1021	-9.1	420	758.667
ZINC000000626906	-8.1	1062	-8.8	789	-9.1	435	762
ZINC000012296515	-8.4	726	-8.5	1150	-9.1	410	762
ZINC000002433715	-8.6	483	-9.1	420	-8.3	1384	762.333
ZINC000000727754	-8.1	1063	-8.8	790	-9.1	436	763
ZINC000096221709	-7.8	1537	-9.7	102	-8.9	653	764
ZINC000008671542	-7.8	1542	-9.1	466	-9.3	285	764.333
ZINC000000263629	-8	1202	-9.1	452	-8.9	640	764.667
ZINC000000528975	-8.3	803	-8.8	766	-8.8	732	767
ZINC000034689318	-8.1	1071	-8.8	798	-9.1	437	768.667
ZINC000000200921	-8.5	590	-8.8	752	-8.6	965	769
ZINC000008843813	-8.4	734	-8.4	1301	-9.3	272	769
ZINC000040312963	-8.8	342	-8.8	735	-8.4	1231	769.333
ZINC000000457519	-8.8	345	-8.7	861	-8.5	1102	769.333
ZINC000008287180	-8.3	790	-9	536	-8.6	983	769.667
ZINC000008765338	-8	1189	-9.4	235	-8.7	885	769.667
ZINC000008331791	-8.4	699	-8.8	761	-8.7	849	769.667
ZINC000001801245	-8.3	807	-8.8	770	-8.8	733	770
ZINC000009135062	-8.1	1098	-8.6	1056	-9.5	158	770.667
ZINC000002350392	-8.3	808	-8.8	771	-8.8	734	771
ZINC000000451439	-8.4	704	-8.7	892	-8.8	719	771.667
ZINC000017911589	-8.4	702	-8.8	764	-8.7	850	772
ZINC000027793096	-8.2	920	-8.9	656	-8.8	744	773.333
ZINC000065248828	-8.5	636	-8.2	1566	-9.6	118	773.333
ZINC000006658757	-8.5	611	-8.6	1000	-8.8	713	774.667
ZINC000040309072	-8.2	922	-8.9	658	-8.8	745	775
ZINC000019897818	-8.4	711	-8.7	899	-8.8	720	776.667
ZINC000096221803	-8.2	926	-8.9	662	-8.8	746	778
ZINC000000457454	-8.6	517	-8.6	989	-8.7	832	779.333
ZINC000002097966	-8.3	817	-8.7	904	-8.9	617	779.333
ZINC000003598836	-8.1	1037	-9	548	-8.8	754	779.667
ZINC000000626132	-8.9	265	-8.6	980	-8.5	1096	780.333
ZINC000040309010	-8	1217	-8.9	682	-9.1	442	780.333
ZINC000004681690	-8.6	512	-8.7	875	-8.6	958	781.667
ZINC000035485065	-8.2	934	-8.8	784	-8.9	627	781.667
ZINC000085876933	-8.9	267	-8.6	982	-8.5	1097	782
ZINC000072325968	-7.8	1549	-9	572	-9.4	225	782
ZINC000006942860	-8.1	1041	-9	552	-8.8	755	782.667
ZINC000006947046	-7.9	1352	-9.1	460	-9	540	784
ZINC000034717612	-8.3	824	-8.7	911	-8.9	618	784.333
ZINC000040313055	-8.3	782	-9.1	443	-8.5	1132	785.667
ZINC000000117941	-8.3	830	-8.6	1016	-9	513	786.333
ZINC000001009415	-8.7	446	-8.3	1428	-9	486	786.667
ZINC000004487679	-8.3	853	-8.5	1161	-9.2	348	787.333
ZINC000005034246	-8.8	363	-8.3	1427	-8.9	578	789.333
ZINC000000075055	-8.4	724	-8.5	1148	-9	505	792.333
ZINC000007770866	-8.5	565	-9.1	433	-8.3	1385	794.333
ZINC000096116085	-8.4	729	-8.5	1153	-9	506	796
ZINC000096115712	-8.3	845	-8.6	1031	-9	514	796.667
ZINC000004071072	-8.7	414	-8.9	605	-8.3	1379	799.333
ZINC000072324736	-8.1	1073	-8.8	800	-9	528	800.333
ZINC000025094069	-7.8	1547	-9	570	-9.3	286	801
ZINC000002117097	-8.7	433	-8.7	869	-8.5	1108	803.333
ZINC000005221403	-8.2	962	-8.5	1173	-9.3	277	804
ZINC000016753968	-8.7	436	-8.7	872	-8.5	1109	805.667
ZINC000000839113	-8.3	795	-8.9	642	-8.6	984	807
ZINC000000800005	-8	1203	-9.1	453	-8.8	765	807
ZINC000000205891	-8.7	443	-8.4	1286	-8.8	696	808.333
ZINC000000834044	-8.3	804	-8.8	767	-8.7	856	809
ZINC000000846901	-8.3	805	-8.8	768	-8.7	857	810
ZINC000031239902	-8.3	813	-8.8	776	-8.7	858	815.667
ZINC000010434758	-8.4	720	-8.6	1010	-8.8	721	817
ZINC000000388180	-8.3	816	-8.7	903	-8.8	735	818
ZINC000045130783	-8.3	770	-9.3	289	-8.3	1397	818.667
ZINC000004710851	-7.9	1350	-9.1	458	-8.9	648	818.667
ZINC000011865129	-8.4	709	-8.7	897	-8.7	851	819
ZINC000012901690	-8.5	613	-8.6	1002	-8.7	842	819
ZINC000085879196	-8.4	723	-8.6	1013	-8.8	722	819.333
ZINC000001140989	-9	196	-8.8	719	-8.2	1544	819.667
ZINC000035802400	-8.5	606	-8.7	889	-8.6	966	820.333
ZINC000000796549	-8.1	1043	-8.9	664	-8.8	756	821
ZINC000000526619	-8.2	986	-8.3	1450	-10	29	821.667
ZINC000000060717	-8.5	615	-8.5	1139	-8.8	714	822.667
ZINC000072324853	-7.9	1361	-9	566	-9	541	822.667
ZINC000000226663	-8.1	1025	-9.3	295	-8.5	1153	824.333
ZINC000012895461	-8	1224	-8.8	807	-9.1	443	824.667
ZINC000096834554	-8.3	827	-8.7	914	-8.8	736	825.667
ZINC000004028582	-8.5	619	-8.5	1143	-8.8	715	825.667
ZINC000027667725	-8.1	1027	-9.3	297	-8.5	1154	826
ZINC000000287711	-8.1	1060	-8.8	787	-8.9	633	826.667
ZINC000014891020	-8.2	940	-8.7	919	-8.9	628	829
ZINC000040310026	-8.3	841	-8.6	1027	-8.9	619	829
ZINC000027667836	-8.1	1057	-8.9	678	-8.8	757	830.667
ZINC000008879751	-8.2	966	-8.5	1177	-9.2	350	831
ZINC000005203961	-8.1	1067	-8.8	794	-8.9	634	831.667
ZINC000000790601	-8.8	364	-8.2	1558	-8.9	579	833.667
ZINC000000567111	-8.5	625	-8.4	1291	-8.9	602	839.333
ZINC000002927518	-8.9	275	-8.3	1425	-8.7	819	839.667
ZINC000000129501	-8.6	529	-8.4	1289	-8.8	702	840
ZINC000001388104	-8.5	627	-8.4	1293	-8.9	603	841
ZINC000000645844	-8	1267	-8.5	1209	-9.9	47	841
ZINC000000312499	-8.7	438	-8.5	1131	-8.6	956	841.667
ZINC000038746550	-8.3	856	-8.5	1164	-9	515	845
ZINC000085877114	-8.3	857	-8.5	1165	-9	516	846
ZINC000006428244	-8	1205	-9.1	455	-8.7	886	848.667
ZINC000040313052	-8.5	566	-9.1	434	-8.2	1549	849.667
ZINC000006702896	-8.2	963	-8.5	1174	-9.1	429	855.333
ZINC000030654091	-8.3	812	-8.8	775	-8.6	985	857.333
ZINC000000301757	-8.4	715	-8.6	1005	-8.7	852	857.333
ZINC000006658756	-8.5	610	-8.6	999	-8.6	967	858.667
ZINC000002708392	-8.3	818	-8.7	905	-8.7	859	860.667
ZINC000003020051	-8.5	593	-8.8	755	-8.4	1237	861.667
ZINC000036370039	-8.5	614	-8.6	1003	-8.6	968	861.667
ZINC000032124189	-8.4	712	-8.7	900	-8.6	975	862.333
ZINC000003117429	-8.5	594	-8.8	756	-8.4	1238	862.667
ZINC000036369859	-8.4	713	-8.7	901	-8.6	976	863.333
ZINC000004487700	-8.1	1049	-8.9	670	-8.7	871	863.333
ZINC000009085200	-7.9	1353	-9.1	461	-8.8	776	863.333
ZINC000006942805	-8.1	1051	-8.9	672	-8.7	872	865
ZINC000003897007	-8.8	362	-8.4	1285	-8.6	951	866
ZINC000000940063	-8	1194	-9.2	379	-8.6	1029	867.333
ZINC000012901520	-7.8	1556	-8.9	696	-9.2	353	868.333
ZINC000021175073	-8.1	1056	-8.9	677	-8.7	873	868.667
ZINC000004084926	-8.5	620	-8.5	1144	-8.7	843	869
ZINC000000433184	-8.1	1061	-8.8	788	-8.8	758	869
ZINC000022468380	-8.5	622	-8.5	1146	-8.7	844	870.667
ZINC000023973405	-8.5	623	-8.5	1147	-8.7	845	871.667
ZINC000005163216	-8.2	950	-8.6	1040	-8.9	629	873
ZINC000072324874	-8.5	608	-8.7	891	-8.5	1121	873.333
ZINC000017917305	-9.2	106	-8.3	1423	-8.5	1092	873.667
ZINC000000139058	-8.6	526	-8.5	1136	-8.6	959	873.667
ZINC000004691218	-8.6	513	-8.7	876	-8.4	1235	874.667
ZINC000027749413	-7.8	1539	-9.5	174	-8.7	911	874.667
ZINC000000811636	-8.3	849	-8.5	1157	-8.9	620	875.333
ZINC000006122773	-8.6	520	-8.6	992	-8.5	1117	876.333
ZINC000000872109	-8.3	850	-8.5	1158	-8.9	621	876.333
ZINC000000851782	-8.1	1031	-9.1	449	-8.5	1155	878.333
ZINC000008014216	-8.9	276	-8.3	1426	-8.6	943	881.667
ZINC000000381091	-8.9	271	-8.4	1280	-8.5	1098	883
ZINC000003898361	-8.9	278	-8.1	1694	-8.8	677	883
ZINC000023973566	-8	1193	-9.3	302	-8.5	1163	886
ZINC000002213629	-8.4	746	-8.2	1567	-9.2	345	886
ZINC000000898099	-7.8	1541	-9.1	465	-8.9	654	886.667
ZINC000006736835	-8	1215	-8.9	680	-8.8	766	887
ZINC000035485099	-7.8	1548	-9	571	-9	544	887.667
ZINC000012390210	-7.8	1543	-9.1	467	-8.9	655	888.333
ZINC000003662054	-8.6	531	-8.3	1432	-8.8	703	888.667
ZINC000000064870	-8.1	1122	-8.4	1326	-9.4	221	889.667
ZINC000040310314	-8.1	1024	-9.4	231	-8.3	1417	890.667
ZINC000016985258	-8.5	639	-8.1	1700	-9.2	333	890.667
ZINC000023142687	-8.2	971	-8.5	1182	-9	522	891.667
ZINC000079191880	-8.2	974	-8.5	1185	-9	523	894
ZINC000020745249	-8.1	1100	-8.6	1058	-9	529	895.667
ZINC000014987932	-8.7	444	-8.4	1287	-8.6	957	896
ZINC000001776401	-7.9	1346	-9.3	304	-8.6	1042	897.333
ZINC000015721906	-7.9	1365	-8.9	686	-8.9	649	900
ZINC000000526760	-8.2	928	-8.8	778	-8.6	997	901
ZINC000004826940	-7.9	1351	-9.1	459	-8.7	895	901.667
ZINC000004090436	-8	1236	-8.7	939	-9	536	903.667
ZINC000032200440	-8.2	933	-8.8	783	-8.6	998	904.667
ZINC000000139296	-8.2	936	-8.7	915	-8.7	864	905
ZINC000013682180	-8.3	811	-8.8	774	-8.5	1133	906
ZINC000070666344	-8.2	935	-8.8	785	-8.6	999	906.333
ZINC000032124408	-8.3	823	-8.7	910	-8.6	986	906.333
ZINC000000185010	-8.1	1059	-8.8	786	-8.7	874	906.333
ZINC000008014217	-9	202	-8.3	1424	-8.5	1095	907
ZINC000000852673	-8.1	1045	-8.9	666	-8.6	1010	907
ZINC000000790595	-8.5	600	-8.7	883	-8.4	1239	907.333
ZINC000010146618	-8.2	939	-8.7	918	-8.7	865	907.333
ZINC000000973911	-8.1	1046	-8.9	667	-8.6	1011	908
ZINC000000253114	-8.2	944	-8.6	1034	-8.8	747	908.333
ZINC000000075063	-7.9	1369	-8.8	814	-9	542	908.333
ZINC000001164955	-8.4	706	-8.7	894	-8.5	1127	909
ZINC000001831688	-8.1	1047	-8.9	668	-8.6	1012	909
ZINC000056452804	-8.2	941	-8.7	920	-8.7	866	909
ZINC000085875067	-8.2	925	-8.9	661	-8.5	1142	909.333
ZINC000000117162	-7.9	1370	-8.8	815	-9	543	909.333
ZINC000064818391	-8	1244	-8.7	947	-9	537	909.333
ZINC000002125178	-8.4	707	-8.7	895	-8.5	1128	910
ZINC000065248888	-8.3	842	-8.6	1028	-8.7	860	910
ZINC000008917443	-8.4	708	-8.7	896	-8.5	1129	911
ZINC000005184167	-8.1	1050	-8.9	671	-8.6	1013	911.333
ZINC000004162883	-8.1	1066	-8.8	793	-8.7	875	911.333
ZINC000002851302	-8.2	948	-8.6	1038	-8.8	748	911.333
ZINC000008916953	-8.5	612	-8.6	1001	-8.5	1122	911.667
ZINC000008764462	-8.3	869	-8.3	1445	-9.1	421	911.667
ZINC000000224861	-8.3	846	-8.5	1154	-8.8	737	912.333
ZINC000017911588	-8.4	710	-8.7	898	-8.5	1130	912.667
ZINC000008764721	-8.1	1052	-8.9	673	-8.6	1014	913
ZINC000017911472	-8.1	1068	-8.8	795	-8.7	876	913
ZINC000000077337	-7.8	1558	-8.8	827	-9.2	354	913
ZINC000000674222	-8.3	848	-8.5	1156	-8.8	738	914
ZINC000009095536	-8.1	1054	-8.9	675	-8.6	1015	914.667
ZINC000004550514	-8.6	519	-8.6	991	-8.4	1236	915.333
ZINC000000951037	-8.8	361	-8.4	1284	-8.5	1103	916
ZINC000000041471	-7.9	1390	-8.6	1077	-9.3	283	916.667
ZINC000001115949	-8.3	852	-8.5	1160	-8.8	739	917
ZINC000035363889	-8.1	1058	-8.9	679	-8.6	1016	917.667
ZINC000002960168	-8.1	1080	-8.7	927	-8.8	759	922
ZINC000020762095	-8	1274	-8.5	1216	-9.3	281	923.667
ZINC000001140988	-8.6	527	-8.5	1137	-8.5	1118	927.333
ZINC000001635386	-9.1	166	-8	1806	-8.7	810	927.333
ZINC000006662507	-8.9	273	-8.4	1282	-8.4	1229	928
ZINC000002332533	-8.3	859	-8.4	1308	-8.9	622	929.667
ZINC000000129499	-8	1208	-9	554	-8.6	1030	930.667
ZINC000000029950	-8.6	530	-8.3	1431	-8.7	833	931.333
ZINC000004933099	-8	1222	-8.8	805	-8.8	767	931.333
ZINC000018203176	-8	1287	-8.4	1347	-9.5	160	931.333
ZINC000217656476	-8.6	509	-8.8	751	-8.2	1547	935.667
ZINC000027667724	-8	1228	-8.8	811	-8.8	768	935.667
ZINC000002927553	-8	1234	-8.7	937	-8.9	641	937.333
ZINC000000790591	-7.9	1357	-9	562	-8.7	896	938.333
ZINC000004815800	-7.7	1696	-8.8	835	-9.3	287	939.333
ZINC000032124320	-7.9	1360	-9	565	-8.7	897	940.667
ZINC000006736815	-8	1239	-8.7	942	-8.9	642	941
ZINC000000626395	-8.1	1106	-8.5	1190	-9	530	942
ZINC000000029936	-8.3	828	-8.6	1014	-8.6	987	943
ZINC000020889873	-7.9	1366	-8.9	687	-8.8	777	943.333
ZINC000064568272	-8	1243	-8.7	946	-8.9	643	944
ZINC000000121705	-8.3	831	-8.6	1017	-8.6	988	945.333
ZINC000008764735	-8	1271	-8.5	1213	-9.2	352	945.333
ZINC000062001856	-9.4	58	-8.1	1690	-8.5	1091	946.333
ZINC000000265221	-8.3	833	-8.6	1019	-8.6	989	947
ZINC000000872106	-8.4	705	-8.7	893	-8.4	1246	948
ZINC000033171326	-8.4	756	-8	1816	-9.3	273	948.333
ZINC000001177436	-8.4	698	-8.8	760	-8.3	1388	948.667
ZINC000021114899	-8.1	1117	-8.5	1201	-9	531	949.667
ZINC000008276825	-8.3	837	-8.6	1023	-8.6	990	950
ZINC000002130040	-8.2	929	-8.8	779	-8.5	1143	950.333
ZINC000000308124	-8.3	815	-8.7	902	-8.5	1134	950.333
ZINC000000789521	-8	1186	-9.4	232	-8.3	1434	950.667
ZINC000012063020	-8.2	930	-8.8	780	-8.5	1144	951.333
ZINC000001061006	-8.2	938	-8.7	917	-8.6	1000	951.667
ZINC000057419387	-7.9	1381	-8.8	826	-8.9	650	952.333
ZINC000007005316	-8.1	1022	-9.6	139	-8.1	1697	952.667
ZINC000006170743	-8.1	1038	-9	549	-8.4	1273	953.333
ZINC000006660179	-8.1	1039	-9	550	-8.4	1274	954.333
ZINC000021798708	-8.8	359	-8.5	1129	-8.3	1376	954.667
ZINC000001253313	-8	1196	-9.2	381	-8.4	1291	956
ZINC000000084013	-8.2	955	-8.5	1166	-8.8	749	956.667
ZINC000072325291	-8.3	826	-8.7	913	-8.5	1135	958
ZINC000041296414	-8	1200	-9.2	385	-8.4	1292	959
ZINC000000121860	-7.5	1956	-9.1	473	-9.1	448	959
ZINC000000718336	-8.1	1077	-8.7	924	-8.7	877	959.333
ZINC000000189406	-8.5	616	-8.5	1140	-8.5	1123	959.667
ZINC000000288369	-8.5	617	-8.5	1141	-8.5	1124	960.667
ZINC000009668499	-7.5	1958	-9.1	475	-9.1	449	960.667
ZINC000002927642	-8.1	1079	-8.7	926	-8.7	878	961
ZINC000020762090	-8.1	1070	-8.8	797	-8.6	1017	961.333
ZINC000031948984	-8.5	628	-8.4	1294	-8.6	969	963.667
ZINC000003645863	-8.4	683	-9	526	-8.1	1685	964.667
ZINC000005194973	-7.8	1544	-9	567	-8.8	784	965
ZINC000079189063	-8.5	630	-8.4	1296	-8.6	970	965.333
ZINC000019897819	-8.4	744	-8.3	1441	-8.8	723	969.333
ZINC000003598839	-8	1220	-8.8	803	-8.7	887	970
ZINC000005347408	-8	1223	-8.8	806	-8.7	888	972.333
ZINC000075550723	-8.1	1101	-8.6	1059	-8.8	760	973.333
ZINC000000263599	-7.7	1692	-9	573	-8.9	658	974.333
ZINC000015721863	-8	1226	-8.8	809	-8.7	889	974.667
ZINC000036370067	-8.6	532	-8.3	1433	-8.6	960	975
ZINC000008916786	-8	1216	-8.9	681	-8.6	1031	976
ZINC000101453177	-8.6	534	-8.2	1562	-8.7	834	976.667
ZINC000011865976	-8.9	274	-8.4	1283	-8.3	1374	977
ZINC000008739329	-8.6	505	-8.8	747	-8.1	1682	978
ZINC000000978483	-8.1	1108	-8.5	1192	-8.9	635	978.333
ZINC000000263653	-7.9	1362	-8.9	683	-8.7	898	981
ZINC000002219639	-7.9	1449	-8.3	1481	-10.2	15	981.667
ZINC000005179869	-8	1237	-8.7	940	-8.8	769	982
ZINC000003117430	-7.6	1829	-9	574	-9	549	984
ZINC000000339819	-8	1248	-8.6	1062	-8.9	644	984.667
ZINC000008916787	-7.9	1358	-9	563	-8.6	1043	988
ZINC000001593750	-8.4	716	-8.6	1006	-8.4	1247	989.667
ZINC000005347406	-8	1255	-8.6	1069	-8.9	645	989.667
ZINC000002760562	-7.9	1374	-8.8	819	-8.8	778	990.333
ZINC000001782741	-8.4	717	-8.6	1007	-8.4	1248	990.667
ZINC000009776584	-8.2	918	-8.9	654	-8.3	1405	992.333
ZINC000016705926	-7.9	1380	-8.8	825	-8.8	779	994.667
ZINC000015867426	-8.3	821	-8.7	908	-8.4	1256	995
ZINC000002112713	-8.2	947	-8.6	1037	-8.6	1001	995
ZINC000000257787	-8.3	832	-8.6	1018	-8.5	1136	995.333
ZINC000006942858	-8.7	447	-8.3	1429	-8.5	1110	995.333
ZINC000019897823	-8.7	448	-8.3	1430	-8.5	1111	996.333
ZINC000004933305	-8.2	949	-8.6	1039	-8.6	1002	996.667
ZINC000031239566	-7.5	1955	-9.4	236	-8.8	799	996.667
ZINC000027794415	-7.9	1355	-9.1	463	-8.5	1174	997.333
ZINC000000253439	-8.3	847	-8.5	1155	-8.6	991	997.667
ZINC000011689918	-7.7	1687	-9.2	386	-8.7	920	997.667
ZINC000006700718	-8.3	836	-8.6	1022	-8.5	1137	998.333
ZINC000015721882	-8.3	838	-8.6	1024	-8.5	1138	1000
ZINC000082138167	-8.2	954	-8.6	1044	-8.6	1003	1000.33
ZINC000000662309	-8.4	725	-8.5	1149	-8.5	1131	1001.67
ZINC000065248707	-8.3	801	-8.9	648	-8.2	1557	1002
ZINC000020889869	-8.1	1055	-8.9	676	-8.4	1275	1002
ZINC000008916954	-8.4	735	-8.4	1302	-8.6	977	1004.67
ZINC000013534584	-8.4	701	-8.8	763	-8.2	1551	1005
ZINC000020427677	-8.2	969	-8.5	1180	-8.7	867	1005.33
ZINC000000970804	-8.1	1091	-8.6	1049	-8.7	879	1006.33
ZINC000006660177	-7.8	1545	-9	568	-8.7	912	1008.33
ZINC000000526252	-8.8	355	-8.5	1125	-8.2	1546	1008.67
ZINC000035514690	-8.1	1084	-8.7	931	-8.6	1018	1011
ZINC000010434760	-8.4	743	-8.3	1440	-8.7	853	1012
ZINC000217689178	-8.1	1086	-8.7	933	-8.6	1019	1012.67
ZINC000000057384	-8.5	624	-8.4	1290	-8.5	1125	1013
ZINC000191005053	-8.3	865	-8.4	1314	-8.7	861	1013.33
ZINC000012296849	-8.4	749	-8.2	1570	-8.8	724	1014.33
ZINC000008613762	-8.2	978	-8.4	1319	-8.8	750	1015.67
ZINC000000139294	-8.1	1102	-8.5	1186	-8.8	761	1016.33
ZINC000021095335	-8.2	983	-8.4	1324	-8.8	751	1019.33
ZINC000016753972	-8.6	522	-8.6	994	-8.2	1548	1021.33
ZINC000031437095	-8	1213	-9	559	-8.4	1293	1021.67
ZINC000015721861	-8	1225	-8.8	808	-8.6	1032	1021.67
ZINC000004000394	-8.1	1110	-8.5	1194	-8.8	762	1022
ZINC000002340369	-8.2	987	-8.3	1451	-8.9	630	1022.67
ZINC000062001786	-8.9	279	-8.1	1695	-8.5	1099	1024.33
ZINC000032124524	-8	1242	-8.7	945	-8.7	890	1025.67
ZINC000072324910	-8	1245	-8.7	948	-8.7	891	1028
ZINC000001383820	-8	1250	-8.6	1064	-8.8	770	1028
ZINC000000790603	-7.9	1372	-8.8	817	-8.7	899	1029.33
ZINC000049679127	-7.9	1441	-8.4	1369	-9.3	284	1031.33
ZINC000005347522	-7.9	1376	-8.8	821	-8.7	900	1032.33
ZINC000008765080	-8	1256	-8.6	1070	-8.8	771	1032.33
ZINC000008917213	-7.9	1359	-9	564	-8.5	1175	1032.67
ZINC000027794412	-7.9	1367	-8.9	688	-8.6	1044	1033
ZINC000000051478	-8.3	829	-8.6	1015	-8.4	1257	1033.67
ZINC000060349748	-8	1260	-8.6	1074	-8.8	772	1035.33
ZINC000000200919	-8.4	714	-8.6	1004	-8.3	1389	1035.67
ZINC000065248720	-8	1261	-8.6	1075	-8.8	773	1036.33
ZINC000002147553	-8.3	834	-8.6	1020	-8.4	1258	1037.33
ZINC000001831994	-7.9	1384	-8.7	951	-8.8	780	1038.33
ZINC000004487694	-8.4	718	-8.6	1008	-8.3	1390	1038.67
ZINC000000489352	-8.2	937	-8.7	916	-8.4	1265	1039.33
ZINC000027667710	-8.3	840	-8.6	1026	-8.4	1259	1041.67
ZINC000023973569	-8.4	727	-8.5	1151	-8.4	1249	1042.33
ZINC000000265224	-8.2	956	-8.5	1167	-8.6	1004	1042.33
ZINC000034651227	-8.4	728	-8.5	1152	-8.4	1250	1043.33
ZINC000009224897	-8	1272	-8.5	1214	-8.9	646	1044
ZINC000036369940	-8.3	825	-8.7	912	-8.3	1398	1045
ZINC000020427682	-8.1	1069	-8.8	796	-8.4	1276	1047
ZINC000006767783	-8.2	964	-8.5	1175	-8.6	1005	1048
ZINC000065248685	-8.2	924	-8.9	660	-8.2	1562	1048.67
ZINC000000030016	-8.1	1087	-8.6	1045	-8.6	1020	1050.67
ZINC000000422917	-7.8	1550	-8.9	690	-8.7	913	1051
ZINC000005345416	-8.3	854	-8.5	1162	-8.5	1139	1051.67
ZINC000000093238	-8.4	740	-8.3	1437	-8.6	978	1051.67
ZINC000000434185	-7.8	1551	-8.9	691	-8.7	914	1052
ZINC000000265220	-8.3	858	-8.4	1307	-8.6	992	1052.33
ZINC000002432176	-7.9	1451	-8.3	1483	-9.4	224	1052.67
ZINC000002027915	-7.8	1553	-8.9	693	-8.7	915	1053.67
ZINC000032123933	-8.2	973	-8.5	1184	-8.6	1006	1054.33
ZINC000040310012	-8.5	629	-8.4	1295	-8.4	1240	1054.67
ZINC000012062834	-8.1	1081	-8.7	928	-8.5	1156	1055
ZINC000004743330	-8.1	1093	-8.6	1051	-8.6	1021	1055
ZINC000032540773	-8.4	745	-8.3	1442	-8.6	979	1055.33
ZINC000018266194	-9.2	107	-8.1	1691	-8.3	1369	1055.67
ZINC000004743646	-8.1	1094	-8.6	1052	-8.6	1022	1056
ZINC000006917892	-8.3	863	-8.4	1312	-8.6	993	1056
ZINC000016626252	-8.2	980	-8.4	1321	-8.7	868	1056.33
ZINC000027749442	-8.1	1083	-8.7	930	-8.5	1157	1056.67
ZINC000006624204	-8.1	1095	-8.6	1053	-8.6	1023	1057
ZINC000070666507	-8.3	864	-8.4	1313	-8.6	994	1057
ZINC000000869721	-7.8	1559	-8.8	828	-8.8	785	1057.33
ZINC000008765339	-8.1	1097	-8.6	1055	-8.6	1024	1058.67
ZINC000004409957	-8	1221	-8.8	804	-8.5	1164	1063
ZINC000000455859	-8.3	875	-8.2	1575	-8.8	740	1063.33
ZINC000005034242	-8.6	535	-8.1	1697	-8.6	961	1064.33
ZINC000012377443	-8.5	632	-8.3	1436	-8.5	1126	1064.67
ZINC000000149852	-8.9	277	-8.1	1693	-8.4	1230	1066.67
ZINC000001318428	-7.8	1571	-8.6	1088	-9	545	1068
ZINC000032491914	-8	1229	-8.8	812	-8.5	1165	1068.67
ZINC000003493707	-8	1235	-8.7	938	-8.6	1033	1068.67
ZINC000004661567	-8	1253	-8.6	1067	-8.7	892	1070.67
ZINC000011865975	-8.1	1021	-10	45	-7.7	2149	1071.67
ZINC000021932812	-7.5	1962	-8.9	703	-9	552	1072.33
ZINC000000626451	-8.1	1127	-8.4	1331	-8.8	763	1073.67
ZINC000000774899	-7.9	1356	-9	561	-8.4	1305	1074
ZINC000000263687	-7.9	1371	-8.8	816	-8.6	1045	1077.33
ZINC000001230614	-8.1	1138	-8.3	1458	-8.9	636	1077.33
ZINC000000051235	-8	1201	-9.1	451	-8.2	1582	1078
ZINC000001326078	-7.9	1373	-8.8	818	-8.6	1046	1079
ZINC000000085855	-8.2	942	-8.6	1032	-8.4	1266	1080
ZINC000027662187	-7.9	1388	-8.7	955	-8.7	901	1081.33
ZINC000006766255	-7.9	1377	-8.8	822	-8.6	1047	1082
ZINC000006767084	-7.9	1378	-8.8	823	-8.6	1048	1083
ZINC000017911473	-7.9	1439	-8.4	1367	-9.1	444	1083.33
ZINC000006661189	-8.2	917	-8.9	653	-8.1	1691	1087
ZINC000070666587	-8.2	953	-8.6	1043	-8.4	1267	1087.67
ZINC000000051236	-8.1	1074	-8.7	921	-8.4	1277	1090.67
ZINC000000487469	-8.2	958	-8.5	1169	-8.5	1145	1090.67
ZINC000001076066	-8.1	1064	-8.8	791	-8.3	1418	1091
ZINC000000489425	-8.2	959	-8.5	1170	-8.5	1146	1091.67
ZINC000000319500	-8.4	730	-8.4	1297	-8.4	1251	1092.67
ZINC000005960296	-8.4	733	-8.4	1300	-8.4	1252	1095
ZINC000008490996	-8.2	965	-8.5	1176	-8.5	1147	1096
ZINC000022766654	-7.3	2215	-8.8	850	-9.4	226	1097
ZINC000000486262	-8.1	1089	-8.6	1047	-8.5	1158	1098
ZINC000000818841	-8.5	631	-8.3	1435	-8.4	1241	1102.33
ZINC000003038242	-8.5	638	-8.1	1699	-8.6	971	1102.67
ZINC000000200908	-7.8	1565	-8.7	957	-8.8	786	1102.67
ZINC000019720438	-8.2	982	-8.4	1323	-8.6	1007	1104
ZINC000004821016	-8.3	862	-8.4	1311	-8.5	1140	1104.33
ZINC000253401654	-8.3	866	-8.4	1315	-8.5	1141	1107.33
ZINC000000779530	-8.2	994	-8.2	1581	-8.8	752	1109
ZINC000019902223	-7.6	1830	-8.9	700	-8.8	798	1109.33
ZINC000000645767	-7.8	1540	-9.1	464	-8.4	1325	1109.67
ZINC000027667712	-8	1227	-8.8	810	-8.4	1294	1110.33
ZINC000000626078	-8	1231	-8.7	934	-8.5	1166	1110.33
ZINC000006661639	-8.1	1111	-8.5	1195	-8.6	1025	1110.33
ZINC000075437336	-8	1230	-8.8	813	-8.4	1295	1112.67
ZINC000018157712	-8.1	1115	-8.5	1199	-8.6	1026	1113.33
ZINC000006623933	-8	1238	-8.7	941	-8.5	1167	1115.33
ZINC000001459963	-8	1251	-8.6	1065	-8.6	1034	1116.67
ZINC000005960278	-8	1211	-9	557	-8.2	1583	1117
ZINC000012383592	-7.6	1838	-8.7	970	-9	550	1119.33
ZINC000000273797	-7.8	1577	-8.5	1243	-9	546	1122
ZINC000027667629	-8	1259	-8.6	1073	-8.6	1035	1122.33
ZINC000000893203	-7.6	1828	-9.1	472	-8.6	1072	1124
ZINC000000117038	-7.9	1392	-8.6	1079	-8.7	902	1124.33
ZINC000000851758	-7.9	1394	-8.6	1081	-8.7	903	1126
ZINC000000168970	-8.2	943	-8.6	1033	-8.3	1406	1127.33
ZINC000004880450	-7.9	1396	-8.6	1083	-8.7	904	1127.67
ZINC000001132058	-8.7	449	-8.2	1559	-8.3	1380	1129.33
ZINC000021095319	-7.9	1387	-8.7	954	-8.6	1049	1130
ZINC000072326144	-8.7	451	-8.2	1561	-8.3	1381	1131
ZINC000001730671	-8.2	960	-8.5	1171	-8.4	1268	1133
ZINC000019897919	-8.2	952	-8.6	1042	-8.3	1407	1133.67
ZINC000000978484	-8.3	851	-8.5	1159	-8.3	1399	1136.33
ZINC000096116098	-8.1	1161	-8.1	1718	-9	532	1137
ZINC000008765053	-7.8	1591	-8.4	1375	-9.1	447	1137.67
ZINC000000202241	-8.1	1075	-8.7	922	-8.3	1419	1138.67
ZINC000000528977	-8.1	1090	-8.6	1048	-8.4	1278	1138.67
ZINC000019897829	-8.2	968	-8.5	1179	-8.4	1269	1138.67
ZINC000035514688	-8.3	855	-8.5	1163	-8.3	1400	1139.33
ZINC000000466323	-8.4	731	-8.4	1298	-8.3	1391	1140
ZINC000020763527	-8.2	970	-8.5	1181	-8.4	1270	1140.33
ZINC000021911910	-8.3	839	-8.6	1025	-8.2	1558	1140.67
ZINC000020622823	-7.9	1413	-8.5	1234	-8.8	781	1142.67
ZINC000006947183	-8.1	1096	-8.6	1054	-8.4	1279	1143
ZINC000004731619	-8.3	861	-8.4	1310	-8.4	1260	1143.67
ZINC000002130508	-8.4	741	-8.3	1438	-8.4	1253	1144
ZINC000085877063	-8.3	844	-8.6	1030	-8.2	1559	1144.33
ZINC000095348656	-8.4	738	-8.4	1305	-8.3	1392	1145
ZINC000001158461	-7.8	1552	-8.9	692	-8.5	1191	1145
ZINC000019897920	-8.4	753	-8.1	1703	-8.6	980	1145.33
ZINC000064677375	-8.1	1085	-8.7	932	-8.3	1420	1145.67
ZINC000005034266	-8.8	365	-8.1	1696	-8.3	1377	1146
ZINC000000049207	-8.5	633	-8.2	1563	-8.4	1242	1146
ZINC000004783178	-7.8	1566	-8.7	958	-8.7	916	1146.67
ZINC000004743677	-8.2	976	-8.4	1317	-8.5	1148	1147
ZINC000012371690	-8.5	635	-8.2	1565	-8.4	1243	1147.67
ZINC000008613760	-8.2	977	-8.4	1318	-8.5	1149	1148
ZINC000027793098	-7.8	1569	-8.7	961	-8.7	917	1149
ZINC000065248684	-8.2	990	-8.3	1454	-8.6	1008	1150.67
ZINC000008843814	-7.8	1574	-8.6	1091	-8.8	787	1150.67
ZINC000012896650	-7.9	1437	-8.4	1365	-8.9	651	1151
ZINC000000037926	-8	1218	-8.8	801	-8.3	1435	1151.33
ZINC000035485066	-8.2	999	-8.2	1586	-8.7	869	1151.33
ZINC000056452575	-7.8	1575	-8.6	1092	-8.8	788	1151.67
ZINC000002927573	-8.1	1109	-8.5	1193	-8.5	1159	1153.67
ZINC000001067102	-8	1232	-8.7	935	-8.4	1296	1154.33
ZINC000000050302	-7.5	1963	-8.8	843	-8.9	659	1155
ZINC000002380283	-8	1233	-8.7	936	-8.4	1297	1155.33
ZINC000000030032	-8	1246	-8.6	1060	-8.5	1168	1158
ZINC000000782969	-8.1	1137	-8.3	1457	-8.7	880	1158
ZINC000000058775	-8	1247	-8.6	1061	-8.5	1169	1159
ZINC000016192612	-8	1240	-8.7	943	-8.4	1298	1160.33
ZINC000006945838	-8.1	1142	-8.3	1462	-8.7	881	1161.67
ZINC000003908306	-8	1252	-8.6	1066	-8.5	1170	1162.67
ZINC000004487666	-8.1	1131	-8.4	1335	-8.6	1027	1164.33
ZINC000027662042	-8.1	1147	-8.3	1467	-8.7	882	1165.33
ZINC000001428655	-7.7	1690	-9.1	470	-8.4	1338	1166
ZINC000005157016	-7.9	1375	-8.8	820	-8.4	1306	1167
ZINC000000643416	-7.9	1344	-9.7	100	-7.8	2059	1167.67
ZINC000006767483	-7.9	1385	-8.7	952	-8.5	1176	1171
ZINC000020721992	-7.8	1594	-8.4	1378	-9	547	1173
ZINC000000851757	-7.9	1393	-8.6	1080	-8.6	1050	1174.33
ZINC000009419283	-7.9	1354	-9.1	462	-8.1	1716	1177.33
ZINC000004880505	-7.9	1397	-8.6	1084	-8.6	1051	1177.33
ZINC000000465744	-8.2	957	-8.5	1168	-8.3	1408	1177.67
ZINC000002882062	-8.2	961	-8.5	1172	-8.3	1409	1180.67
ZINC000000434716	-8.2	945	-8.6	1035	-8.2	1563	1181
ZINC000020761521	-7.9	1414	-8.5	1235	-8.7	905	1184.67
ZINC000000271688	-8.1	1088	-8.6	1046	-8.3	1421	1185
ZINC000062005039	-8	1304	-8.2	1604	-8.9	647	1185
ZINC000012063019	-8.2	951	-8.6	1041	-8.2	1564	1185.33
ZINC000002864603	-8.1	1092	-8.6	1050	-8.3	1422	1188
ZINC000096222257	-7.9	1420	-8.5	1241	-8.7	906	1189
ZINC000008990766	-8.2	979	-8.4	1320	-8.4	1271	1190
ZINC000062001442	-8.4	750	-8.2	1571	-8.4	1254	1191.67
ZINC000012895148	-7.8	1555	-8.9	695	-8.4	1326	1192
ZINC000000851801	-8.1	1078	-8.7	925	-8.2	1574	1192.33
ZINC000012901525	-8.3	880	-8.1	1706	-8.6	995	1193.67
ZINC000000167142	-8.2	984	-8.3	1448	-8.5	1150	1194
ZINC000006755479	-8.3	796	-8.9	643	-7.7	2146	1195
ZINC000000953723	-8.2	995	-8.2	1582	-8.6	1009	1195.33
ZINC000005322696	-7.8	1568	-8.7	960	-8.6	1059	1195.67
ZINC000016849161	-8.3	798	-8.9	645	-7.7	2147	1196.67
ZINC000040313312	-8.4	736	-8.4	1303	-8.2	1552	1197
ZINC000013570997	-8.1	1114	-8.5	1198	-8.4	1280	1197.33
ZINC000002989570	-7.7	1695	-8.8	834	-8.6	1064	1197.67
ZINC000027662049	-7.7	1694	-8.9	699	-8.5	1202	1198.33
ZINC000079190036	-7.9	1443	-8.4	1371	-8.8	782	1198.67
ZINC000008917444	-7.6	1834	-8.8	842	-8.7	921	1199
ZINC000100305206	-8.4	739	-8.4	1306	-8.2	1553	1199.33
ZINC000049420906	-7.5	1969	-8.7	972	-8.9	660	1200.33
ZINC000027746404	-7.7	1700	-8.8	839	-8.6	1065	1201.33
ZINC000096114044	-8.1	1120	-8.5	1204	-8.4	1281	1201.67
ZINC000012296850	-7.7	1714	-8.6	1101	-8.8	792	1202.33
ZINC000003899577	-7.5	1965	-8.8	845	-8.8	800	1203.33
ZINC000002223842	-7.3	2212	-9.1	476	-8.7	927	1205
ZINC000004487689	-7.8	1581	-8.5	1247	-8.8	789	1205.67
ZINC000000235875	-8.1	1136	-8.3	1456	-8.6	1028	1206.67
ZINC000021911914	-8	1241	-8.7	944	-8.3	1436	1207
ZINC000004881007	-8	1254	-8.6	1068	-8.4	1299	1207
ZINC000000168652	-8.1	1151	-8.2	1589	-8.7	883	1207.67
ZINC000062001855	-8.7	453	-7.9	1937	-8.4	1234	1208
ZINC000021168734	-8.1	1133	-8.4	1337	-8.5	1160	1210
ZINC000000893196	-7.7	1689	-9.1	469	-8.3	1477	1211.67
ZINC000000170614	-7.9	1382	-8.7	949	-8.4	1307	1212.67
ZINC000000058774	-8	1263	-8.5	1205	-8.5	1171	1213
ZINC000217919943	-7.7	1691	-9.1	471	-8.3	1478	1213.33
ZINC000012446800	-8.7	452	-8	1807	-8.3	1382	1213.67
ZINC000000457423	-8	1266	-8.5	1208	-8.5	1172	1215.33
ZINC000044652242	-7.9	1368	-8.9	689	-8.2	1593	1216.67
ZINC000015721630	-7.9	1379	-8.8	824	-8.3	1453	1218.67
ZINC000000212487	-8	1281	-8.4	1341	-8.6	1036	1219.33
ZINC000027664000	-7.9	1398	-8.6	1085	-8.5	1177	1220
ZINC000028288167	-7.9	1399	-8.6	1086	-8.5	1178	1221
ZINC000000996226	-8.2	946	-8.6	1036	-8.1	1692	1224.67
ZINC000000203256	-7.9	1401	-8.5	1222	-8.6	1052	1225
ZINC000004062163	-8	1301	-8.2	1601	-8.8	774	1225.33
ZINC000000077299	-7.9	1422	-8.4	1350	-8.7	907	1226.33
ZINC000055253349	-8.1	1072	-8.8	799	-8	1815	1228.67
ZINC000016029211	-8.7	450	-8.2	1560	-8.1	1681	1230.33
ZINC000002927523	-8.5	642	-8	1810	-8.4	1244	1232
ZINC000001095603	-7.4	2094	-9.2	387	-8.5	1219	1233.33
ZINC000062001785	-8.5	644	-8	1812	-8.4	1245	1233.67
ZINC000000183749	-8.2	1007	-8	1824	-8.7	870	1233.67
ZINC000008487863	-7.9	1435	-8.4	1363	-8.7	908	1235.33
ZINC000000246205	-8.3	873	-8.2	1573	-8.4	1261	1235.67
ZINC000006947229	-8.4	747	-8.2	1568	-8.3	1393	1236
ZINC000040309257	-7.9	1417	-8.5	1238	-8.6	1053	1236
ZINC000012390160	-8.1	1082	-8.7	929	-8.1	1698	1236.33
ZINC000015423506	-8.2	967	-8.5	1178	-8.2	1565	1236.67
ZINC000012296847	-8.4	748	-8.2	1569	-8.3	1394	1237
ZINC000000294730	-8.1	1103	-8.5	1187	-8.3	1423	1237.67
ZINC000000290995	-8.3	868	-8.3	1444	-8.3	1401	1237.67
ZINC000023973401	-7.9	1440	-8.4	1368	-8.7	909	1239
ZINC000000489005	-8.1	1105	-8.5	1189	-8.3	1424	1239.33
ZINC000062001350	-8.3	870	-8.3	1446	-8.3	1402	1239.33
ZINC000004777225	-7.8	1561	-8.8	830	-8.4	1327	1239.33
ZINC000036370090	-7.8	1557	-8.9	697	-8.3	1467	1240.33
ZINC000000029911	-8.5	637	-8.1	1698	-8.3	1386	1240.33
ZINC000004867717	-7.8	1562	-8.8	831	-8.4	1328	1240.33
ZINC000000288797	-8.2	992	-8.2	1579	-8.5	1151	1240.67
ZINC000000790598	-8.1	1107	-8.5	1191	-8.3	1425	1241
ZINC000007608245	-7.8	1563	-8.8	832	-8.4	1329	1241.33
ZINC000008765178	-7.8	1564	-8.8	833	-8.4	1330	1242.33
ZINC000000253015	-7.8	1576	-8.5	1242	-8.7	918	1245.33
ZINC000027667631	-7.7	1699	-8.8	838	-8.5	1203	1246.67
ZINC000019897817	-8.1	1116	-8.5	1200	-8.3	1426	1247.33
ZINC000001140301	-8.1	1128	-8.4	1332	-8.4	1282	1247.33
ZINC000001770388	-8.1	1129	-8.4	1333	-8.4	1283	1248.33
ZINC000000073853	-7.6	1832	-8.8	840	-8.6	1073	1248.33
ZINC000021798703	-8.1	1118	-8.5	1202	-8.3	1427	1249
ZINC000004710854	-7.5	1973	-8.6	1113	-8.9	661	1249
ZINC000005205909	-7.8	1590	-8.4	1374	-8.8	790	1251.33
ZINC000002874610	-8.1	1139	-8.3	1459	-8.5	1161	1253
ZINC000000677522	-7.9	1363	-8.9	684	-8.1	1717	1254.67
ZINC000006677896	-8.1	1141	-8.3	1461	-8.5	1162	1254.67
ZINC000019872542	-8	1258	-8.6	1072	-8.3	1437	1255.67
ZINC000006759497	-7.8	1605	-8.3	1507	-8.9	656	1256
ZINC000000268344	-8	1264	-8.5	1206	-8.4	1300	1256.67
ZINC000001079435	-7.8	1615	-8.2	1622	-9	548	1261.67
ZINC000012062833	-8	1273	-8.5	1215	-8.4	1301	1263
ZINC000000815175	-8	1291	-8.3	1471	-8.6	1037	1266.33
ZINC000005395036	-8	1303	-8.2	1603	-8.7	893	1266.33
ZINC000034191060	-8	1294	-8.3	1474	-8.6	1038	1268.67
ZINC000001189611	-7.9	1405	-8.5	1226	-8.5	1179	1270
ZINC000008764927	-7.9	1410	-8.5	1231	-8.5	1180	1273.67
ZINC000079196745	-8.4	758	-8	1818	-8.4	1255	1277
ZINC000000318757	-8.2	985	-8.3	1449	-8.3	1410	1281.33
ZINC000000128748	-8.3	878	-8.1	1704	-8.4	1262	1281.33
ZINC000072325869	-8.5	645	-8	1813	-8.3	1387	1281.67
ZINC000031035874	-8.2	972	-8.5	1183	-8.1	1693	1282.67
ZINC000011535882	-8.4	752	-8.1	1702	-8.3	1395	1283
ZINC000000303350	-8.3	874	-8.2	1574	-8.3	1403	1283.67
ZINC000048375995	-8.3	882	-8.1	1708	-8.4	1263	1284.33
ZINC000008917446	-7.9	1436	-8.4	1364	-8.6	1054	1284.67
ZINC000006767083	-7.8	1573	-8.6	1090	-8.5	1192	1285
ZINC000004472972	-8.3	860	-8.4	1309	-8.1	1688	1285.67
ZINC000001848107	-8.2	975	-8.4	1316	-8.2	1566	1285.67
ZINC000006756093	-8.5	648	-7.6	2243	-8.6	972	1287.67
ZINC000020610098	-7.9	1462	-8.3	1494	-8.7	910	1288.67
ZINC000002811830	-8.4	742	-8.3	1439	-8.1	1686	1289
ZINC000001831993	-7.7	1707	-8.6	1094	-8.6	1066	1289
ZINC000016753975	-8.2	981	-8.4	1322	-8.2	1567	1290
ZINC000070666405	-8.2	1005	-8.1	1714	-8.5	1152	1290.33
ZINC000004933309	-7.9	1364	-8.9	685	-8	1825	1291.33
ZINC000000053903	-7.6	1835	-8.7	967	-8.6	1074	1292
ZINC000072326105	-7.9	1489	-8.1	1736	-8.9	652	1292.33
ZINC000065248723	-8.3	871	-8.3	1447	-8.2	1560	1292.67
ZINC000000077536	-8.1	1123	-8.4	1327	-8.3	1428	1292.67
ZINC000008782368	-8.5	634	-8.2	1564	-8.1	1683	1293.67
ZINC000000851764	-7.6	1837	-8.7	969	-8.6	1075	1293.67
ZINC000002829673	-7.6	1833	-8.8	841	-8.5	1208	1294
ZINC000000303965	-7.5	1959	-9	575	-8.4	1349	1294.33
ZINC000019897885	-7.7	1715	-8.6	1102	-8.6	1067	1294.67
ZINC000072325608	-8.1	1170	-8	1832	-8.7	884	1295.33
ZINC000000274151	-7.8	1599	-8.3	1501	-8.8	791	1297
ZINC000000464304	-7.8	1614	-8.2	1621	-8.9	657	1297.33
ZINC000065248698	-8.1	1134	-8.4	1338	-8.3	1429	1300.33
ZINC000000303635	-8	1265	-8.5	1207	-8.3	1438	1303.33
ZINC000009379650	-8	1257	-8.6	1071	-8.2	1584	1304
ZINC000057419992	-7.7	1733	-8.4	1389	-8.8	793	1305
ZINC000074715541	-7.9	1512	-7.9	1963	-9.1	445	1306.67
ZINC000096222339	-8	1262	-8.6	1076	-8.2	1585	1307.67
ZINC000000043912	-7.9	1391	-8.6	1078	-8.3	1454	1307.67
ZINC000000779539	-8	1315	-8	1836	-8.8	775	1308.67
ZINC000000709970	-8.1	1076	-8.7	923	-7.9	1930	1309.67
ZINC000027581500	-8	1275	-8.5	1217	-8.3	1439	1310.33
ZINC000004409962	-7.9	1395	-8.6	1082	-8.3	1455	1310.67
ZINC000006947032	-7.9	1386	-8.7	953	-8.2	1594	1311
ZINC000000824756	-7.9	1403	-8.5	1224	-8.4	1308	1311.67
ZINC000001774172	-7.5	1957	-9.1	474	-8.3	1505	1312
ZINC000008764452	-7.9	1409	-8.5	1230	-8.4	1309	1316
ZINC000015721884	-7.9	1411	-8.5	1232	-8.4	1310	1317.67
ZINC000011865974	-7.8	1546	-9	569	-8	1840	1318.33
ZINC000020394211	-7.9	1412	-8.5	1233	-8.4	1311	1318.67
ZINC000021911945	-7.9	1415	-8.5	1236	-8.4	1312	1321
ZINC000002325434	-8	1219	-8.8	802	-7.9	1943	1321.33
ZINC000040309469	-8.3	884	-8	1820	-8.4	1264	1322.67
ZINC000041146468	-7.9	1418	-8.5	1239	-8.4	1313	1323.33
ZINC000001857016	-7.9	1431	-8.4	1359	-8.5	1181	1323.67
ZINC000002774536	-7.9	1432	-8.4	1360	-8.5	1182	1324.67
ZINC000000465410	-8.2	993	-8.2	1580	-8.3	1411	1328
ZINC000008135953	-8.3	879	-8.1	1705	-8.3	1404	1329.33
ZINC000001782740	-7.8	1572	-8.6	1089	-8.4	1331	1330.67
ZINC000020547507	-8.2	997	-8.2	1584	-8.3	1412	1331
ZINC000027662189	-7.3	2217	-8.7	974	-8.8	804	1331.67
ZINC000005307695	-7.9	1455	-8.3	1487	-8.6	1055	1332.33
ZINC000001134403	-8	1209	-9	555	-7.6	2237	1333.67
ZINC000027793187	-8.5	643	-8	1811	-8.2	1550	1334.67
ZINC000012896637	-7.9	1487	-8.1	1734	-8.8	783	1334.67
ZINC000004943594	-7.7	1703	-8.7	964	-8.4	1339	1335.33
ZINC000010272773	-8.1	1112	-8.5	1196	-8.1	1699	1335.67
ZINC000002105433	-7.7	1708	-8.6	1095	-8.5	1204	1335.67
ZINC000002873306	-7.3	2213	-9	578	-8.5	1223	1338
ZINC000065248706	-7.9	1464	-8.3	1496	-8.6	1056	1338.67
ZINC000031437092	-7.6	1839	-8.7	971	-8.5	1209	1339.67
ZINC000000073848	-8.1	1149	-8.2	1587	-8.4	1284	1340
ZINC000000176897	-7.6	1841	-8.6	1104	-8.6	1076	1340.33
ZINC000001061484	-7.8	1589	-8.4	1373	-8.6	1060	1340.67
ZINC000004526333	-7.8	1582	-8.5	1248	-8.5	1193	1341
ZINC000000303763	-8.1	1152	-8.2	1590	-8.4	1285	1342.33
ZINC000020763563	-7.5	1967	-8.8	847	-8.5	1213	1342.33
ZINC000000121711	-8.1	1125	-8.4	1329	-8.2	1575	1343
ZINC000230209524	-7.6	1831	-8.9	701	-8.3	1497	1343
ZINC000004121118	-8.1	1153	-8.2	1591	-8.4	1286	1343.33
ZINC000010816916	-7.8	1585	-8.5	1251	-8.5	1194	1343.33
ZINC000012897764	-8.1	1144	-8.3	1464	-8.3	1430	1346
ZINC000008916957	-8.1	1157	-8.2	1595	-8.4	1287	1346.33
ZINC000002149921	-8.1	1130	-8.4	1334	-8.2	1576	1346.67
ZINC000000466407	-7.7	1717	-8.5	1255	-8.6	1068	1346.67
ZINC000012861531	-7.7	1720	-8.5	1258	-8.6	1069	1349
ZINC000000042677	-8	1279	-8.4	1339	-8.3	1440	1352.67
ZINC000000258573	-8	1290	-8.3	1470	-8.4	1302	1354
ZINC000000860277	-8	1268	-8.5	1210	-8.2	1586	1354.67
ZINC000000487729	-8	1282	-8.4	1342	-8.3	1441	1355
ZINC000002225665	-8	1283	-8.4	1343	-8.3	1442	1356
ZINC000006659337	-8	1270	-8.5	1212	-8.2	1587	1356.33
ZINC000000206445	-8	1308	-8.1	1722	-8.6	1039	1356.33
ZINC000004933096	-8.4	732	-8.4	1299	-7.8	2040	1357
ZINC000003117431	-7.6	1871	-8.2	1652	-9	551	1358
ZINC000048935555	-8	1277	-8.5	1219	-8.2	1588	1361.33
ZINC000000851803	-7.9	1404	-8.5	1225	-8.3	1456	1361.67
ZINC000075437297	-8	1278	-8.5	1220	-8.2	1589	1362.33
ZINC000000139291	-7.9	1423	-8.4	1351	-8.4	1314	1362.67
ZINC000004042308	-7.9	1406	-8.5	1227	-8.3	1457	1363.33
ZINC000000260264	-7.9	1425	-8.4	1353	-8.4	1315	1364.33
ZINC000005157014	-7.9	1408	-8.5	1229	-8.3	1458	1365
ZINC000000285367	-7.9	1426	-8.4	1354	-8.4	1316	1365.33
ZINC000000270124	-8.3	867	-8.3	1443	-8	1807	1372.33
ZINC000049409974	-7.9	1419	-8.5	1240	-8.3	1459	1372.67
ZINC000000985047	-7.8	1560	-8.8	829	-8.1	1732	1373.67
ZINC000000252998	-8.4	754	-8	1814	-8.2	1554	1374
ZINC000019606453	-8.4	755	-8	1815	-8.2	1555	1375
ZINC000000456872	-7.8	1570	-8.6	1087	-8.3	1468	1375
ZINC000000289917	-8.2	1002	-8.1	1711	-8.3	1413	1375.33
ZINC000006736847	-7.9	1456	-8.3	1488	-8.5	1183	1375.67
ZINC000000792717	-7.7	1688	-9.1	468	-7.9	1973	1376.33
ZINC000000870600	-8	1249	-8.6	1063	-8	1819	1377
ZINC000008764971	-7.9	1458	-8.3	1490	-8.5	1184	1377.33
ZINC000070666459	-8.3	877	-8.2	1577	-8.1	1689	1381
ZINC000001773231	-7.7	1702	-8.7	963	-8.3	1479	1381.33
ZINC000000036558	-8.1	1121	-8.4	1325	-8.1	1700	1382
ZINC000008490995	-8.2	996	-8.2	1583	-8.2	1568	1382.33
ZINC000019720612	-8.3	881	-8.1	1707	-8.2	1561	1383
ZINC000040309125	-7.7	1705	-8.7	966	-8.3	1480	1383.67
ZINC000027581507	-8.2	998	-8.2	1585	-8.2	1569	1384
ZINC000008828717	-7.7	1697	-8.8	836	-8.2	1623	1385.33
ZINC000008134493	-7.8	1583	-8.5	1249	-8.4	1332	1388
ZINC000032124514	-7.6	1846	-8.6	1109	-8.5	1210	1388.33
ZINC000019897830	-7.8	1593	-8.4	1377	-8.5	1195	1388.33
ZINC000000128782	-8.1	1135	-8.3	1455	-8.2	1577	1389
ZINC000002534555	-7.5	1971	-8.6	1111	-8.6	1085	1389
ZINC000008783043	-8.1	1132	-8.4	1336	-8.1	1701	1389.67
ZINC000072326064	-7.8	1595	-8.4	1379	-8.5	1196	1390
ZINC000036611944	-7.9	1389	-8.7	956	-8	1826	1390.33
ZINC000020761399	-7.8	1586	-8.5	1252	-8.4	1333	1390.33
ZINC000004089576	-7.6	1857	-8.4	1395	-8.7	922	1391.33
ZINC000011605144	-7.8	1606	-8.3	1508	-8.6	1061	1391.67
ZINC000002380258	-7.7	1718	-8.5	1256	-8.5	1205	1393
ZINC000004166992	-7.5	1979	-8.4	1402	-8.8	801	1394
ZINC000027662051	-7.8	1610	-8.3	1512	-8.6	1062	1394.67
ZINC000001156429	-8	1316	-8	1837	-8.6	1040	1397.67
ZINC000062001514	-8.1	1148	-8.3	1468	-8.2	1578	1398
ZINC000000037033	-8	1289	-8.3	1469	-8.3	1443	1400.33
ZINC000012895299	-8.1	1099	-8.6	1057	-7.8	2047	1401
ZINC000085875063	-7.7	1763	-8.2	1646	-8.8	794	1401
ZINC000040310323	-7	2492	-9.5	175	-8.3	1538	1401.67
ZINC000004814474	-8	1293	-8.3	1473	-8.3	1444	1403.33
ZINC000000314646	-8.2	1009	-7.9	1940	-8.4	1272	1407
ZINC000000349992	-8.1	1104	-8.5	1188	-7.9	1931	1407.67
ZINC000021911941	-8	1288	-8.4	1348	-8.2	1590	1408.67
ZINC000006947039	-7.7	1693	-8.9	698	-8	1849	1413.33
ZINC000000183254	-8.3	872	-8.2	1572	-8	1808	1417.33
ZINC000065248724	-8.1	1119	-8.5	1203	-7.9	1932	1418
ZINC000065248721	-8.4	757	-8	1817	-8.1	1687	1420.33
ZINC000000183903	-8.2	991	-8.2	1578	-8.1	1694	1421
ZINC000015721829	-7.9	1438	-8.4	1366	-8.3	1460	1421.33
ZINC000013722995	-7.9	1459	-8.3	1491	-8.4	1317	1422.33
ZINC000002494787	-7.9	1483	-8.1	1730	-8.6	1057	1423.33
ZINC000008764771	-7.9	1473	-8.2	1613	-8.5	1185	1423.67
ZINC000022468127	-7.9	1463	-8.3	1495	-8.4	1318	1425.33
ZINC000012296848	-7.9	1476	-8.2	1616	-8.5	1186	1426
ZINC000020740781	-7.7	1698	-8.8	837	-8.1	1744	1426.33
ZINC000000188569	-8.2	1001	-8.1	1710	-8.2	1570	1427
ZINC000001137359	-8.1	1166	-8	1828	-8.4	1288	1427.33
ZINC000096115940	-7.9	1478	-8.2	1618	-8.5	1187	1427.67
ZINC000004590889	-8.1	1167	-8	1829	-8.4	1289	1428.33
ZINC000000116331	-7.7	1701	-8.7	962	-8.2	1624	1429
ZINC000014153647	-8.2	1004	-8.1	1713	-8.2	1571	1429.33
ZINC000002927614	-7.7	1710	-8.6	1097	-8.3	1481	1429.33
ZINC000062001515	-8.1	1168	-8	1830	-8.4	1290	1429.33
ZINC000000437169	-7.8	1578	-8.5	1244	-8.3	1469	1430.33
ZINC000000133071	-7.8	1596	-8.3	1498	-8.5	1197	1430.33
ZINC000008764703	-7.7	1704	-8.7	965	-8.2	1625	1431.33
ZINC000001615443	-7.8	1579	-8.5	1245	-8.3	1470	1431.33
ZINC000004166988	-7.8	1580	-8.5	1246	-8.3	1471	1432.33
ZINC000017911520	-7.4	2102	-8.5	1270	-8.7	926	1432.67
ZINC000000430322	-7.8	1600	-8.3	1502	-8.5	1198	1433.33
ZINC000002723188	-7.4	2099	-8.6	1114	-8.6	1089	1434
ZINC000000030012	-8.1	1158	-8.1	1715	-8.3	1431	1434.67
ZINC000008869946	-8.1	1143	-8.3	1463	-8.1	1702	1436
ZINC000008734454	-7.5	1961	-8.9	702	-8.2	1647	1436.67
ZINC000217919859	-7.8	1587	-8.5	1253	-8.3	1472	1437.33
ZINC000019804924	-8.1	1146	-8.3	1466	-8.1	1703	1438.33
ZINC000005272523	-7.4	2096	-8.9	704	-8.3	1515	1438.33
ZINC000006947087	-8	1326	-7.9	1952	-8.6	1041	1439.67
ZINC000062001828	-7.5	1968	-8.8	848	-8.3	1506	1440.67
ZINC000005267760	-7.4	2109	-8.4	1411	-8.8	802	1440.67
ZINC000000893185	-7.6	1854	-8.4	1392	-8.6	1077	1441
ZINC000013557241	-7.6	1858	-8.4	1396	-8.6	1078	1444
ZINC000008917445	-8	1285	-8.4	1345	-8.1	1705	1445
ZINC000070666404	-8	1321	-8	1842	-8.5	1173	1445.33
ZINC000000184586	-7.9	1400	-8.5	1221	-8.1	1718	1446.33
ZINC000000210701	-8	1297	-8.2	1597	-8.3	1445	1446.33
ZINC000012248578	-8.1	1113	-8.5	1197	-7.8	2048	1452.67
ZINC000004814545	-7.8	1567	-8.7	959	-8	1841	1455.67
ZINC000005388414	-8.2	988	-8.3	1452	-7.9	1928	1456
ZINC000032124518	-8.2	1012	-7.9	1943	-8.3	1414	1456.33
ZINC000023142442	-7.9	1416	-8.5	1237	-8.1	1719	1457.33
ZINC000085879182	-8.5	647	-7.8	2045	-8.1	1684	1458.67
ZINC000006624197	-8.4	751	-8.1	1701	-7.9	1926	1459.33
ZINC000002261576	-8.3	876	-8.2	1576	-7.9	1927	1459.67
ZINC000000859108	-7.9	1429	-8.4	1357	-8.2	1595	1460.33
ZINC000000245322	-8.6	536	-7.8	2043	-8	1805	1461.33
ZINC000000394916	-7.9	1446	-8.3	1478	-8.3	1461	1461.67
ZINC000000445020	-8.1	1126	-8.4	1330	-7.9	1933	1463
ZINC000004353955	-7.9	1433	-8.4	1361	-8.2	1596	1463.33
ZINC000000813617	-7.9	1383	-8.7	950	-7.8	2060	1464.33
ZINC000002380264	-7.9	1469	-8.2	1609	-8.4	1319	1465.67
ZINC000002864579	-7.9	1453	-8.3	1485	-8.3	1462	1466.67
ZINC000000049465	-8.2	1000	-8.1	1709	-8.1	1695	1468
ZINC000017845831	-7.9	1477	-8.2	1617	-8.4	1320	1471.33
ZINC000000127857	-8.1	1164	-8	1826	-8.3	1432	1474
ZINC000000525729	-7.7	1706	-8.6	1093	-8.2	1626	1475
ZINC000096113786	-7.9	1465	-8.3	1497	-8.3	1463	1475
ZINC000000303500	-7.8	1647	-8	1861	-8.7	919	1475.67
ZINC000065248699	-8.1	1169	-8	1831	-8.3	1433	1477.67
ZINC000045293480	-8	1276	-8.5	1218	-7.9	1944	1479.33
ZINC000000185016	-7.7	1773	-8	1870	-8.8	795	1479.33
ZINC000006946433	-7.7	1713	-8.6	1100	-8.2	1627	1480
ZINC000000860279	-7.7	1776	-8	1873	-8.8	796	1481.67
ZINC000002998809	-7.6	1843	-8.6	1106	-8.3	1498	1482.33
ZINC000000212481	-7.7	1726	-8.4	1382	-8.4	1340	1482.67
ZINC000004539378	-8.1	1154	-8.2	1592	-8.1	1704	1483.33
ZINC000019735183	-7.8	1622	-8.2	1629	-8.5	1199	1483.33
ZINC000000258674	-7.7	1727	-8.4	1383	-8.4	1341	1483.67
ZINC000000258631	-7.7	1749	-8.2	1632	-8.6	1070	1483.67
ZINC000000798517	-7.9	1402	-8.5	1223	-8	1827	1484
ZINC000012296516	-8	1286	-8.4	1346	-8	1820	1484
ZINC000000130061	-7.6	1852	-8.4	1390	-8.5	1211	1484.33
ZINC000000860141	-7.7	1728	-8.4	1384	-8.4	1342	1484.67
ZINC000022468146	-7.8	1609	-8.3	1511	-8.4	1334	1484.67
ZINC000005063606	-7.7	1782	-8	1879	-8.8	797	1486
ZINC000013259981	-7.5	1966	-8.8	846	-8.2	1648	1486.67
ZINC000019897816	-7.7	1721	-8.5	1259	-8.3	1482	1487.33
ZINC000056452037	-8	1320	-8	1841	-8.4	1303	1488
ZINC000027749423	-7.7	1722	-8.5	1260	-8.3	1483	1488.33
ZINC000002708394	-7.5	1978	-8.4	1401	-8.6	1086	1488.33
ZINC000072324623	-7.7	1723	-8.5	1261	-8.3	1484	1489.33
ZINC000006917981	-7.7	1742	-8.3	1522	-8.5	1206	1490
ZINC000000101628	-8.4	760	-7.7	2155	-8.2	1556	1490.33
ZINC000057419423	-8	1295	-8.3	1475	-8.1	1706	1492
ZINC000003623313	-8	1309	-8.1	1723	-8.3	1446	1492.67
ZINC000004671965	-8	1310	-8.1	1724	-8.3	1447	1493.67
ZINC000064677353	-8.2	989	-8.3	1453	-7.8	2045	1495.67
ZINC000002864702	-7.8	1554	-8.9	694	-7.6	2241	1496.33
ZINC000004673412	-8	1302	-8.2	1602	-8.2	1591	1498.33
ZINC000001216272	-8.5	646	-7.8	2044	-8	1806	1498.67
ZINC000000477778	-7.9	1427	-8.4	1355	-8.1	1720	1500.67
ZINC000000818842	-7.9	1428	-8.4	1356	-8.1	1721	1501.67
ZINC000000433183	-7.9	1447	-8.3	1479	-8.2	1597	1507.67
ZINC000000640096	-7.9	1507	-7.9	1958	-8.6	1058	1507.67
ZINC000019902227	-8.2	1011	-7.9	1942	-8.2	1572	1508.33
ZINC000004342713	-8.2	1003	-8.1	1712	-8	1811	1508.67
ZINC000002430871	-7.9	1450	-8.3	1482	-8.2	1598	1510
ZINC000075437380	-7.9	1442	-8.4	1370	-8.1	1722	1511.33
ZINC000000872105	-7.9	1467	-8.2	1607	-8.3	1464	1512.67
ZINC000006917884	-7.9	1486	-8.1	1733	-8.4	1321	1513.33
ZINC000008765081	-7.9	1501	-8	1854	-8.5	1188	1514.33
ZINC000017064889	-8.1	1145	-8.3	1465	-7.9	1934	1514.67
ZINC000007000021	-7.9	1457	-8.3	1489	-8.2	1599	1515
ZINC000065248700	-7.9	1488	-8.1	1735	-8.4	1322	1515
ZINC000019565317	-7.9	1502	-8	1855	-8.5	1189	1515.33
ZINC000017911474	-7.9	1460	-8.3	1492	-8.2	1600	1517.33
ZINC000000104215	-8.1	1150	-8.2	1588	-8	1816	1518
ZINC000006736823	-7.7	1712	-8.6	1099	-8.1	1745	1518.67
ZINC000000303757	-7.8	1624	-8.1	1738	-8.5	1200	1520.67
ZINC000000443952	-7.8	1588	-8.4	1372	-8.2	1608	1522.67
ZINC000000258922	-8.1	1165	-8	1827	-8.2	1579	1523.67
ZINC000010146608	-7.8	1592	-8.4	1376	-8.2	1609	1525.67
ZINC000062001451	-7.4	2097	-8.9	705	-8.1	1776	1526
ZINC000000030767	-7.6	1840	-8.6	1103	-8.2	1639	1527.33
ZINC000005378372	-7.8	1620	-8.2	1627	-8.4	1335	1527.33
ZINC000004112273	-7.9	1407	-8.5	1228	-7.9	1949	1528
ZINC000000947080	-7.3	2220	-8.5	1274	-8.6	1090	1528
ZINC000049420907	-7.8	1654	-8	1868	-8.6	1063	1528.33
ZINC000008869947	-8.2	1014	-7.7	2158	-8.3	1415	1529
ZINC000000067922	-7.7	1724	-8.4	1380	-8.3	1485	1529.67
ZINC000021911908	-7.8	1608	-8.3	1510	-8.3	1473	1530.33
ZINC000000042341	-8.5	640	-8	1808	-7.7	2145	1531
ZINC000000030164	-8	1312	-8	1833	-8.3	1448	1531
ZINC000000047229	-8	1313	-8	1834	-8.3	1449	1532
ZINC000027746398	-7.4	2104	-8.5	1272	-8.5	1220	1532
ZINC000000261835	-7.6	1868	-8.2	1649	-8.6	1079	1532
ZINC000003061940	-7.6	1856	-8.4	1394	-8.4	1347	1532.33
ZINC000000044431	-7.9	1421	-8.4	1349	-8	1828	1532.67
ZINC000000050301	-7.7	1716	-8.5	1254	-8.2	1628	1532.67
ZINC000000101578	-8	1296	-8.2	1596	-8.1	1707	1533
ZINC000000063712	-8	1314	-8	1835	-8.3	1450	1533
ZINC000000104210	-8.1	1124	-8.4	1328	-7.7	2150	1534
ZINC000230209518	-7.5	1983	-8.4	1406	-8.5	1214	1534.33
ZINC000000225001	-8	1298	-8.2	1598	-8.1	1708	1534.67
ZINC000002748138	-7.7	1719	-8.5	1257	-8.2	1629	1535
ZINC000000077856	-7.6	1847	-8.5	1262	-8.3	1499	1536
ZINC000022468168	-7.6	1865	-8.3	1532	-8.5	1212	1536.33
ZINC000000183870	-7.6	1848	-8.5	1263	-8.3	1500	1537
ZINC000015424180	-7.7	1744	-8.3	1524	-8.4	1343	1537
ZINC000002898724	-7.5	1988	-8.3	1537	-8.6	1087	1537.33
ZINC000002902000	-7.5	1989	-8.3	1538	-8.6	1088	1538.33
ZINC000004487683	-7.9	1434	-8.4	1362	-8	1829	1541.67
ZINC000000188482	-8.3	888	-7.8	2047	-8.1	1690	1541.67
ZINC000000900119	-8	1269	-8.5	1211	-7.7	2153	1544.33
ZINC000000101633	-8.2	1006	-8	1823	-8	1812	1547
ZINC000006670403	-8.1	1140	-8.3	1460	-7.8	2049	1549.67
ZINC000003089782	-7.9	1454	-8.3	1486	-8.1	1723	1554.33
ZINC000000176707	-7.6	1836	-8.7	968	-8	1860	1554.67
ZINC000000849954	-7.4	2095	-9	577	-7.9	2005	1559
ZINC000001770383	-7.9	1468	-8.2	1608	-8.2	1601	1559
ZINC000004740655	-7.9	1470	-8.2	1610	-8.2	1602	1560.67
ZINC000000308309	-8.5	641	-8	1809	-7.6	2235	1561.67
ZINC000006917925	-8.1	1156	-8.2	1594	-7.9	1935	1561.67
ZINC000006947018	-7.9	1472	-8.2	1612	-8.2	1603	1562.33
ZINC000000267823	-7.5	1964	-8.8	844	-8	1882	1563.33
ZINC000000067887	-7.3	2218	-8.6	1116	-8.4	1359	1564.33
ZINC000072325228	-7.4	2098	-8.9	706	-8	1892	1565.33
ZINC000000187413	-8.1	1173	-7.9	1946	-8.2	1580	1566.33
ZINC000004173627	-7.6	1844	-8.6	1107	-8.1	1755	1568.67
ZINC000000199656	-7.8	1598	-8.3	1500	-8.2	1610	1569.33
ZINC000005782792	-7.6	1845	-8.6	1108	-8.1	1756	1569.67
ZINC000000973204	-7.2	2326	-8.8	851	-8.3	1533	1570
ZINC000006760720	-7.8	1631	-8.1	1745	-8.4	1336	1570.67
ZINC000002901550	-7.4	2122	-8.1	1792	-8.8	803	1572.33
ZINC000000258917	-8	1299	-8.2	1599	-8	1821	1573
ZINC000017440578	-7.8	1621	-8.2	1628	-8.3	1474	1574.33
ZINC000000066503	-7.7	1748	-8.2	1631	-8.4	1344	1574.33
ZINC000012391442	-7.8	1637	-8.1	1751	-8.4	1337	1575
ZINC000002223843	-7.5	1970	-8.6	1110	-8.2	1649	1576.33
ZINC000009532029	-7.4	2100	-8.6	1115	-8.3	1516	1577
ZINC000019902252	-8	1327	-7.9	1953	-8.3	1451	1577
ZINC000218085683	-8	1305	-8.2	1605	-8	1822	1577.33
ZINC000000087123	-8	1306	-8.1	1720	-8.1	1709	1578.33
ZINC000079189062	-7.8	1611	-8.3	1513	-8.2	1611	1578.33
ZINC000000860155	-7.7	1735	-8.3	1515	-8.3	1486	1578.67
ZINC000000037225	-8.4	759	-7.9	1938	-7.8	2041	1579.33
ZINC000001025950	-7.9	1430	-8.4	1358	-7.9	1950	1579.33
ZINC000000128522	-8	1307	-8.1	1721	-8.1	1710	1579.33
ZINC000000043178	-8.3	887	-7.8	2046	-8	1809	1580.67
ZINC000019902225	-7.6	1887	-8.1	1775	-8.6	1080	1580.67
ZINC000001750389	-7.7	1738	-8.3	1518	-8.3	1487	1581
ZINC000000104829	-8.3	883	-8	1819	-7.8	2042	1581.33
ZINC000002097661	-7.7	1729	-8.4	1385	-8.2	1630	1581.33
ZINC000000661173	-7.6	1853	-8.4	1391	-8.3	1501	1581.67
ZINC000033422042	-8	1311	-8.1	1725	-8.1	1711	1582.33
ZINC000002149920	-7.7	1730	-8.4	1386	-8.2	1631	1582.33
ZINC000065248701	-8.3	885	-8	1821	-7.8	2043	1583
ZINC000012894114	-7.5	1993	-8.3	1542	-8.5	1215	1583.33
ZINC000072326109	-7.7	1762	-8.2	1645	-8.4	1345	1584
ZINC000000294101	-7.6	1849	-8.5	1264	-8.2	1640	1584.33
ZINC000012383591	-7.7	1743	-8.3	1523	-8.3	1488	1584.67
ZINC000000780272	-7.9	1448	-8.3	1480	-8	1830	1586
ZINC000000193375	-8.2	1008	-7.9	1939	-8	1813	1586.67
ZINC000085879126	-7.7	1747	-8.3	1527	-8.3	1489	1587.67
ZINC000002743379	-7.9	1452	-8.3	1484	-8	1831	1589
ZINC000000051062	-8	1280	-8.4	1340	-7.7	2154	1591.33
ZINC000008997482	-7.8	1584	-8.5	1250	-7.9	1958	1597.33
ZINC000000917430	-7.5	1960	-9	576	-7.6	2259	1598.33
ZINC000006623988	-8.1	1155	-8.2	1593	-7.8	2050	1599.33
ZINC000000047682	-8.1	1163	-8	1825	-8	1817	1601.67
ZINC000006659778	-7.9	1471	-8.2	1611	-8.1	1724	1602
ZINC000001735630	-7.6	1842	-8.6	1105	-8	1861	1602.67
ZINC000000272845	-8.1	1177	-7.8	2051	-8.2	1581	1603
ZINC000000303384	-7.6	1909	-7.9	1981	-8.7	923	1604.33
ZINC000000779527	-8	1342	-7.1	2577	-8.7	894	1604.33
ZINC000004000290	-8	1292	-8.3	1472	-7.8	2054	1606
ZINC000016850764	-8.2	1019	-7.4	2394	-8.3	1416	1609.67
ZINC000019565308	-7.8	1660	-7.9	1969	-8.5	1201	1610
ZINC000095473130	-7.9	1490	-8.1	1737	-8.2	1604	1610.33
ZINC000009776583	-8.2	1016	-7.6	2245	-8.2	1573	1611.33
ZINC000000302919	-8	1300	-8.2	1600	-7.9	1945	1615
ZINC000000212473	-7.8	1613	-8.2	1620	-8.2	1612	1615
ZINC000019787114	-7.8	1607	-8.3	1509	-8.1	1733	1616.33
ZINC000000263644	-7.3	2216	-8.7	973	-8.2	1664	1617.67
ZINC000006810057	-8.3	891	-7.7	2157	-8	1810	1619.33
ZINC000000053904	-7.9	1444	-8.3	1476	-7.9	1951	1623.67
ZINC000032124098	-8	1319	-8	1840	-8.1	1712	1623.67
ZINC000004090069	-7.6	1850	-8.5	1265	-8.1	1757	1624
ZINC000000405248	-7.5	1998	-8.2	1658	-8.5	1216	1624
ZINC000000284207	-7.7	1750	-8.2	1633	-8.3	1490	1624.33
ZINC000002464235	-7.4	2107	-8.4	1409	-8.4	1357	1624.33
ZINC000032124252	-8.2	1013	-7.8	2049	-8	1814	1625.33
ZINC000096114257	-8	1322	-8	1843	-8.1	1713	1626
ZINC000002481327	-8.2	1010	-7.9	1941	-7.9	1929	1626.67
ZINC000020547066	-7.6	1905	-8	1897	-8.6	1081	1627.67
ZINC000001470745	-7.4	2101	-8.5	1269	-8.3	1517	1629
ZINC000000947087	-7.6	1855	-8.4	1393	-8.2	1641	1629.67
ZINC000032124448	-7.5	1995	-8.3	1544	-8.4	1350	1629.67
ZINC000005217324	-7.5	1980	-8.4	1403	-8.3	1507	1630
ZINC000017911521	-7.4	2103	-8.5	1271	-8.3	1518	1630.67
ZINC000019897831	-7.7	1760	-8.2	1643	-8.3	1491	1631.33
ZINC000022468121	-7.6	1864	-8.3	1531	-8.3	1502	1632.33
ZINC000021883190	-7.6	1859	-8.4	1397	-8.2	1642	1632.67
ZINC000012662276	-7.9	1516	-7.8	2059	-8.4	1323	1632.67
ZINC000036369838	-7.7	1745	-8.3	1525	-8.2	1632	1634
ZINC000054297640	-7.9	1518	-7.8	2061	-8.4	1324	1634.33
ZINC000020412441	-7.9	1461	-8.3	1493	-7.9	1952	1635.33
ZINC000011916604	-7.9	1475	-8.2	1615	-8	1832	1640.67
ZINC000000029645	-7.9	1503	-7.9	1954	-8.3	1465	1640.67
ZINC000008764993	-8.1	1159	-8.1	1716	-7.8	2051	1642
ZINC000017911463	-8.1	1160	-8.1	1717	-7.8	2052	1643
ZINC000000860140	-7.9	1481	-8.1	1728	-8.1	1725	1644.67
ZINC000001428654	-7.9	1493	-8	1846	-8.2	1605	1648
ZINC000000641902	-7.8	1601	-8.3	1503	-8	1842	1648.67
ZINC000002610313	-7.9	1494	-8	1847	-8.2	1606	1649
ZINC000062005038	-7.7	1801	-7.8	2076	-8.6	1071	1649.33
ZINC000031775768	-7.2	2338	-8.2	1682	-8.7	928	1649.33
ZINC000004023847	-8	1284	-8.4	1344	-7.5	2321	1649.67
ZINC000079188768	-8	1336	-7.7	2166	-8.3	1452	1651.33
ZINC000002137347	-7.5	2034	-7.9	1997	-8.7	924	1651.67
ZINC000006946530	-7.7	1731	-8.4	1387	-8	1850	1656
ZINC000004673507	-8	1339	-7.5	2325	-8.4	1304	1656
ZINC000002721476	-7.7	1709	-8.6	1096	-7.7	2168	1657.67
ZINC000002145307	-7.8	1617	-8.2	1624	-8.1	1734	1658.33
ZINC000012371691	-7.2	2327	-8.7	975	-8.2	1675	1659
ZINC000002102995	-7.8	1625	-8.1	1739	-8.2	1613	1659
ZINC000001851949	-8	1317	-8	1838	-8	1823	1659.33
ZINC000002989963	-7.8	1619	-8.2	1626	-8.1	1735	1660
ZINC000002484265	-7.8	1626	-8.1	1740	-8.2	1614	1660
ZINC000003881190	-8.3	889	-7.8	2048	-7.8	2044	1660.33
ZINC000006728901	-8	1318	-8	1839	-8	1824	1660.33
ZINC000031035431	-7.6	1915	-7.9	1987	-8.6	1082	1661.33
ZINC000002991806	-7.8	1628	-8.1	1742	-8.2	1615	1661.67
ZINC000000037324	-8	1323	-7.9	1949	-8.1	1714	1662
ZINC000000372650	-7.7	1734	-8.3	1514	-8.1	1746	1664.67
ZINC000002860352	-7.6	1880	-8.1	1768	-8.4	1348	1665.33
ZINC000008916956	-7.8	1634	-8.1	1748	-8.2	1616	1666
ZINC000000824757	-7.3	2223	-8.4	1416	-8.4	1360	1666.33
ZINC000000947759	-7.3	2228	-8.3	1550	-8.5	1224	1667.33
ZINC000001750406	-7.7	1739	-8.3	1519	-8.1	1747	1668.33
ZINC000000309702	-7.5	1997	-8.2	1657	-8.4	1351	1668.33
ZINC000072324668	-8.3	886	-8	1822	-7.5	2318	1675.33
ZINC000022468174	-7.7	1771	-8.1	1763	-8.3	1492	1675.33
ZINC000000459526	-7.5	1985	-8.3	1534	-8.3	1508	1675.67
ZINC000006920168	-7.7	1759	-8.2	1642	-8.2	1633	1678
ZINC000005208042	-7.4	2108	-8.4	1410	-8.3	1519	1679
ZINC000004731668	-7.5	1991	-8.3	1540	-8.3	1509	1680
ZINC000001049568	-7.9	1482	-8.1	1729	-8	1833	1681.33
ZINC000021911904	-7.5	1994	-8.3	1543	-8.3	1510	1682.33
ZINC000004342707	-7.9	1484	-8.1	1731	-8	1834	1683
ZINC000004028110	-7.7	1711	-8.6	1098	-7.6	2242	1683.67
ZINC000000030015	-8.1	1171	-7.9	1944	-7.9	1936	1683.67
ZINC000002181315	-8.1	1174	-7.9	1947	-7.9	1937	1686
ZINC000072325190	-8.1	1175	-7.9	1948	-7.9	1938	1687
ZINC000000167151	-7.9	1492	-8	1845	-8.1	1726	1687.67
ZINC000000799393	-7.8	1602	-8.3	1504	-7.9	1959	1688.33
ZINC000002870023	-7.8	1603	-8.3	1505	-7.9	1960	1689.33
ZINC000004178476	-7.5	1972	-8.6	1112	-7.9	1993	1692.33
ZINC000006917970	-7.9	1499	-8	1852	-8.1	1727	1692.67
ZINC000000128221	-7.7	1725	-8.4	1381	-7.9	1974	1693.33
ZINC000019781684	-7.5	2055	-7.8	2103	-8.7	925	1694.33
ZINC000002528942	-7.8	1618	-8.2	1625	-8	1843	1695.33
ZINC000000030553	-8	1332	-7.7	2162	-8.2	1592	1695.33
ZINC000040313233	-7.8	1623	-8.2	1630	-8	1844	1699
ZINC000019237228	-7.6	1928	-7.8	2087	-8.6	1083	1699.33
ZINC000009215973	-7.6	1851	-8.5	1266	-7.9	1983	1700
ZINC000072325188	-8	1331	-7.8	2055	-8.1	1715	1700.33
ZINC000000947079	-7.7	1737	-8.3	1517	-8	1851	1701.67
ZINC000019897832	-8.2	1020	-7.4	2395	-8.1	1696	1703.67
ZINC000002317234	-7.7	1740	-8.3	1520	-8	1852	1704
ZINC000002145303	-7.2	2333	-8.3	1554	-8.5	1226	1704.33
ZINC000003900165	-7.7	1741	-8.3	1521	-8	1853	1705
ZINC000022468162	-7.6	1860	-8.4	1398	-8	1862	1706.67
ZINC000062001589	-7.9	1529	-7.4	2402	-8.5	1190	1707
ZINC000042228347	-7.2	2329	-8.6	1118	-8.2	1676	1707.67
ZINC000032123846	-7.8	1638	-8.1	1752	-8.1	1736	1708.67
ZINC000060349754	-7.8	1639	-8.1	1753	-8.1	1737	1709.67
ZINC000000470065	-7.7	1751	-8.2	1634	-8.1	1748	1711
ZINC000075157256	-7.8	1641	-8.1	1755	-8.1	1738	1711.33
ZINC000005346677	-7.8	1652	-8	1866	-8.2	1617	1711.67
ZINC000000261828	-7.3	2227	-8.3	1549	-8.4	1361	1712.33
ZINC000032657689	-7.8	1653	-8	1867	-8.2	1618	1712.67
ZINC000000208127	-7.5	1976	-8.4	1399	-8.1	1766	1713.67
ZINC000000319492	-7.5	1977	-8.4	1400	-8.1	1767	1714.67
ZINC000002864653	-7.5	2010	-8.1	1783	-8.4	1352	1715
ZINC000000303107	-7.6	1861	-8.3	1528	-8.1	1758	1715.67
ZINC000006766260	-7.7	1758	-8.2	1641	-8.1	1749	1716
ZINC000002156211	-7.7	1779	-8	1876	-8.3	1493	1716
ZINC000000051061	-7.7	1764	-8.1	1756	-8.2	1634	1718
ZINC000019537586	-7.5	2014	-8.1	1787	-8.4	1353	1718
ZINC000040312711	-7.5	1982	-8.4	1405	-8.1	1768	1718.33
ZINC000000780273	-7.9	1480	-8.1	1727	-7.9	1953	1720
ZINC000000149855	-7.8	1597	-8.3	1499	-7.8	2065	1720.33
ZINC000017911475	-7.6	1886	-8.1	1774	-8.3	1503	1721
ZINC000001168913	-7.3	2224	-8.4	1417	-8.3	1527	1722.67
ZINC000004680889	-7.9	1485	-8.1	1732	-7.9	1954	1723.67
ZINC000001771928	-7.5	1987	-8.3	1536	-8.2	1650	1724.33
ZINC000004084527	-7.5	2001	-8.2	1661	-8.3	1511	1724.33
ZINC000004728143	-7.5	2002	-8.2	1662	-8.3	1512	1725.33
ZINC000002855314	-7.3	2214	-8.8	849	-7.8	2114	1725.67
ZINC000004087671	-7.4	2113	-8.3	1546	-8.3	1520	1726.33
ZINC000002864762	-7.9	1496	-8	1849	-8	1835	1726.67
ZINC000000851780	-7.9	1515	-7.8	2058	-8.2	1607	1726.67
ZINC000000634162	-8.3	890	-7.7	2156	-7.7	2148	1731.33
ZINC000002927593	-7.9	1508	-7.9	1959	-8.1	1728	1731.67
ZINC000003029286	-7.9	1509	-7.9	1960	-8.1	1729	1732.67
ZINC000027662043	-7.7	1811	-7.7	2182	-8.5	1207	1733.33
ZINC000000318791	-7.8	1663	-7.8	2063	-8.3	1475	1733.67
ZINC000002927581	-7.8	1627	-8.1	1741	-8	1845	1737.67
ZINC000000077540	-7.1	2413	-8.5	1279	-8.3	1535	1742.33
ZINC000000042678	-7.5	2028	-7.9	1991	-8.5	1217	1745.33
ZINC000075157255	-7.8	1640	-8.1	1754	-8	1846	1746.67
ZINC000065248725	-7.9	1525	-7.6	2251	-8.3	1466	1747.33
ZINC000000168547	-7.8	1645	-8	1859	-8.1	1739	1747.67
ZINC000008765042	-7.9	1474	-8.2	1614	-7.7	2156	1748
ZINC000002860321	-7.7	1754	-8.2	1637	-8	1854	1748.33
ZINC000028288164	-7.8	1661	-7.9	1970	-8.2	1619	1750
ZINC000000029974	-7.7	1784	-7.9	1972	-8.3	1494	1750
ZINC000002188661	-7.8	1649	-8	1863	-8.1	1740	1750.67
ZINC000006751102	-7.6	1862	-8.3	1529	-8	1863	1751.33
ZINC000000311644	-7.4	2125	-8	1912	-8.5	1221	1752.67
ZINC000000860107	-7.7	1788	-7.9	1976	-8.3	1495	1753
ZINC000000047661	-7.3	2242	-8.1	1795	-8.5	1225	1754
ZINC000100793085	-8.1	1162	-8.1	1719	-7.4	2383	1754.67
ZINC000000069962	-7.9	1479	-8.1	1726	-7.8	2061	1755.33
ZINC000006660113	-7.5	1981	-8.4	1404	-8	1883	1756
ZINC000000183691	-7.6	1867	-8.2	1648	-8.1	1759	1758
ZINC000000517333	-8.1	1178	-7.7	2159	-7.9	1939	1758.67
ZINC000005217329	-7.7	1767	-8.1	1759	-8.1	1750	1758.67
ZINC000000128609	-7.7	1772	-8	1869	-8.2	1635	1758.67
ZINC000000121330	-7.6	1890	-8	1882	-8.3	1504	1758.67
ZINC000082138161	-7.3	2240	-8.2	1676	-8.4	1362	1759.33
ZINC000000151327	-8.1	1176	-7.8	2050	-7.8	2053	1759.67
ZINC000004036462	-8.1	1179	-7.7	2160	-7.9	1940	1759.67
ZINC000006760482	-7.7	1768	-8.1	1760	-8.1	1751	1759.67
ZINC000004992595	-7	2493	-8.4	1420	-8.4	1366	1759.67
ZINC000000025570	-7.6	1937	-7.6	2260	-8.6	1084	1760.33
ZINC000141733092	-8.1	1180	-7.7	2161	-7.9	1941	1760.67
ZINC000019897886	-7.7	1770	-8.1	1762	-8.1	1752	1761.33
ZINC000040309887	-7.2	2332	-8.5	1278	-8.2	1677	1762.33
ZINC000000128498	-7.9	1491	-8	1844	-7.9	1955	1763.33
ZINC000000052126	-7.9	1504	-7.9	1955	-8	1836	1765
ZINC000000030555	-7.8	1612	-8.2	1619	-7.8	2066	1765.67
ZINC000002910499	-7.6	1883	-8.1	1771	-8.2	1643	1765.67
ZINC000003155965	-7.5	1990	-8.3	1539	-8.1	1769	1766
ZINC000000036046	-7.9	1513	-7.8	2056	-8.1	1730	1766.33
ZINC000006947166	-7.4	2111	-8.4	1413	-8.1	1777	1767
ZINC000006668550	-7.9	1498	-8	1851	-7.9	1956	1768.33
ZINC000008879429	-7.4	2118	-8.2	1667	-8.3	1521	1768.67
ZINC000072326107	-7.5	1996	-8.3	1545	-8.1	1770	1770.33
ZINC000080790821	-7.5	2015	-8.1	1788	-8.3	1513	1772
ZINC000012662315	-7.8	1670	-7.7	2170	-8.3	1476	1772
ZINC000008739328	-7.5	2003	-8.2	1663	-8.2	1651	1772.33
ZINC000000172199	-8	1328	-7.8	2052	-7.9	1946	1775.33
ZINC000000890176	-7.7	1736	-8.3	1516	-7.8	2075	1775.67
ZINC000000258190	-7.7	1806	-7.7	2177	-8.4	1346	1776.33
ZINC000002780061	-8	1325	-7.9	1951	-7.8	2055	1777
ZINC000004268957	-7.8	1630	-8.1	1744	-7.9	1961	1778.33
ZINC000004553148	-7.5	1975	-8.5	1268	-7.8	2097	1780
ZINC000006917923	-7.8	1632	-8.1	1746	-7.9	1962	1780
ZINC000000184993	-7.9	1424	-8.4	1352	-7.1	2566	1780.67
ZINC000007006538	-7.8	1633	-8.1	1747	-7.9	1963	1781
ZINC000011916602	-7.8	1636	-8.1	1750	-7.9	1964	1783.33
ZINC000085874716	-7.8	1666	-7.8	2066	-8.2	1620	1784
ZINC000002097402	-7.2	2328	-8.6	1117	-8	1913	1786
ZINC000012321316	-7.7	1732	-8.4	1388	-7.6	2243	1787.67
ZINC000004740610	-7.8	1651	-8	1865	-8	1847	1787.67
ZINC000002156214	-7.7	1753	-8.2	1636	-7.9	1975	1788
ZINC000002836315	-7.7	1797	-7.8	2072	-8.3	1496	1788.33
ZINC000001774456	-7.8	1658	-7.9	1967	-8.1	1741	1788.67
ZINC000038516596	-7.1	2414	-8.4	1419	-8.3	1536	1789.67
ZINC000000194222	-7.9	1445	-8.3	1477	-7.3	2451	1791
ZINC000019564589	-7.5	2054	-7.8	2102	-8.5	1218	1791.33
ZINC000041751762	-7.8	1662	-7.9	1971	-8.1	1742	1791.67
ZINC000008764617	-7.6	1863	-8.3	1530	-7.9	1984	1792.33
ZINC000000284204	-7.7	1765	-8.1	1757	-8	1855	1792.33
ZINC000000887157	-8.6	537	-7.4	2392	-7.3	2450	1793
ZINC000000293660	-7.5	2032	-7.9	1995	-8.4	1354	1793.67
ZINC000002910112	-8.2	1017	-7.5	2322	-7.8	2046	1795
ZINC000003614799	-7.6	1872	-8.2	1653	-8	1864	1796.33
ZINC000004122329	-7.6	1873	-8.2	1654	-8	1865	1797.33
ZINC000000778542	-7.9	1466	-8.2	1606	-7.5	2323	1798.33
ZINC000005378112	-7.6	1874	-8.2	1655	-8	1866	1798.33
ZINC000004731617	-8.1	1183	-7.4	2398	-8	1818	1799.67
ZINC000000056758	-7.6	1876	-8.1	1764	-8.1	1760	1800
ZINC000000029649	-7.5	1984	-8.3	1533	-8	1884	1800.33
ZINC000001130217	-7.8	1616	-8.2	1623	-7.7	2163	1800.67
ZINC000000946923	-7.7	1789	-7.9	1977	-8.2	1636	1800.67
ZINC000000189099	-7.6	1877	-8.1	1765	-8.1	1761	1801
ZINC000082138162	-7.4	2129	-8	1916	-8.4	1358	1801
ZINC000002864695	-7.9	1495	-8	1848	-7.8	2062	1801.67
ZINC000002103800	-7.7	1778	-8	1875	-8.1	1753	1802
ZINC000000467045	-7.6	1879	-8.1	1767	-8.1	1762	1802.67
ZINC000006917932	-7.4	2110	-8.4	1412	-8	1893	1805
ZINC000000258186	-7.6	1891	-8	1883	-8.2	1644	1806
ZINC000000289960	-7.9	1506	-7.9	1957	-7.9	1957	1806.67
ZINC000019840628	-7.4	2112	-8.4	1414	-8	1894	1806.67
ZINC000072326103	-7.6	1888	-8.1	1776	-8.1	1763	1809
ZINC000000303913	-7.4	2119	-8.1	1789	-8.3	1522	1810
ZINC000000265222	-7.3	2234	-8.2	1670	-8.3	1528	1810.67
ZINC000000056773	-7.5	2004	-8.1	1777	-8.2	1652	1811
ZINC000004487681	-7.8	1604	-8.3	1506	-7.5	2326	1812
ZINC000000445415	-7.5	2005	-8.1	1778	-8.2	1653	1812
ZINC000000057595	-8.1	1172	-7.9	1945	-7.5	2320	1812.33
ZINC000000288337	-8	1329	-7.8	2053	-7.8	2056	1812.67
ZINC000004122343	-7.8	1629	-8.1	1743	-7.8	2067	1813
ZINC000017911462	-8	1330	-7.8	2054	-7.8	2057	1813.67
ZINC000002063830	-7.5	2007	-8.1	1780	-8.2	1654	1813.67
ZINC000004084526	-7.3	2238	-8.2	1674	-8.3	1529	1813.67
ZINC000000188576	-8	1333	-7.7	2163	-7.9	1947	1814.33
ZINC000004740664	-7.3	2229	-8.3	1551	-8.2	1665	1815
ZINC000000834127	-8	1334	-7.7	2164	-7.9	1948	1815.33
ZINC000009846970	-7.8	1635	-8.1	1749	-7.8	2068	1817.33
ZINC000000121782	-7.8	1643	-8	1857	-7.9	1965	1821.67
ZINC000000128785	-7.8	1644	-8	1858	-7.9	1966	1822.67
ZINC000003061941	-7.7	1755	-8.2	1638	-7.8	2076	1823
ZINC000000620044	-7.8	1664	-7.8	2064	-8.1	1743	1823.67
ZINC000004487668	-7.7	1756	-8.2	1639	-7.8	2077	1824
ZINC000006751943	-7.7	1757	-8.2	1640	-7.8	2078	1825
ZINC000011916204	-7.8	1659	-7.9	1968	-8	1848	1825
ZINC000000294013	-7.4	2144	-7.8	2110	-8.5	1222	1825.33
ZINC000002159892	-7.8	1648	-8	1862	-7.9	1967	1825.67
ZINC000070666242	-7.7	1761	-8.2	1644	-7.8	2079	1828
ZINC000000075756	-7.5	2041	-7.8	2089	-8.4	1355	1828.33
ZINC000000044432	-7.6	1866	-8.2	1647	-7.9	1985	1832.67
ZINC000002901768	-7.7	1766	-8.1	1758	-7.9	1976	1833.33
ZINC000000682205	-7.7	1794	-7.8	2069	-8.2	1637	1833.33
ZINC000000213716	-7.5	1974	-8.5	1267	-7.6	2260	1833.67
ZINC000000176701	-7.3	2219	-8.5	1273	-7.9	2011	1834.33
ZINC000003832542	-7.9	1497	-8	1850	-7.7	2157	1834.67
ZINC000019781727	-7.1	2431	-7.8	2145	-8.7	929	1835
ZINC000002075614	-7.6	1870	-8.2	1651	-7.9	1986	1835.67
ZINC000001230435	-7.7	1777	-8	1874	-8	1856	1835.67
ZINC000008666593	-7.9	1500	-8	1853	-7.7	2158	1837
ZINC000000942058	-8	1324	-7.9	1950	-7.6	2238	1837.33
ZINC000000123522	-8.1	1181	-7.4	2396	-7.9	1942	1839.67
ZINC000002899145	-7.6	1882	-8.1	1770	-8	1867	1839.67
ZINC000000239904	-7.9	1505	-7.9	1956	-7.8	2063	1841.33
ZINC000000128823	-7.3	2222	-8.4	1415	-8	1899	1845.33
ZINC000006760505	-7.3	2225	-8.4	1418	-8	1900	1847.67
ZINC000001687151	-7.5	1999	-8.2	1659	-8	1885	1847.67
ZINC000012898013	-7.6	1914	-7.9	1986	-8.2	1645	1848.33
ZINC000002927574	-7.5	2000	-8.2	1660	-8	1886	1848.67
ZINC000001097941	-7.6	1895	-8	1887	-8.1	1764	1848.67
ZINC000000056772	-7.4	2115	-8.2	1664	-8.1	1778	1852.33
ZINC000001453822	-7.4	2116	-8.2	1665	-8.1	1779	1853.33
ZINC000000029927	-7.3	2232	-8.2	1668	-8.2	1666	1855.33
ZINC000000150904	-7.3	2233	-8.2	1669	-8.2	1667	1856.33
ZINC000040312934	-7.3	2231	-8.3	1553	-8.1	1786	1856.67
ZINC000002139078	-7.3	2244	-8.1	1797	-8.3	1530	1857
ZINC000000200703	-7.8	1646	-8	1860	-7.8	2069	1858.33
ZINC000000362418	-7.3	2236	-8.2	1672	-8.2	1668	1858.67
ZINC000136774179	-7.4	2124	-8.1	1794	-8.2	1658	1858.67
ZINC000000037219	-8.2	1015	-7.6	2244	-7.5	2319	1859.33
ZINC000004342695	-7.8	1650	-8	1864	-7.8	2070	1861.33
ZINC000000193374	-7.8	1656	-7.9	1965	-7.9	1968	1863
ZINC000000284202	-7.8	1657	-7.9	1966	-7.9	1969	1864
ZINC000000060228	-7.9	1521	-7.6	2247	-8	1837	1868.33
ZINC000016850779	-7.9	1524	-7.6	2250	-8	1838	1870.67
ZINC000040308996	-6.7	2650	-8.4	1421	-8.3	1543	1871.33
ZINC000000445165	-7.7	1787	-7.9	1975	-8	1857	1873
ZINC000002191012	-7.7	1796	-7.8	2071	-8.1	1754	1873.67
ZINC000000362092	-7.2	2330	-8.5	1276	-7.9	2018	1874.67
ZINC000000409120	-7.7	1775	-8	1872	-7.9	1977	1874.67
ZINC000001103465	-7.7	1808	-7.7	2179	-8.2	1638	1875
ZINC000000480433	-7.7	1752	-8.2	1635	-7.6	2244	1877
ZINC000019595048	-7.2	2346	-8	1925	-8.4	1365	1878.67
ZINC000004340571	-7.7	1781	-8	1878	-7.9	1978	1879
ZINC000000037563	-7.6	1889	-8	1881	-8	1868	1879.33
ZINC000002097892	-7.3	2258	-7.9	2018	-8.4	1363	1879.67
ZINC000019902228	-7.9	1517	-7.8	2060	-7.8	2064	1880.33
ZINC000019797601	-7.7	1783	-8	1880	-7.9	1979	1880.67
ZINC000000262537	-7.6	1892	-8	1884	-8	1869	1881.67
ZINC000000634165	-8.2	1018	-7.4	2393	-7.6	2236	1882.33
ZINC000002847015	-7.6	1896	-8	1888	-8	1870	1884.67
ZINC000018142900	-8	1335	-7.7	2165	-7.7	2155	1885
ZINC000000077860	-7.9	1527	-7.4	2400	-8.1	1731	1886
ZINC000049537251	-7.7	1746	-8.3	1526	-7.4	2389	1887
ZINC000000294209	-7.4	2132	-7.9	2006	-8.3	1523	1887
ZINC000000036021	-7.8	1642	-8	1856	-7.7	2164	1887.33
ZINC000004342709	-7.6	1901	-8	1893	-8	1871	1888.33
ZINC000040309961	-7.4	2114	-8.3	1547	-7.9	2006	1889
ZINC000019606455	-7.6	1904	-8	1896	-8	1872	1890.67
ZINC000000210345	-7.3	2226	-8.3	1548	-8	1901	1891.67
ZINC000000262522	-7.2	2340	-8.1	1801	-8.3	1534	1891.67
ZINC000002571595	-7.5	2008	-8.1	1781	-8	1887	1892
ZINC000037432649	-7.6	1907	-8	1899	-8	1873	1893
ZINC000005005844	-7.5	2011	-8.1	1784	-8	1888	1894.33
ZINC000005184903	-7.3	2230	-8.3	1552	-8	1902	1894.67
ZINC000002883519	-7.5	2035	-7.9	1998	-8.2	1655	1896
ZINC000000070278	-7.8	1655	-7.9	1964	-7.8	2071	1896.67
ZINC000000121785	-7.2	2334	-8.2	1678	-8.2	1678	1896.67
ZINC000015769342	-7.5	2037	-7.9	2000	-8.2	1656	1897.67
ZINC000004740656	-7.4	2123	-8.1	1793	-8.1	1780	1898.67
ZINC000016985471	-7.7	1769	-8.1	1761	-7.7	2169	1899.67
ZINC000019553150	-7.3	2221	-8.5	1275	-7.7	2204	1900
ZINC000002851931	-7.5	2023	-8	1907	-8.1	1771	1900.33
ZINC000001750408	-7.4	2106	-8.4	1408	-7.7	2192	1902
ZINC000032801113	-7.6	1875	-8.2	1656	-7.7	2175	1902
ZINC000065248722	-7.8	1681	-7.4	2406	-8.2	1621	1902.67
ZINC000096115459	-7.3	2247	-8.1	1800	-8.2	1669	1905.33
ZINC000000162989	-7	2494	-8.2	1686	-8.3	1539	1906.33
ZINC000000284203	-7.7	1774	-8	1871	-7.8	2080	1908.33
ZINC000000062333	-7.9	1514	-7.8	2057	-7.7	2159	1910
ZINC000000175292	-8.1	1182	-7.4	2397	-7.7	2151	1910
ZINC000049543474	-7.7	1800	-7.8	2075	-8	1858	1911
ZINC000002864574	-7.6	1881	-8.1	1769	-7.8	2087	1912.33
ZINC000019235034	-7.3	2269	-7.8	2126	-8.4	1364	1919.67
ZINC000000073789	-7.8	1682	-7.3	2460	-8.2	1622	1921.33
ZINC000000782991	-7.5	2058	-7.7	2193	-8.3	1514	1921.67
ZINC000002087287	-7.1	2415	-8.3	1555	-8.1	1796	1922
ZINC000005960281	-7.6	1934	-7.7	2189	-8.2	1646	1923
ZINC000006490294	-7.6	1913	-7.9	1985	-8	1874	1924
ZINC000002864713	-7.6	1898	-8	1890	-7.9	1987	1925
ZINC000001083472	-7.5	2006	-8.1	1779	-7.9	1994	1926.33
ZINC000000850431	-7.5	1986	-8.3	1535	-7.6	2261	1927.33
ZINC000170625767	-7.6	1918	-7.9	1990	-8	1875	1927.67
ZINC000002436783	-7.4	2117	-8.2	1666	-7.9	2007	1930
ZINC000064580904	-7.4	2152	-7.8	2118	-8.3	1524	1931.33
ZINC000012428191	-7.5	1992	-8.3	1541	-7.6	2262	1931.67
ZINC000002140469	-7.5	2045	-7.8	2093	-8.2	1657	1931.67
ZINC000008765243	-8	1340	-7.4	2399	-7.8	2058	1932.33
ZINC000002096710	-7.5	2033	-7.9	1996	-8.1	1772	1933.67
ZINC000000195377	-7.3	2255	-7.9	2015	-8.3	1531	1933.67
ZINC000000397608	-7.4	2120	-8.1	1790	-8	1895	1935
ZINC000000036001	-7.5	2016	-8	1900	-8	1889	1935
ZINC000019781772	-7.4	2136	-7.9	2010	-8.2	1659	1935
ZINC000001005760	-7.8	1668	-7.7	2168	-7.9	1970	1935.33
ZINC000000037223	-7.5	2017	-8	1901	-8	1890	1936
ZINC000020573472	-7.8	1671	-7.7	2171	-7.9	1971	1937.67
ZINC000040312999	-7.5	2039	-7.9	2002	-8.1	1773	1938
ZINC000049543583	-7.8	1672	-7.7	2172	-7.9	1972	1938.67
ZINC000002188662	-7.2	2331	-8.5	1277	-7.7	2212	1940
ZINC000000305336	-7.6	1878	-8.1	1766	-7.7	2176	1940
[truncated: 1,094 more rows]
